# Supplementary material for: How accurate are static polarizability predictions from density functional theory? An assessment over 132 species at equilibrium geometry
Source: Royal Society of Chemistry journal article supplement (doi:10.1039/c8cp03569e), 2018-01-01
Supplement: c8cp03569e1.zip [file c8cp03569e1.zip]

## Sheet: Benchmarks
CBS	CCSD(T)-XX	CCSD(T)-YY	CCSD(T)-ZZ		Static Polarizibility Benchmark	Experiment		Geometry source	Field strength for Finite difference (in a.u.)
AlF	5.971	5.971	5.132		5.691			NIST	0.01
Ar	1.634	1.634	1.634		1.634	1.664		NIST	0.01
Be	5.622	5.622	5.622		5.622	5.6		NIST	0.01
BeH	5.395	5.395	3.825		4.872			NIST	0.01		All values are in cubic Angstroms
BeH2	2.913	2.913	2.974		2.933			NIST	0.01
BF	2.95	2.95	2.686		2.862			NIST	0.01
BH2	2.832	3.019	2.914		2.922			NIST	0.01
BH2Cl	3.548	4.044	5.488		4.36			Kawashima, Y., Takeo, H., Sugie, M., Matsumura, C. and Hirota, E., 1993. Microwave spectrum of chloroborane, BH2Cl. The Journal of chemical physics, 99(2), pp.820-826.	0.01
BH2F	2.083	2.648	2.62		2.45			Takeo, H., Sugie, M. and Matsumura, C., 1993. Microwave Spectroscopic Detection of Fluoroborane, BH2F. Journal of Molecular Spectroscopy, 158(1), pp.201-207.	0.01
BH3	2.73	2.73	2.099		2.52			NIST	0.01
BHF2	2.048	2.603	2.504		2.385			NIST	0.01
BN	2.547	2.547	4.15		3.081			NIST	0.01
BO	2.246	2.246	2.797		2.43			NIST	0.01
BS	4.341	4.341	6.28		4.987			NIST	0.01
C2H	3.02	3.02	3.871		3.304			NIST	0.01
C2H2	2.758	2.758	4.501		3.339	3.487		NIST	0.01
C2H3	3.435	4.998	3.132		3.855			NIST	0.01
C2H4	3.25	3.701	5.069		4.007	4.188		NIST	0.01
CH2BH	4.117	3.61	5.762		4.496			MP2/cc-pVTZ	0.01
CH2F	2.233	2.55	2.32		2.368			MP2/cc-pVTZ	0.01
CH2NH	3.211	2.523	4.03		3.255			NIST	0.01
CH2PH	7.611	4.929	5.641		6.06			MP2/cc-pVTZ	0.01
CH2-t	2.106	2.301	2.023		2.143			NIST	0.01
CH3	2.341	2.341	2.341		2.341			NIST	0.01
CH3BH2	3.698	4.867	4.251		4.272			MP2/cc-pVTZ	0.01
CH3Cl	3.93	3.93	5.39		4.417	4.416		NIST	0.01
CH3F	2.371	2.371	2.562		2.435	2.54		NIST	0.01
CH3NH2	4.108	3.609	3.511		3.743			MP2/cc-pVTZ	0.01
CH3O	4.181	2.77	3.399		3.45			NIST	0.01
CH3OH	2.998	3.398	2.917		3.104	3.21		NIST	0.01
CH3SH	6.285	4.984	4.981		5.417			NIST	0.01
CH4	2.426	2.426	2.426		2.426	2.448		NIST	0.01
Cl2	3.666	3.666	6.174		4.502	4.61		NIST	0.01
ClCN	3.385	3.385	6.644		4.471			NIST	0.01
ClF	2.356	2.356	3.337		2.683			NIST	0.01
CN	2.405	2.405	3.782		2.864			NIST	0.01
CO	1.753	1.753	2.283		1.93	1.953		NIST	0.01
CO2	1.891	1.891	3.954		2.579	2.507		NIST	0.01
CS	3.507	3.507	5.608		4.207			NIST	0.01
CSO	3.781	3.781	7.778		5.113	5.09		NIST	0.01
F2	0.946	0.946	1.839		1.244	1.16		NIST	0.01
FCN	2.162	2.162	3.723		2.682	2.55		NIST	0.01
FCO	3.32	2.404	2.027		2.584			NIST	0.01
FH-OH	1.886	1.602	2.28		1.923			TA13	0.01
FNO	3.445	2.465	1.747		2.552			NIST	0.01
H	0.667	0.667	0.667		0.667	0.667		NIST	0.01
H2	0.678	0.678	0.948		0.768	0.783		NIST	0.01
H2CN	2.262	2.773	3.657		2.897			MP2/cc-pVTZ	0.01
H2O	1.362	1.46	1.406		1.409	1.501		NIST	0.01
H2O-Li	38.527	33.527	43.727		38.594			TA13	0.001
HBO	2.1	2.1	3.171		2.457			NIST	0.01
HBS	4.211	4.211	6.678		5.033			NIST	0.01
HCCCl	3.98	3.98	8.157		5.372			NIST	0.01
HCCF	2.748	2.748	4.774		3.423			NIST	0.01
HCHO	1.912	2.633	3.288		2.611	2.77		NIST	0.01
HCHS	3.891	4.571	6.673		5.045			NIST	0.01
HCl	2.458	2.458	2.709		2.542	2.515		NIST	0.01
HCN	2.061	2.061	3.295		2.472	2.593		NIST	0.01
HCO	2.633	2.892	1.93		2.485			NIST	0.01
HCONH2	5.189	4.087	2.967		4.081	4.08		NIST	0.01
HCOOH	4.005	3.52	2.401		3.309	3.319		NIST	0.01
HCP	4.438	4.438	6.898		5.258			NIST	0.01
He	0.205	0.205	0.205		0.205	0.208		NIST	0.01
HF	0.762	0.762	0.932		0.819	0.8		NIST	0.01
HNC	2.312	2.312	3.475		2.7			NIST	0.01
HNO	1.589	2.293	2.77		2.217			NIST	0.01
HNS	5.625	3.921	3.436		4.327			NIST	0.01
HO2	1.738	2.702	1.477		1.972			NIST	0.01
HOCl	2.934	2.793	4.21		3.312			NIST	0.01
HOF	1.516	1.345	2.351		1.737			NIST	0.01
HOOH	2.006	2.786	1.855		2.216			NIST	0.01
Li	24.304	24.304	24.304		24.304	24.33		NIST	0.01
Li2	24.439	24.439	43.918		30.932			NIST	0.001
LiBH4	4.298	4.298	4.665		4.42			MP2/cc-pVTZ	0.01
LiCl	3.775	3.775	3.976		3.842			NIST	0.01
LiCN	3.721	3.873	3.15		3.581			MP2/cc-pVTZ	0.01
LiH	4.374	4.374	3.81		4.186			NIST	0.001
Mg	10.591	10.591	10.591		10.591	10.6		NIST	0.001
Mg2	18.401	18.401	32.401		23.068			NIST	0.001
N	1.077	1.077	1.077		1.077	1.1		NIST	0.01
N2	1.506	1.506	2.184		1.732	1.71		NIST	0.01
N2H2	3.498	2.068	2.872		2.813			NIST	0.01
N2H4	3.121	3.721	3.157		3.333	3.46		NIST	0.01
Na	24.32	24.32	24.32		24.32	24.11		NIST	0.01
Na2	30.434	30.434	55.115		38.661			NIST	0.001
NaCl	4.181	4.181	4.843		4.402			NIST	0.001
NaCN	4.458	4.095	3.467		4.007			MP2/cc-pVTZ	0.01
NaH	5.81	5.81	8.169		6.596			NIST	0.001
NaLi	27.512	27.512	50.347		35.124			NIST	0.001
NCO	2.284	2.284	4.826		3.131			MP2/cc-pVTZ	0.01
Ne	0.393	0.393	0.393		0.393	0.381		NIST	0.01
NH	1.329	1.329	1.697		1.452			NIST	0.01
NH2	1.574	1.861	1.918		1.784			NIST	0.01
NH2Cl	3.433	3.428	5.002		3.954			MP2/cc-pVTZ	0.01
NH2F	2.092	2.415	2.061		2.189			MP2/cc-pVTZ	0.01
NH2OH	2.652	3.235	2.479		2.789			NIST	0.01
NH3	2	2	2.242		2.081	2.103		NIST	0.01
NH3O	2.664	2.664	3.702		3.01			MP2/cc-pVTZ	0.01
NO	1.488	1.488	2.193		1.723	1.698		NIST	0.01
NOCl	4.695	7.051	3.389		5.045			NIST	0.01
NP	3.517	3.517	5.422		4.152			NIST	0.01
O2	1.21	1.21	2.263		1.561	1.562		NIST	0.01
O3	1.745	4.586	2.126		2.819	3.079		NIST	0.01
OCl	2.421	2.421	4.171		3.004			NIST	0.01
OCl2	4.21	7.733	4.625		5.523			NIST	0.01
OF	1.094	1.094	2.033		1.407			NIST	0.01
OF2	1.453	2.953	1.981		2.129			NIST	0.01
OH	1.11	1.11	1.258		1.159			NIST	0.01
P	3.705	3.705	3.705		3.705	3.63		NIST	0.01
P2	5.923	5.923	10.155		7.334			NIST	0.01
P2H4	7.388	10.698	7.412		8.499			MP2/cc-pVTZ	0.01
PH	3.906	3.906	4.364		4.059			NIST	0.01
PH2	4.081	4.411	4.496		4.329			NIST	0.01
PH2OH	4.872	4.949	4.854		4.892			MP2/cc-pVTZ	0.01
PH3	4.405	4.405	4.616		4.475	4.237		NIST	0.01
PH3O	4.092	4.092	4.918		4.367			MP2/cc-pVTZ	0.01
PS	5.112	5.112	9.373		6.532			NIST	0.01
S2	4.657	4.657	8.686		6			NIST	0.01
S2H2	5.655	8.287	5.626		6.523			NIST	0.01
SCl	4.389	4.389	7.196		5.325			NIST	0.01
SCl2	5.582	10.069	7.038		7.563			NIST	0.01
SF	3.19	3.19	3.604		3.328			NIST	0.01
SF2	3.173	3.815	3.445		3.478			NIST	0.01
SH	3.438	3.438	3.449		3.442			NIST	0.01
SH2	3.634	3.57	3.558		3.587	3.631		NIST	0.01
SiH3	5.013	5.012	4.982		5.002			NIST	0.01
SiH3Cl	5.658	5.658	7.164		6.16			NIST	0.01
SiH3F	4.231	4.231	3.879		4.114			NIST	0.01
SiH4	4.589	4.589	4.589		4.589	4.777		NIST	0.01
SiO	4.02	4.02	5.075		4.372			NIST	0.01
SO2	2.892	5.017	3.382		3.764	3.882		NIST	0.01
SO-trip	2.942	2.942	4.351		3.412			NIST	0.01

## Sheet: Rankings
Method	Class	RMSRE	RMSRE (NSP)	RMSRE (SP)	MRE	MAX	COMPVAR				Atoms and Molecules	RMSRE (Cumulative)	RMSRE (Atoms)	RMSRE (Linear Molecules)	RMSRE (Non-linear Molecules)	RMSRE (Molecules)
CCSD	WFT	1.62	1.55	1.71	-1.2	6.26	0.34				CCSD	1.62	0.85	1.64	1.69	1.67
XYGJOS	dhGGA	2.44	1.33	3.37	0.7	15.46	0.45				XYGJOS	2.44	3.66	3.18	1.19	2.31
XYG3	dhGGA	2.68	1.53	3.68	0.2	14.98	0.44				XYG3	2.68	4.18	3.4	1.43	2.52
DSD-PBEPBE-D3	dhGGA	2.73	1.76	3.63	1.12	14.3	0.25				DSD-PBEPBE-D3	2.73	4.73	3.33	1.48	2.5
MPW1K	hGGA	3.27	2.94	3.67	-0.38	17.36	0.85				MPW1K	3.27	6.5	3.36	2.32	2.84
B2GPPLYP	dhGGA	3.4	2.16	4.55	1.31	20.23	0.24				B2GPPLYP	3.4	5.81	4.21	1.8	3.12
PTPSS-D3	dhmGGA	3.59	2.89	4.23	2.05	25.63	0.28				PTPSS-D3	3.59	5.68	4.38	2.17	3.36
wB97X-2	dhGGA	3.6	2.89	4.37	1.79	16.89	0.46				wB97X-2	3.6	6.18	4.33	2.11	3.3
PBE50	hGGA	3.71	3.45	4.03	-1.1	18.25	1				PBE50	3.71	6.61	3.75	2.97	3.35
PWPB95-D3	dhmGGA	3.72	2.54	4.85	1.81	24.37	0.39				PWPB95-D3	3.72	6.99	4.18	2.38	3.32
MPW1PW91	hGGA	3.86	3.52	4.27	2.39	14.99	0.21				MPW1PW91	3.86	8.05	3.88	2.71	3.29
BHHLYP	hGGA	3.95	2.92	4.99	-0.17	22.08	0.18				BHHLYP	3.95	7.02	4.57	2.49	3.58
SCAN0	hmGGA	3.98	2.6	5.23	0.39	18.73	0.76				SCAN0	3.98	7.64	4.7	2.04	3.5
LRC-wPBEh	hGGA	4.28	3.93	4.68	2.51	18.28	0.63				LRC-wPBEh	4.28	9.44	4.21	2.83	3.53
PBE0	hGGA	4.29	3.98	4.67	2.84	16.19	0.28				PBE0	4.29	8.6	4.29	3.17	3.72
HSEHJS	hGGA	4.31	4	4.69	2.86	16.99	0.26				HSEHJS	4.31	8.53	4.32	3.23	3.76
wM05-D	hmGGA	4.33	3.73	5	2.31	19.89	0.09				wM05-D	4.33	9.32	4.57	2.6	3.63
B2PLYP	dhGGA	4.36	3.1	5.6	2.49	27.45	0.36				B2PLYP	4.36	6.9	5.14	2.95	4.09
mBEEF	mGGA	4.36	3.75	5.05	2.02	18.04	0.5				mBEEF	4.36	7.79	4.44	3.49	3.95
PW6B95	hmGGA	4.53	3.75	5.48	2.42	19.31	0.11				PW6B95	4.55	8.58	4.64	3.49	4.05
wB97X-V	hGGA	4.58	4.02	5.23	2.38	20.12	0.39				wB97X-V	4.58	9.2	5.2	2.54	3.97
MGGA_MVS	mGGA	4.59	3.64	5.54	0.57	22.19	0.46				MGGA_MVS	4.59	8.94	5.23	2.56	4.03
SOGGA11-X	hGGA	4.65	3.39	5.88	1.5	27.71	0.42				SOGGA11-X	4.65	10.47	5.11	2.19	3.79
rcamB3LYP	hGGA	4.67	4.1	5.31	1.37	24.07	0.73				rcamB3LYP	4.67	9.98	5.3	2.2	3.92
B97-2	hGGA	4.96	3.88	6.08	3.05	25.13	0.08				B97-2	4.96	11.02	5.07	3.03	4.08
camB3LYP	hGGA	4.97	4.18	5.85	2.67	20.21	0.11				camB3LYP	4.97	10.07	5.4	3.1	4.29
MGGA_MS2h	hmGGA	4.98	3.91	6.06	2.72	29.23	0.59				MGGA_MS2h	4.98	8.88	5.71	3.14	4.51
MN15	hmGGA	5	3.5	6.47	2.13	20.54	0.34				MN15	5	11.01	4.45	3.86	4.14
LRC-wPBE	hGGA	5.07	4.84	5.35	3.05	21.63	0.69				LRC-wPBE	5.07	11.15	4.9	3.5	4.2
MGGA_MVSh	hmGGA	5.08	4.17	5.96	-1.83	21.91	0.12				MGGA_MVSh	5.08	7.95	6.06	3.29	4.77
wB97X-D	hGGA	5.18	4.13	6.29	3.37	21.44	0.5				wB97X-D	5.18	12.03	5.23	2.94	4.14
M06-2X	hmGGA	5.22	3.38	6.93	0.34	35.47	0.35				M06-2X	5.22	14.14	4.61	2.46	3.62
M06	hmGGA	5.24	4.71	5.85	2.99	29.79	0.76				M06	5.24	12.77	4.8	3.23	4.04
SCAN	mGGA	5.31	4.79	5.91	3.25	17.93	0.37				SCAN	5.31	9.75	5.3	4.25	4.76
TPSSh	hmGGA	5.44	5.06	5.88	3.97	23.04	0.24				TPSSh	5.44	9.79	5.54	4.32	4.91
M06-L	mGGA	6.06	3.98	7.99	2.1	45.06	1.88				M06-L	6.06	15.37	5.63	3.14	4.44
M11	hmGGA	6.13	4.64	7.58	1.71	66.69	3.99				M11	6.13	8.21	7.51	4.06	5.88
B3LYP	hGGA	6.24	5.37	7.2	4.18	29.5	0.39				B3LYP	6.24	10.38	6.79	4.78	5.78
MGGA_MS2	mGGA	6.26	5.27	7.3	4.11	35.89	0.75				MGGA_MS2	6.26	9.9	7.01	4.62	5.86
revM06-L	mGGA	6.31	5.32	7.33	0.88	41.83	1.12				revM06-L	6.31	16.57	6.07	2.6	4.51
B97	hGGA	6.4	4.91	7.88	4.19	49.07	1.28				B97	6.4	10.04	7.65	4.12	6
M05	hmGGA	6.46	6.12	6.89	3.35	33.3	1.95				M05	6.46	13.15	6.56	4.51	5.54
wB97M-V	hmGGA	6.83	5.55	8.19	3.91	26.32	0.96				wB97M-V	6.83	14.12	6.91	4.75	5.83
TPSS	mGGA	7.39	6.99	7.89	5.76	34.52	0.55				TPSS	7.39	11.17	7.33	6.69	6.99
RHF	WFT	7.6	6.84	8.48	-2.81	30.37	1.56				RHF	7.6	10.4	7.76	6.9	7.31
B97M-V	mGGA	7.65	6.73	8.68	5.13	31.55	0.06				B97M-V	7.65	12.93	7.77	6.38	7.04
MN15-L	mGGA	7.95	7.18	8.84	6.12	43.16	0.12				MN15-L	7.95	11.27	7.85	7.31	7.61
RMP2	WFT	8.14	2.17	11.94	0.71	197.48	15.07				RMP2	8.14	3.78	11.46	2.47	8.33
t-HCTH	mGGA	8.27	7.39	9.31	6.05	40.83	1.03				t-HCTH	8.27	16.19	7.74	6.79	7.24
HF	WFT	8.45	6.84	10.15	-3.04	58.99	3.21				HF	8.45	9.8	9.61	6.98	8.31
HFLYP	hGGA	8.61	8.61	8.6	-6.21	34.3	1.36				HFLYP	8.61	7.74	8.86	8.5	8.67
N12	GGA	8.92	7.93	9.98	5.72	48.35	1.6				N12	8.92	15.31	8.71	7.63	8.16
MPW91	GGA	9.2	8.7	9.81	7.22	62.06	1.37				MPW91	9.2	12.31	8.66	9.03	8.89
B97-D	GGA	9.48	8.57	10.56	7.4	53.07	0.46				B97-D	9.48	14.33	9.76	8.17	8.97
BMK	hmGGA	9.49	3	13.75	1.53	90.11	6.72				BMK	9.49	6.12	14.23	1.92	9.69
PBE	GGA	10.11	9.64	10.69	7.91	68.07	1.73				PBE	10.11	13.17	9.58	9.97	9.81
MN12-SX	hmGGA	10.39	5.35	14.56	3.12	90.29	4.92				MN12-SX	10.39	25.44	9.18	6.24	7.71
M06-HF	hmGGA	10.69	9.65	11.84	0.04	58.68	1.76				M06-HF	10.69	22.41	8.77	9.12	9.05
MP2	WFT	11.12	2.17	16.68	-0.28	134.01	16.14				MP2	11.12	8.74	10.88	10.69	11.16
SPW92	LSDA	11.93	10.61	13.31	8.57	119.87	4.22				SPW92	11.93	16.57	10.03	12.29	11.44
BLYP	GGA	12.14	10.73	13.78	8.94	75.44	1.06				BLYP	12.14	14.47	12.7	11.17	11.93
MN12-L	mGGA	15.14	7.05	21.52	3.98	200.38	11.27				MN12-L	15.14	26.9	16.24	9.51	13.43
M11-L	mGGA	15.41	11.86	19.01	7.65	126.79	3.12				M11-L	15.41	21.21	19.35	9.41	14.82
Slater	LSDA	19.15	19.39	18.83	16.74	102.68	1.99				Slater	19.15	22.82	18.42	19.1	18.82
SOGGA11	GGA	77.54	24.91	113.8	14.79	1036.85	45.91				SOGGA11	77.54	24.83	118.34	14.08	80.31

## Sheet: Data & Error Analysis
Name	Spin Polarization	CCSD(T)-XX	CCSD(T)-YY	CCSD(T)-ZZ	HF				MP2				CCSD				RHF				RMP2				Slater				SPW92				N12				PBE				BLYP				B97-D				SOGGA11
AlF	NSP	5.971	5.971	5.132	AlF	6.511	6.511	5.101	AlF	6.05	6.05	5.237	AlF	5.993	5.993	5.056	AlF	6.511	6.511	5.101	AlF	6.05	6.05	5.237	AlF	6.648	6.648	6.092	AlF	6.154	6.154	5.59	AlF	6.374	6.374	5.595	AlF	6.292	6.292	5.656	AlF	6.224	6.224	5.669	AlF	6.363	6.363	5.626	AlF
Ar	NSP	1.634	1.634	1.634	Ar	1.589	1.589	1.589	Ar	1.638	1.638	1.638	Ar	1.619	1.619	1.619	Ar	1.589	1.589	1.589	Ar	1.638	1.638	1.638	Ar	1.889	1.889	1.889	Ar	1.779	1.779	1.779	Ar	1.69	1.69	1.69	Ar	1.769	1.769	1.769	Ar	1.797	1.797	1.797	Ar	1.74	1.74	1.74	Ar
BeH2	NSP	2.913	2.913	2.974	BeH2	2.791	2.791	2.883	BeH2	2.851	2.851	2.931	BeH2	2.903	2.903	2.965	BeH2	2.791	2.791	2.883	BeH2	2.851	2.851	2.931	BeH2	3.514	3.514	3.539	BeH2	3.276	3.276	3.295	BeH2	3.131	3.131	3.189	BeH2	3.197	3.197	3.218	BeH2	3.141	3.141	3.22	BeH2	3.169	3.169	3.195	BeH2
BF	NSP	2.95	2.95	2.686	BF	3.07	3.07	2.478	BF	3.072	3.072	2.713	BF	2.939	2.939	2.624	BF	3.07	3.07	2.478	BF	3.072	3.072	2.713	BF	3.603	3.603	3.27	BF	3.315	3.315	2.991	BF	3.244	3.244	2.9	BF	3.271	3.271	2.974	BF	3.29	3.29	2.996	BF	3.276	3.276	2.922	BF
BH2Cl	NSP	3.548	4.044	5.488	BH2Cl	3.468	3.951	5.119	BH2Cl	3.562	4.056	5.48	BH2Cl	3.517	4.008	5.385	BH2Cl	3.468	3.951	5.119	BH2Cl	3.562	4.056	5.48	BH2Cl	4.014	4.624	6.266	BH2Cl	3.784	4.351	5.967	BH2Cl	3.641	4.187	5.72	BH2Cl	3.743	4.302	5.893	BH2Cl	3.773	4.34	5.916	BH2Cl	3.721	4.274	5.81	BH2Cl
BH2F	NSP	2.083	2.648	2.62	BH2F	1.977	2.536	2.381	BH2F	2.085	2.651	2.626	BH2F	2.061	2.62	2.567	BH2F	1.977	2.536	2.381	BH2F	2.085	2.651	2.626	BH2F	2.425	3.127	3.049	BH2F	2.285	2.922	2.889	BH2F	2.191	2.809	2.756	BH2F	2.254	2.885	2.86	BH2F	2.247	2.89	2.86	BH2F	2.224	2.857	2.804	BH2F
BH3	NSP	2.73	2.73	2.099	BH3	2.676	2.676	2.046	BH3	2.722	2.722	2.088	BH3	2.717	2.717	2.089	BH3	2.676	2.676	2.046	BH3	2.722	2.722	2.088	BH3	3.21	3.21	2.43	BH3	3.005	3.005	2.294	BH3	2.904	2.904	2.208	BH3	2.942	2.942	2.242	BH3	2.941	2.941	2.228	BH3	2.921	2.921	2.219	BH3
BHF2	NSP	2.048	2.603	2.504	BHF2	1.886	2.287	2.273	BHF2	2.063	2.614	2.528	BHF2	2.012	2.537	2.452	BHF2	1.886	2.287	2.273	BHF2	2.063	2.614	2.528	BHF2	2.401	3.048	2.962	BHF2	2.258	2.896	2.782	BHF2	2.151	2.734	2.646	BHF2	2.244	2.879	2.772	BHF2	2.243	2.88	2.783	BHF2	2.206	2.798	2.719	BHF2
C2H2	NSP	2.758	2.758	4.501	C2H2	2.879	2.879	4.669	C2H2	2.778	2.778	4.488	C2H2	2.732	2.732	4.467	C2H2	2.879	2.879	4.669	C2H2	2.778	2.778	4.488	C2H2	3.247	3.247	4.957	C2H2	2.976	2.976	4.743	C2H2	2.947	2.947	4.747	C2H2	2.981	2.981	4.741	C2H2	3.036	3.036	4.8	C2H2	2.996	2.996	4.754	C2H2
C2H4	NSP	3.25	3.701	5.069	C2H4	3.422	3.678	5.481	C2H4	3.331	3.743	5.101	C2H4	3.232	3.668	5.084	C2H4	3.422	3.678	5.481	C2H4	3.331	3.743	5.101	C2H4	3.805	4.181	5.67	C2H4	3.481	3.949	5.412	C2H4	3.435	3.873	5.389	C2H4	3.472	3.914	5.389	C2H4	3.534	3.95	5.444	C2H4	3.494	3.905	5.405	C2H4
CH2BH	NSP	4.117	3.61	5.762	CH2BH	4.362	3.587	5.926	CH2BH	4.209	3.654	5.745	CH2BH	4.096	3.578	5.748	CH2BH	4.362	3.587	5.926	CH2BH	4.209	3.654	5.745	CH2BH	5.024	4.126	6.409	CH2BH	4.46	3.858	6.074	CH2BH	4.482	3.801	6.06	CH2BH	4.478	3.822	6.05	CH2BH	4.575	3.853	6.119	CH2BH	4.558	3.823	6.074	CH2BH
CH3BH2	NSP	3.698	4.867	4.251	CH3BH2	3.603	4.583	4.16	CH3BH2	3.706	4.873	4.26	CH3BH2	3.668	4.791	4.219	CH3BH2	3.603	4.583	4.16	CH3BH2	3.706	4.873	4.26	CH3BH2	4.207	5.808	4.88	CH3BH2	3.98	5.468	4.6	CH3BH2	3.854	5.25	4.463	CH3BH2	3.912	5.357	4.526	CH3BH2	3.917	5.336	4.54	CH3BH2	3.887	5.28	4.503	CH3BH2
CH3Cl	NSP	3.93	3.93	5.39	CH3Cl	3.833	3.833	5.318	CH3Cl	3.962	3.962	5.432	CH3Cl	3.886	3.886	5.348	CH3Cl	3.833	3.833	5.318	CH3Cl	3.962	3.962	5.432	CH3Cl	4.496	4.496	6.012	CH3Cl	4.226	4.226	5.728	CH3Cl	4.062	4.062	5.582	CH3Cl	4.184	4.184	5.688	CH3Cl	4.232	4.232	5.742	CH3Cl	4.154	4.154	5.652	CH3Cl
CH3F	NSP	2.371	2.371	2.562	CH3F	2.271	2.271	2.403	CH3F	2.389	2.389	2.581	CH3F	2.343	2.343	2.522	CH3F	2.271	2.271	2.403	CH3F	2.389	2.389	2.581	CH3F	2.757	2.757	2.933	CH3F	2.594	2.594	2.78	CH3F	2.494	2.494	2.687	CH3F	2.569	2.569	2.77	CH3F	2.58	2.58	2.782	CH3F	2.54	2.54	2.73	CH3F
CH3NH2	NSP	4.108	3.609	3.511	CH3NH2	3.91	3.381	3.396	CH3NH2	4.164	3.649	3.535	CH3NH2	4.044	3.547	3.473	CH3NH2	3.91	3.381	3.396	CH3NH2	4.164	3.649	3.535	CH3NH2	4.835	4.343	3.985	CH3NH2	4.514	3.981	3.763	CH3NH2	4.415	3.848	3.666	CH3NH2	4.479	3.939	3.724	CH3NH2	4.51	3.981	3.754	CH3NH2	4.438	3.903	3.702	CH3NH2
CH3OH	NSP	2.998	3.398	2.917	CH3OH	2.874	3.206	2.745	CH3OH	3.019	3.438	2.948	CH3OH	2.96	3.343	2.871	CH3OH	2.874	3.206	2.745	CH3OH	3.019	3.438	2.948	CH3OH	3.426	3.948	3.444	CH3OH	3.236	3.708	3.203	CH3OH	3.138	3.611	3.081	CH3OH	3.206	3.691	3.172	CH3OH	3.228	3.716	3.194	CH3OH	3.18	3.649	3.137	CH3OH
CH3SH	NSP	6.285	4.984	4.981	CH3SH	6.196	4.892	4.875	CH3SH	6.361	5.027	5.035	CH3SH	6.23	4.936	4.923	CH3SH	6.196	4.892	4.875	CH3SH	6.361	5.027	5.035	CH3SH	7.109	5.683	5.865	CH3SH	6.726	5.335	5.403	CH3SH	6.552	5.146	5.184	CH3SH	6.667	5.275	5.344	CH3SH	6.726	5.335	5.422	CH3SH	6.631	5.251	5.321	CH3SH
CH4	NSP	2.426	2.426	2.426	CH4	2.372	2.372	2.372	CH4	2.445	2.445	2.445	CH4	2.406	2.406	2.406	CH4	2.372	2.372	2.372	CH4	2.445	2.445	2.445	CH4	2.797	2.797	2.797	CH4	2.636	2.636	2.636	CH4	2.547	2.547	2.547	CH4	2.59	2.59	2.59	CH4	2.601	2.601	2.601	CH4	2.57	2.57	2.57	CH4
Cl2	NSP	3.666	3.666	6.174	Cl2	3.546	3.546	6.244	Cl2	3.705	3.705	6.187	Cl2	3.617	3.617	6.159	Cl2	3.546	3.546	6.244	Cl2	3.705	3.705	6.187	Cl2	4.194	4.194	6.654	Cl2	3.931	3.931	6.378	Cl2	3.73	3.73	6.186	Cl2	3.908	3.908	6.363	Cl2	3.967	3.967	6.446	Cl2	3.867	3.867	6.322	Cl2
ClCN	NSP	3.385	3.385	6.644	ClCN	3.332	3.332	6.477	ClCN	3.39	3.39	6.582	ClCN	3.346	3.346	6.533	ClCN	3.332	3.332	6.477	ClCN	3.39	3.39	6.582	ClCN	3.764	3.764	7.419	ClCN	3.554	3.554	7.138	ClCN	3.431	3.431	6.98	ClCN	3.544	3.544	7.135	ClCN	3.59	3.59	7.187	ClCN	3.521	3.521	7.09	ClCN
ClF	NSP	2.356	2.356	3.337	ClF	2.242	2.242	3.307	ClF	2.372	2.372	3.317	ClF	2.32	2.32	3.318	ClF	2.242	2.242	3.307	ClF	2.372	2.372	3.317	ClF	2.773	2.773	3.567	ClF	2.579	2.579	3.42	ClF	2.432	2.432	3.342	ClF	2.573	2.573	3.431	ClF	2.606	2.606	3.47	ClF	2.533	2.533	3.396	ClF
CO	NSP	1.753	1.753	2.283	CO	1.671	1.671	2.145	CO	1.765	1.765	2.302	CO	1.73	1.73	2.264	CO	1.671	1.671	2.145	CO	1.765	1.765	2.302	CO	1.993	1.993	2.49	CO	1.872	1.872	2.358	CO	1.806	1.806	2.312	CO	1.856	1.856	2.363	CO	1.869	1.869	2.379	CO	1.839	1.839	2.346	CO
CO2	NSP	1.891	1.891	3.954	CO2	1.776	1.776	3.518	CO2	1.917	1.917	4.069	CO2	1.861	1.861	3.899	CO2	1.776	1.776	3.518	CO2	1.917	1.917	4.069	CO2	2.088	2.088	4.107	CO2	1.976	1.976	3.967	CO2	1.909	1.909	3.863	CO2	1.982	1.982	3.965	CO2	2	2	3.999	CO2	1.962	1.962	3.921	CO2
CS	NSP	3.507	3.507	5.608	CS	3.548	3.548	5.494	CS	3.483	3.483	5.557	CS	3.493	3.493	5.599	CS	3.548	3.548	5.494	CS	3.483	3.483	5.557	CS	3.906	3.906	6.152	CS	3.658	3.658	5.804	CS	3.537	3.537	5.651	CS	3.635	3.635	5.796	CS	3.688	3.688	5.846	CS	3.631	3.631	5.772	CS
CSO	NSP	3.781	3.781	7.778	CSO	3.765	3.765	7.277	CSO	3.808	3.808	7.949	CSO	3.759	3.759	7.735	CSO	3.765	3.765	7.277	CSO	3.808	3.808	7.949	CSO	4.206	4.206	7.957	CSO	3.93	3.93	7.69	CSO	3.781	3.781	7.491	CSO	3.929	3.929	7.681	CSO	3.989	3.989	7.758	CSO	3.915	3.915	7.634	CSO
FCN	NSP	2.162	2.162	3.723	FCN	2.127	2.127	3.554	FCN	2.158	2.158	3.679	FCN	2.133	2.133	3.66	FCN	2.127	2.127	3.554	FCN	2.158	2.158	3.679	FCN	2.443	2.443	4.116	FCN	2.296	2.296	3.959	FCN	2.234	2.234	3.87	FCN	2.301	2.301	3.968	FCN	2.325	2.325	3.993	FCN	2.287	2.287	3.937	FCN
FNO	NSP	3.445	2.465	1.747	FNO	3.244	2.296	1.598	FNO	3.355	2.428	1.761	FNO	3.413	2.426	1.708	FNO	3.244	2.296	1.598	FNO	3.355	2.428	1.761	FNO	3.669	2.735	1.975	FNO	3.51	2.568	1.854	FNO	3.408	2.467	1.765	FNO	3.525	2.58	1.849	FNO	3.553	2.6	1.864	FNO	3.476	2.534	1.815	FNO
H	NSP	0.667	0.667	0.667	H	0.667	0.667	0.667	H	0.667	0.667	0.667	H	0.667	0.667	0.667	H	0.667	0.667	0.667	H	0.667	0.667	0.667	H	0.958	0.958	0.958	H	0.902	0.902	0.902	H	0.825	0.825	0.825	H	0.829	0.829	0.829	H	0.831	0.831	0.831	H	0.816	0.816	0.816	H
H2	NSP	0.678	0.678	0.948	H2	0.683	0.683	0.958	H2	0.679	0.679	0.95	H2	0.678	0.678	0.948	H2	0.683	0.683	0.958	H2	0.679	0.679	0.95	H2	0.848	0.848	1.134	H2	0.784	0.784	1.066	H2	0.735	0.735	1.016	H2	0.751	0.751	1.029	H2	0.749	0.749	1.034	H2	0.736	0.736	1.016	H2
H2O	NSP	1.362	1.46	1.406	H2O	1.169	1.362	1.263	H2O	1.401	1.47	1.431	H2O	1.32	1.434	1.374	H2O	1.169	1.362	1.263	H2O	1.401	1.47	1.431	H2O	1.771	1.669	1.703	H2O	1.58	1.572	1.572	H2O	1.487	1.534	1.507	H2O	1.579	1.572	1.564	H2O	1.6	1.592	1.585	H2O	1.545	1.554	1.54	H2O
HBO	NSP	2.1	2.1	3.171	HBO	1.991	1.991	2.887	HBO	2.142	2.142	3.246	HBO	2.07	2.07	3.113	HBO	1.991	1.991	2.887	HBO	2.142	2.142	3.246	HBO	2.395	2.395	3.451	HBO	2.246	2.246	3.296	HBO	2.201	2.201	3.244	HBO	2.247	2.247	3.295	HBO	2.26	2.26	3.319	HBO	2.238	2.238	3.274	HBO
HBS	NSP	4.211	4.211	6.678	HBS	4.313	4.313	6.522	HBS	4.242	4.242	6.715	HBS	4.205	4.205	6.651	HBS	4.313	4.313	6.522	HBS	4.242	4.242	6.715	HBS	4.76	4.76	7.158	HBS	4.434	4.434	6.853	HBS	4.322	4.322	6.743	HBS	4.418	4.418	6.829	HBS	4.488	4.488	6.902	HBS	4.44	4.44	6.827	HBS
HCCCl	NSP	3.98	3.98	8.157	HCCCl	4.005	4.005	8.165	HCCCl	4.008	4.008	8.182	HCCCl	3.937	3.937	8.048	HCCCl	4.005	4.005	8.165	HCCCl	4.008	4.008	8.182	HCCCl	4.532	4.532	9.251	HCCCl	4.226	4.226	8.868	HCCCl	4.107	4.107	8.721	HCCCl	4.219	4.219	8.849	HCCCl	4.286	4.286	8.937	HCCCl	4.21	4.21	8.806	HCCCl
HCCF	NSP	2.748	2.748	4.774	HCCF	2.805	2.805	4.699	HCCF	2.766	2.766	4.78	HCCF	2.715	2.715	4.71	HCCF	2.805	2.805	4.699	HCCF	2.766	2.766	4.78	HCCF	3.242	3.242	5.325	HCCF	2.979	2.979	5.119	HCCF	2.921	2.921	5.041	HCCF	2.994	2.994	5.123	HCCF	3.038	3.038	5.165	HCCF	2.992	2.992	5.096	HCCF
HCHO	NSP	1.912	2.633	3.288	HCHO	1.864	2.465	3.18	HCHO	1.931	2.678	3.292	HCHO	1.892	2.581	3.257	HCHO	1.864	2.465	3.18	HCHO	1.931	2.678	3.292	HCHO	2.165	3.188	3.748	HCHO	2.033	2.934	3.521	HCHO	1.975	2.84	3.453	HCHO	2.021	2.92	3.513	HCHO	2.039	2.949	3.55	HCHO	2.004	2.888	3.482	HCHO
HCl	NSP	2.458	2.458	2.709	HCl	2.393	2.393	2.661	HCl	2.477	2.477	2.72	HCl	2.431	2.431	2.687	HCl	2.393	2.393	2.661	HCl	2.477	2.477	2.72	HCl	2.917	2.917	3.028	HCl	2.699	2.699	2.877	HCl	2.561	2.561	2.777	HCl	2.677	2.677	2.852	HCl	2.724	2.724	2.892	HCl	2.647	2.647	2.828	HCl
HCN	NSP	2.061	2.061	3.295	HCN	2.066	2.066	3.343	HCN	2.057	2.057	3.236	HCN	2.039	2.039	3.261	HCN	2.066	2.066	3.343	HCN	2.057	2.057	3.236	HCN	2.338	2.338	3.616	HCN	2.188	2.188	3.456	HCN	2.143	2.143	3.437	HCN	2.185	2.185	3.467	HCN	2.214	2.214	3.5	HCN	2.18	2.18	3.466	HCN
HCONH2	NSP	5.189	4.087	2.967	HCONH2	4.604	3.685	2.76	HCONH2	5.218	4.129	3.011	HCONH2	5.064	3.973	2.91	HCONH2	4.604	3.685	2.76	HCONH2	5.218	4.129	3.011	HCONH2	6.056	4.962	3.434	HCONH2	5.598	4.547	3.153	HCONH2	5.468	4.413	3.036	HCONH2	5.604	4.543	3.143	HCONH2	5.672	4.59	3.18	HCONH2	5.51	4.472	3.109	HCONH2
HCOOH	NSP	4.005	3.52	2.401	HCOOH	3.587	3.192	2.236	HCOOH	4.036	3.556	2.428	HCOOH	3.922	3.426	2.354	HCOOH	3.587	3.192	2.236	HCOOH	4.036	3.556	2.428	HCOOH	4.552	4.26	2.763	HCOOH	4.277	3.935	2.571	HCOOH	4.145	3.803	2.47	HCOOH	4.282	3.935	2.563	HCOOH	4.321	3.976	2.586	HCOOH	4.209	3.874	2.53	HCOOH
He	NSP	0.205	0.205	0.205	He	0.196	0.196	0.196	He	0.202	0.202	0.202	He	0.205	0.205	0.205	He	0.196	0.196	0.196	He	0.202	0.202	0.202	He	0.261	0.261	0.261	He	0.245	0.245	0.245	He	0.223	0.223	0.223	He	0.234	0.234	0.234	He	0.233	0.233	0.233	He	0.23	0.23	0.23	He
HF	NSP	0.762	0.762	0.932	HF	0.661	0.661	0.852	HF	0.778	0.778	0.938	HF	0.74	0.74	0.915	HF	0.661	0.661	0.852	HF	0.778	0.778	0.938	HF	0.958	0.958	1.075	HF	0.879	0.879	1.015	HF	0.822	0.822	0.981	HF	0.881	0.881	1.021	HF	0.891	0.891	1.033	HF	0.856	0.856	1.003	HF
HNC	NSP	2.312	2.312	3.475	HNC	2.229	2.229	3.309	HNC	2.322	2.322	3.461	HNC	2.28	2.28	3.443	HNC	2.229	2.229	3.309	HNC	2.322	2.322	3.461	HNC	2.646	2.646	3.842	HNC	2.459	2.459	3.623	HNC	2.381	2.381	3.589	HNC	2.436	2.436	3.639	HNC	2.464	2.464	3.668	HNC	2.424	2.424	3.62	HNC
HOCl	NSP	2.934	2.793	4.21	HOCl	2.796	2.628	4.247	HOCl	2.957	2.825	4.182	HOCl	2.887	2.743	4.184	HOCl	2.796	2.628	4.247	HOCl	2.957	2.825	4.182	HOCl	3.385	3.307	4.56	HOCl	3.167	3.057	4.347	HOCl	3.026	2.889	4.261	HOCl	3.157	3.046	4.354	HOCl	3.2	3.087	4.415	HOCl	3.122	3.003	4.325	HOCl
HOOH	NSP	2.006	2.786	1.855	HOOH	1.819	2.972	1.618	HOOH	2.024	2.717	1.882	HOOH	1.964	2.769	1.803	HOOH	1.819	2.972	1.618	HOOH	2.024	2.717	1.882	HOOH	2.312	3.031	2.24	HOOH	2.167	2.873	2.055	HOOH	2.083	2.869	1.938	HOOH	2.17	2.894	2.055	HOOH	2.19	2.943	2.072	HOOH	2.139	2.879	2.014	HOOH
LiBH4	NSP	4.298	4.298	4.665	LiBH4	4.119	4.119	4.398	LiBH4	4.292	4.292	4.639	LiBH4	4.254	4.254	4.604	LiBH4	4.119	4.119	4.398	LiBH4	4.292	4.292	4.639	LiBH4	5.251	5.251	5.77	LiBH4	4.824	4.824	5.306	LiBH4	4.627	4.627	5.147	LiBH4	4.71	4.71	5.198	LiBH4	4.703	4.703	5.204	LiBH4	4.689	4.689	5.125	LiBH4
LiCl	NSP	3.775	3.775	3.976	LiCl	3.532	3.532	3.646	LiCl	3.819	3.819	4.009	LiCl	3.679	3.679	3.855	LiCl	3.532	3.532	3.646	LiCl	3.819	3.819	4.009	LiCl	4.859	4.859	5.138	LiCl	4.31	4.31	4.605	LiCl	4.159	4.159	4.526	LiCl	4.312	4.312	4.63	LiCl	4.428	4.428	4.774	LiCl	4.317	4.317	4.575	LiCl
LiCN	NSP	3.721	3.873	3.15	LiCN	3.376	3.628	2.941	LiCN	3.67	3.825	3.128	LiCN	3.612	3.791	3.072	LiCN	3.376	3.628	2.941	LiCN	3.67	3.825	3.128	LiCN	4.801	4.603	3.822	LiCN	4.202	4.159	3.431	LiCN	4.238	4.123	3.358	LiCN	4.274	4.197	3.437	LiCN	4.366	4.245	3.486	LiCN	4.21	4.189	3.438	LiCN
LiH	NSP	4.374	4.374	3.81	LiH	3.745	3.745	3.24	LiH	4.006	4.006	3.463	LiH	4.373	4.373	3.795	LiH	3.745	3.745	3.24	LiH	4.006	4.006	3.463	LiH	6.19	6.19	6.249	LiH	5.195	5.195	4.828	LiH	5.058	5.058	5.652	LiH	5.052	5.052	4.788	LiH	5.021	5.021	4.963	LiH	5.047	5.047	4.749	LiH
Mg	NSP	10.591	10.591	10.591	Mg	12.094	12.094	12.094	Mg	10.654	10.654	10.654	Mg	10.692	10.692	10.692	Mg	12.094	12.094	12.094	Mg	10.654	10.654	10.654	Mg	11.534	11.534	11.534	Mg	10.58	10.58	10.58	Mg	11.378	11.378	11.378	Mg	10.99	10.99	10.99	Mg	10.658	10.658	10.658	Mg	11.15	11.15	11.15	Mg
Mg2	NSP	18.401	18.401	32.401	Mg2	20.519	20.519	37.021	Mg2	18.467	18.467	32.39	Mg2	18.533	18.533	32.532	Mg2	20.519	20.519	37.021	Mg2	18.467	18.467	32.39	Mg2	19.68	19.68	37.185	Mg2	18.22	18.22	34.409	Mg2	19.373	19.373	37.982	Mg2	18.836	18.836	35.855	Mg2	18.307	18.307	33.865	Mg2	19.132	19.132	35.949	Mg2
N2	NSP	1.506	1.506	2.184	N2	1.458	1.458	2.228	N2	1.493	1.493	2.109	N2	1.487	1.487	2.164	N2	1.458	1.458	2.228	N2	1.493	1.493	2.109	N2	1.684	1.684	2.385	N2	1.591	1.591	2.278	N2	1.539	1.539	2.25	N2	1.582	1.582	2.286	N2	1.598	1.598	2.305	N2	1.568	1.568	2.28	N2
N2H4	NSP	3.121	3.721	3.157	N2H4	2.93	3.565	2.868	N2H4	3.142	3.776	3.194	N2H4	3.068	3.66	3.086	N2H4	2.93	3.565	2.868	N2H4	3.142	3.776	3.194	N2H4	3.614	4.4	3.885	N2H4	3.363	4.068	3.517	N2H4	3.277	4.01	3.392	N2H4	3.345	4.065	3.495	N2H4	3.384	4.121	3.54	N2H4	3.317	4.033	3.454	N2H4
NaCl	NSP	4.181	4.181	4.843	NaCl	3.853	3.853	4.253	NaCl	4.233	4.233	4.877	NaCl	4.051	4.051	4.634	NaCl	3.853	3.853	4.253	NaCl	4.233	4.233	4.877	NaCl	5.618	5.618	7.911	NaCl	4.904	4.904	6.654	NaCl	4.731	4.731	6.829	NaCl	4.91	4.91	6.905	NaCl	5.045	5.045	7.368	NaCl	4.907	4.907	6.566	NaCl
NaCN	NSP	4.458	4.095	3.467	NaCN	4.127	3.62	3.194	NaCN	4.38	4.017	3.436	NaCN	4.345	3.943	3.365	NaCN	4.127	3.62	3.194	NaCN	4.38	4.017	3.436	NaCN	5.795	5.861	4.356	NaCN	5.07	4.977	3.852	NaCN	5.137	5.1	3.773	NaCN	5.19	5.122	3.868	NaCN	5.295	5.288	3.923	NaCN	5.099	4.941	3.854	NaCN
NaH	NSP	5.81	5.81	8.169	NaH	4.719	4.719	5.688	NaH	5.166	5.166	6.79	NaH	5.765	5.765	7.915	NaH	4.719	4.719	5.688	NaH	5.166	5.166	6.79	NaH	7.438	7.438	11.269	NaH	6.327	6.327	9.69	NaH	6.039	6.039	9.884	NaH	6.137	6.137	9.312	NaH	6.024	6.024	9.639	NaH	6.338	6.338	9.182	NaH
Ne	NSP	0.393	0.393	0.393	Ne	0.35	0.35	0.35	Ne	0.4	0.4	0.4	Ne	0.386	0.386	0.386	Ne	0.35	0.35	0.35	Ne	0.4	0.4	0.4	Ne	0.482	0.482	0.482	Ne	0.452	0.452	0.452	Ne	0.42	0.42	0.42	Ne	0.455	0.455	0.455	Ne	0.459	0.459	0.459	Ne	0.439	0.439	0.439	Ne
NH2Cl	NSP	3.433	3.428	5.002	NH2Cl	3.278	3.25	5.017	NH2Cl	3.46	3.457	5.015	NH2Cl	3.381	3.369	4.969	NH2Cl	3.278	3.25	5.017	NH2Cl	3.46	3.457	5.015	NH2Cl	3.965	4	5.517	NH2Cl	3.7	3.715	5.229	NH2Cl	3.547	3.55	5.125	NH2Cl	3.68	3.693	5.225	NH2Cl	3.731	3.744	5.303	NH2Cl	3.647	3.657	5.201	NH2Cl
NH2F	NSP	2.092	2.415	2.061	NH2F	1.919	2.33	1.899	NH2F	2.104	2.423	2.073	NH2F	2.049	2.39	2.022	NH2F	1.919	2.33	1.899	NH2F	2.104	2.423	2.073	NH2F	2.487	2.708	2.42	NH2F	2.3	2.54	2.252	NH2F	2.206	2.484	2.165	NH2F	2.298	2.547	2.25	NH2F	2.318	2.579	2.27	NH2F	2.264	2.517	2.219	NH2F
NH2OH	NSP	2.652	3.235	2.479	NH2OH	2.403	3.178	2.265	NH2OH	2.676	3.255	2.507	NH2OH	2.591	3.193	2.428	NH2OH	2.403	3.178	2.265	NH2OH	2.676	3.255	2.507	NH2OH	3.186	3.66	2.913	NH2OH	2.92	3.425	2.7	NH2OH	2.809	3.386	2.596	NH2OH	2.913	3.435	2.691	NH2OH	2.943	3.486	2.718	NH2OH	2.876	3.411	2.656	NH2OH
NH3	NSP	2	2	2.242	NH3	1.896	1.896	1.973	NH3	2.021	2.021	2.29	NH3	1.97	1.97	2.178	NH3	1.896	1.896	1.973	NH3	2.021	2.021	2.29	NH3	2.322	2.322	2.972	NH3	2.167	2.167	2.605	NH3	2.114	2.114	2.493	NH3	2.151	2.151	2.584	NH3	2.177	2.177	2.629	NH3	2.132	2.132	2.55	NH3
NH3O	NSP	2.664	2.664	3.702	NH3O	2.355	2.355	3.215	NH3O	2.696	2.696	3.703	NH3O	2.583	2.583	3.56	NH3O	2.355	2.355	3.215	NH3O	2.696	2.696	3.703	NH3O	3.451	3.451	5.037	NH3O	3.077	3.077	4.487	NH3O	2.997	2.997	4.414	NH3O	3.09	3.09	4.502	NH3O	3.146	3.146	4.583	NH3O	3.037	3.037	4.411	NH3O
OCl2	NSP	4.21	7.733	4.625	OCl2	4.015	7.733	4.468	OCl2	4.249	7.561	4.67	OCl2	4.14	7.63	4.564	OCl2	4.015	7.733	4.468	OCl2	4.249	7.561	4.67	OCl2	4.918	8.936	5.187	OCl2	4.563	8.544	4.89	OCl2	4.313	8.318	4.68	OCl2	4.543	8.522	4.87	OCl2	4.605	8.617	4.933	OCl2	4.482	8.447	4.82	OCl2
P2H4	NSP	7.388	10.698	7.412	P2H4	7.305	10.505	7.31	P2H4	7.447	10.837	7.481	P2H4	7.333	10.599	7.349	P2H4	7.305	10.505	7.31	P2H4	7.447	10.837	7.481	P2H4	8.285	12.051	8.414	P2H4	7.828	11.376	7.896	P2H4	7.514	11.001	7.557	P2H4	7.708	11.264	7.773	P2H4	7.763	11.367	7.839	P2H4	7.686	11.224	7.753	P2H4
PH2OH	NSP	4.872	4.949	4.854	PH2OH	4.735	4.661	4.718	PH2OH	4.917	5.015	4.899	PH2OH	4.818	4.866	4.8	PH2OH	4.735	4.661	4.718	PH2OH	4.917	5.015	4.899	PH2OH	5.666	5.7	5.64	PH2OH	5.281	5.323	5.259	PH2OH	5.067	5.154	5.045	PH2OH	5.215	5.302	5.193	PH2OH	5.253	5.331	5.231	PH2OH	5.181	5.245	5.159	PH2OH
PH3	NSP	4.405	4.405	4.616	PH3	4.377	4.377	4.533	PH3	4.434	4.434	4.673	PH3	4.38	4.38	4.572	PH3	4.377	4.377	4.533	PH3	4.434	4.434	4.673	PH3	4.984	4.984	5.523	PH3	4.707	4.707	5.073	PH3	4.526	4.526	4.819	PH3	4.627	4.627	4.972	PH3	4.652	4.652	5.017	PH3	4.603	4.603	4.947	PH3
PH3O	NSP	4.092	4.092	4.918	PH3O	3.841	3.841	4.387	PH3O	4.13	4.13	4.985	PH3O	4.028	4.028	4.789	PH3O	3.841	3.841	4.387	PH3O	4.13	4.13	4.985	PH3O	4.7	4.7	5.629	PH3O	4.43	4.43	5.322	PH3O	4.255	4.255	5.156	PH3O	4.371	4.371	5.268	PH3O	4.388	4.388	5.298	PH3O	4.324	4.324	5.2	PH3O
S2H2	NSP	5.655	8.287	5.626	S2H2	5.531	8.157	5.501	S2H2	5.723	8.375	5.694	S2H2	5.592	8.211	5.562	S2H2	5.531	8.157	5.501	S2H2	5.723	8.375	5.694	S2H2	6.453	9.228	6.425	S2H2	6.028	8.766	5.997	S2H2	5.764	8.489	5.732	S2H2	5.967	8.712	5.937	S2H2	6.052	8.811	6.023	S2H2	5.941	8.662	5.911	S2H2
SCl2	NSP	5.582	10.069	7.038	SCl2	5.386	9.724	6.889	SCl2	5.643	10.091	7.106	SCl2	5.501	9.934	6.964	SCl2	5.386	9.724	6.889	SCl2	5.643	10.091	7.106	SCl2	6.391	11.164	7.808	SCl2	5.966	10.706	7.39	SCl2	5.657	10.352	7.095	SCl2	5.929	10.645	7.357	SCl2	6.014	10.757	7.451	SCl2	5.875	10.551	7.303	SCl2
SF2	NSP	3.173	3.815	3.445	SF2	3.009	3.55	3.228	SF2	3.211	3.832	3.48	SF2	3.116	3.747	3.384	SF2	3.009	3.55	3.228	SF2	3.211	3.832	3.48	SF2	3.978	4.224	3.918	SF2	3.577	4.033	3.686	SF2	3.34	3.903	3.53	SF2	3.585	4.045	3.699	SF2	3.628	4.069	3.729	SF2	3.527	3.984	3.646	SF2
SH2	NSP	3.634	3.57	3.558	SH2	3.568	3.545	3.499	SH2	3.682	3.595	3.588	SH2	3.595	3.546	3.527	SH2	3.568	3.545	3.499	SH2	3.682	3.595	3.588	SH2	4.49	4.025	4.09	SH2	4.044	3.804	3.833	SH2	3.839	3.668	3.672	SH2	4.003	3.758	3.782	SH2	4.085	3.802	3.829	SH2	3.985	3.737	3.758	SH2
SiH3Cl	NSP	5.658	5.658	7.164	SiH3Cl	5.453	5.453	6.749	SiH3Cl	5.657	5.657	7.147	SiH3Cl	5.602	5.602	7.062	SiH3Cl	5.453	5.453	6.749	SiH3Cl	5.657	5.657	7.147	SiH3Cl	6.493	6.493	8.168	SiH3Cl	6.141	6.141	7.792	SiH3Cl	5.841	5.841	7.456	SiH3Cl	6.025	6.025	7.664	SiH3Cl	6.042	6.042	7.657	SiH3Cl	5.958	5.958	7.533	SiH3Cl
SiH3F	NSP	4.231	4.231	3.879	SiH3F	4.012	4.012	3.594	SiH3F	4.215	4.215	3.873	SiH3F	4.187	4.187	3.82	SiH3F	4.012	4.012	3.594	SiH3F	4.215	4.215	3.873	SiH3F	4.969	4.969	4.468	SiH3F	4.685	4.685	4.247	SiH3F	4.436	4.436	4.052	SiH3F	4.58	4.58	4.188	SiH3F	4.564	4.564	4.164	SiH3F	4.508	4.508	4.1	SiH3F
SiH4	NSP	4.589	4.589	4.589	SiH4	4.398	4.398	4.398	SiH4	4.556	4.556	4.556	SiH4	4.555	4.555	4.555	SiH4	4.398	4.398	4.398	SiH4	4.556	4.556	4.556	SiH4	5.37	5.37	5.37	SiH4	5.061	5.061	5.061	SiH4	4.802	4.802	4.802	SiH4	4.917	4.917	4.917	SiH4	4.891	4.891	4.891	SiH4	4.842	4.842	4.842	SiH4
SiO	NSP	4.02	4.02	5.075	SiO	3.999	3.999	4.497	SiO	4.103	4.103	5.272	SiO	3.966	3.966	4.877	SiO	3.999	3.999	4.497	SiO	4.103	4.103	5.272	SiO	4.468	4.468	5.63	SiO	4.182	4.182	5.274	SiO	4.171	4.171	5.175	SiO	4.224	4.224	5.316	SiO	4.236	4.236	5.364	SiO	4.224	4.224	5.283	SiO
SO2	NSP	2.892	5.017	3.382	SO2	2.767	4.652	3.086	SO2	2.924	5.069	3.46	SO2	2.847	4.953	3.298	SO2	2.767	4.652	3.086	SO2	2.924	5.069	3.46	SO2	3.205	5.326	3.819	SO2	3.017	5.098	3.568	SO2	2.903	5.009	3.416	SO2	3.018	5.121	3.581	SO2	3.044	5.173	3.61	SO2	2.984	5.082	3.533	SO2
Be	SP	5.622	5.622	5.622	Be	6.658	6.658	6.658	Be	7.167	7.167	7.167	Be	5.654	5.654	5.654	Be	6.818	6.818	6.818	Be	6.27	6.27	6.27	Be	7.075	7.075	7.075	Be	6.551	6.551	6.551	Be	6.351	6.351	6.351	Be	6.411	6.411	6.411	Be	6.484	6.484	6.484	Be	6.685	6.685	6.685	Be
BeH	SP	5.395	5.395	3.825	BeH	5.434	5.434	3.727	BeH	5.433	5.433	3.769	BeH	5.397	5.397	3.815	BeH	5.411	5.411	3.706	BeH	5.427	5.427	3.761	BeH	6.19	6.19	4.871	BeH	5.876	5.876	4.517	BeH	5.924	5.924	4.333	BeH	5.736	5.736	4.362	BeH	5.648	5.648	4.362	BeH	5.923	5.923	4.493	BeH
BH2	SP	2.832	3.019	2.914	BH2	2.774	2.908	2.836	BH2	2.838	2.991	2.891	BH2	2.823	2.998	2.897	BH2	2.776	2.899	2.838	BH2	2.839	2.989	2.894	BH2	3.374	4.144	3.476	BH2	3.172	3.648	3.239	BH2	3.246	3.903	3.282	BH2	3.094	3.545	3.177	BH2	3.09	3.587	3.2	BH2	3.07	3.448	3.143	BH2
BN	SP	3.144	3.144	4.15	BN	2.779	2.779	3.839	BN	3.453	3.453	2.027	BN	3.064	3.064	4.007	BN	2.901	2.901	3.578	BN	3.103	3.103	3.959	BN	3.534	3.534	4.629	BN	3.405	3.405	4.663	BN	3.449	3.449	4.821	BN	3.386	3.386	4.548	BN	3.509	3.509	4.736	BN	3.537	3.537	4.522	BN
BO	SP	2.246	2.246	2.797	BO	2.073	2.073	2.659	BO	2.309	2.309	2.329	BO	2.206	2.206	2.764	BO	2.125	2.125	2.518	BO	2.298	2.298	2.892	BO	2.548	2.548	3.134	BO	2.476	2.476	3.045	BO	2.4	2.4	2.946	BO	2.456	2.456	3.039	BO	2.498	2.498	3.08	BO	2.489	2.489	3.061	BO
BS	SP	4.341	4.341	6.28	BS	4.295	4.295	6.429	BS	4.496	4.496	5.211	BS	4.31	4.31	6.287	BS	4.4	4.4	6.142	BS	4.382	4.382	6.436	BS	4.87	4.87	6.893	BS	4.644	4.644	6.674	BS	4.509	4.509	7.046	BS	4.599	4.599	6.632	BS	4.711	4.711	6.74	BS	4.655	4.655	6.597	BS
C2H	SP	3.02	3.02	3.871	C2H	2.67	2.67	3.796	C2H	3.181	3.181	4.274	C2H	2.931	2.931	3.845	C2H	3.218	3.218	4.033	C2H	3.236	3.236	3.85	C2H	3.508	3.508	4.325	C2H	3.807	3.807	4.153	C2H	3.951	3.951	4.332	C2H	3.817	3.817	4.144	C2H	4.904	4.904	4.69	C2H	4.427	4.427	4.229	C2H
C2H3	SP	3.435	4.998	3.132	C2H3	3.282	4.826	3.095	C2H3	3.513	5.677	3.456	C2H3	3.391	4.982	3.107	C2H3	3.332	5.196	3.258	C2H3	3.46	4.97	3.188	C2H3	4.036	5.718	3.677	C2H3	3.766	5.441	3.376	C2H3	3.718	5.418	3.33	C2H3	3.711	5.381	3.359	C2H3	3.759	5.45	3.422	C2H3	3.66	5.344	3.369	C2H3
CH2F	SP	2.233	2.55	2.32	CH2F	2.012	2.306	2.182	CH2F	2.234	2.552	2.323	CH2F	2.186	2.497	2.286	CH2F	2.031	2.311	2.192	CH2F	2.241	2.552	2.325	CH2F	3.039	3.002	2.752	CH2F	2.655	2.826	2.569	CH2F	2.634	2.741	2.507	CH2F	2.616	2.806	2.546	CH2F	2.644	2.828	2.567	CH2F	2.481	2.738	2.497	CH2F
CH2NH	SP	3.211	2.523	4.03	CH2NH	3.079	2.518	4.493	CH2NH	3.312	2.733	-0.49	CH2NH	3.163	2.494	4.022	CH2NH	3.078	2.519	4.333	CH2NH	3.242	2.546	4.18	CH2NH	3.712	2.872	4.816	CH2NH	3.467	2.67	4.533	CH2NH	3.387	2.607	4.488	CH2NH	3.445	2.653	4.514	CH2NH	3.481	2.688	4.564	CH2NH	3.424	2.645	4.5	CH2NH
CH2PH	SP	7.611	4.929	5.641	CH2PH	7.28	5.006	5.576	CH2PH	9.06	5.246	5.791	CH2PH	7.674	4.926	5.607	CH2PH	8.087	5.173	5.643	CH2PH	7.426	4.97	5.68	CH2PH	8.309	5.578	6.348	CH2PH	7.887	5.151	5.977	CH2PH	7.778	5.005	5.791	CH2PH	7.866	5.131	5.91	CH2PH	7.947	5.211	5.97	CH2PH	7.886	5.165	5.903	CH2PH
CH2-t	SP	2.106	2.301	2.023	CH2-t	1.955	2.21	1.893	CH2-t	2.106	2.29	2.013	CH2-t	2.081	2.281	2	CH2-t	1.997	2.233	1.901	CH2-t	2.118	2.295	2.02	CH2-t	2.763	2.677	2.542	CH2-t	2.499	2.538	2.348	CH2-t	2.515	2.539	2.341	CH2-t	2.477	2.509	2.316	CH2-t	2.528	2.545	2.356	CH2-t	2.318	2.452	2.196	CH2-t
CH3O	SP	4.181	2.77	3.399	CH3O	3.677	2.625	3.013	CH3O	4.093	2.769	3.324	CH3O	4.072	2.728	3.316	CH3O	3.647	2.62	2.995	CH3O	4.094	2.768	3.312	CH3O	5.296	3.248	4.212	CH3O	5.124	3.008	3.997	CH3O	4.653	2.896	3.744	CH3O	4.909	2.982	3.895	CH3O	4.928	3.002	3.918	CH3O	4.819	2.967	3.819	CH3O
F2	SP	0.946	0.946	1.839	F2	0.831	0.831	1.706	F2	0.937	0.937	2.5	F2	0.922	0.922	1.882	F2	0.823	0.823	2.168	F2	0.963	0.963	1.702	F2	1.116	1.116	1.935	F2	1.044	1.044	1.869	F2	0.97	0.97	1.878	F2	1.047	1.047	1.891	F2	1.053	1.053	1.918	F2	1.019	1.019	1.877	F2
FH-OH	SP	1.886	1.602	2.28	FH-OH	1.704	1.427	1.994	FH-OH	1.894	1.619	2.269	FH-OH	1.846	1.567	2.22	FH-OH	1.701	1.432	1.987	FH-OH	1.893	1.62	2.269	FH-OH	2.284	1.964	4.621	FH-OH	2.138	1.823	5.013	FH-OH	2.005	1.709	2.817	FH-OH	2.118	1.811	3.832	FH-OH	2.139	1.83	4	FH-OH	2.074	1.764	3.49	FH-OH
H2CN	SP	2.262	2.773	3.657	H2CN	2.222	2.65	3.543	H2CN	2.299	2.773	3.84	H2CN	2.234	2.735	3.618	H2CN	2.224	2.653	3.606	H2CN	2.268	2.772	3.597	H2CN	2.581	3.241	4.214	H2CN	2.409	3.025	3.991	H2CN	2.348	2.965	3.9	H2CN	2.39	2.99	3.949	H2CN	2.418	3.019	3.985	H2CN	2.377	2.95	3.901	H2CN
H2O-Li	SP	38.527	33.527	43.727	H2O-Li	41.7	37.1	32.9	H2O-Li	39.527	34.427	41.9	H2O-Li	38.827	33.754	42.227	H2O-Li	41.693	37.163	32.684	H2O-Li	39.454	34.426	41.65	H2O-Li	37.138	31.917	46.878	H2O-Li	32.644	27.835	43.226	H2O-Li	29.543	26.364	35.137	H2O-Li	33.136	28.455	39.923	H2O-Li	31.18	26.745	41.651	H2O-Li	39.656	34.018	38.403	H2O-Li
HCHS	SP	3.891	4.571	6.673	HCHS	3.882	4.478	6.569	HCHS	4.227	4.726	8.288	HCHS	3.879	4.524	6.696	HCHS	4.01	4.529	6.951	HCHS	3.898	4.607	6.498	HCHS	4.363	5.409	7.303	HCHS	4.066	4.948	6.925	HCHS	3.94	4.77	6.832	HCHS	4.047	4.92	6.909	HCHS	4.114	5.014	6.999	HCHS	4.051	4.906	6.908	HCHS
HCO	SP	2.633	2.892	1.93	HCO	2.46	2.936	1.842	HCO	2.497	2.911	1.931	HCO	2.591	2.902	1.905	HCO	2.426	2.819	1.808	HCO	2.653	3.267	1.958	HCO	3.244	3.374	2.242	HCO	2.92	3.066	2.086	HCO	2.931	3.089	2.035	HCO	2.928	3.085	2.066	HCO	2.947	3.099	2.085	HCO	2.846	3.046	2.032	HCO
HCP	SP	4.438	4.438	6.898	HCP	4.531	4.531	6.969	HCP	4.731	4.731	8.446	HCP	4.425	4.425	6.908	HCP	4.629	4.629	7.138	HCP	4.444	4.444	6.802	HCP	5.016	5.016	7.461	HCP	4.65	4.65	7.123	HCP	4.526	4.526	7.037	HCP	4.646	4.646	7.128	HCP	4.726	4.726	7.216	HCP	4.677	4.677	7.151	HCP
HNO	SP	1.589	2.293	2.77	HNO	1.568	2.05	2.886	HNO	1.555	2.185	4.595	HNO	1.571	2.232	2.731	HNO	1.54	2.059	2.795	HNO	1.589	2.318	2.64	HNO	1.835	2.895	3.222	HNO	1.696	2.635	2.974	HNO	1.647	2.507	2.931	HNO	1.698	2.606	3.006	HNO	1.71	2.65	3.033	HNO	1.659	2.598	2.952	HNO
HNS	SP	5.625	3.921	3.436	HNS	5.667	3.674	3.471	HNS	6.799	4.015	3.309	HNS	5.75	3.93	3.313	HNS	5.993	3.87	3.392	HNS	5.296	4.041	3.327	HNS	6.402	4.618	3.874	HNS	5.998	4.272	3.555	HNS	5.953	4.09	3.477	HNS	6.051	4.195	3.568	HNS	6.122	4.287	3.61	HNS	6.032	4.18	3.527	HNS
HO2	SP	1.738	2.702	1.477	HO2	1.549	2.361	1.338	HO2	1.726	2.774	1.503	HO2	1.693	2.65	1.447	HO2	1.543	2.311	1.328	HO2	1.722	2.708	1.494	HO2	2.081	2.992	1.693	HO2	1.917	2.811	1.575	HO2	1.826	2.794	1.504	HO2	1.924	2.843	1.573	HO2	1.943	2.87	1.588	HO2	1.891	2.819	1.543	HO2
HOF	SP	1.516	1.345	2.351	HOF	1.368	1.16	2.682	HOF	1.476	1.296	3.462	HOF	1.483	1.305	2.313	HOF	1.362	1.158	2.476	HOF	1.531	1.365	2.218	HOF	1.749	1.635	2.421	HOF	1.646	1.503	2.317	HOF	1.57	1.397	2.316	HOF	1.65	1.504	2.339	HOF	1.664	1.513	2.375	HOF	1.622	1.466	2.322	HOF
Li	SP	24.304	24.304	24.304	Li	25.208	25.208	25.208	Li	24.413	24.413	24.413	Li	24.327	24.327	24.327	Li	25.234	25.234	25.234	Li	24.457	24.457	24.457	Li	25.293	25.293	25.293	Li	23.016	23.016	23.016	Li	19.851	19.851	19.851	Li	22.612	22.612	22.612	Li	22.35	22.35	22.35	Li	24.608	24.608	24.608	Li
Li2	SP	24.439	24.439	43.918	Li2	28.913	28.913	35.395	Li2	21.846	21.846	39.519	Li2	24.403	24.403	43.439	Li2	26.487	26.487	36.853	Li2	25.023	25.023	38.345	Li2	27.955	27.955	43.275	Li2	25.249	25.249	39.858	Li2	24.495	24.495	38.954	Li2	24.966	24.966	39.979	Li2	24.742	24.742	39.166	Li2	25.938	25.938	39.642	Li2
N	SP	1.077	1.077	1.077	N	1.063	1.063	1.063	N	1.06	1.06	1.06	N	1.067	1.067	1.067	N	1.091	1.091	1.091	N	1.056	1.056	1.056	N	1.322	1.322	1.322	N	1.216	1.216	1.216	N	1.226	1.226	1.226	N	1.239	1.239	1.239	N	1.236	1.236	1.236	N	1.171	1.171	1.171	N
N2H2	SP	3.498	2.068	2.872	N2H2	3.303	2.006	2.669	N2H2	4.313	2.147	3.004	N2H2	3.47	2.039	2.818	N2H2	3.558	2.024	2.708	N2H2	3.366	2.073	2.874	N2H2	4.101	2.337	3.467	N2H2	3.806	2.186	3.173	N2H2	3.755	2.12	3.087	N2H2	3.801	2.165	3.163	N2H2	3.851	2.192	3.204	N2H2	3.776	2.146	3.131	N2H2
Na	SP	24.32	24.32	24.32	Na	28.193	28.193	28.193	Na	24.343	24.343	24.343	Na	24.562	24.562	24.562	Na	28.24	28.24	28.24	Na	24.353	24.353	24.353	Na	23.26	23.26	23.26	Na	20.884	20.884	20.884	Na	30.942	30.942	30.942	Na	23.898	23.898	23.898	Na	20.774	20.774	20.774	Na	30.885	30.885	30.885	Na
Na2	SP	30.434	30.434	55.115	Na2	34.778	34.778	80.06	Na2	29.33	29.33	21.511	Na2	30.672	30.672	52.563	Na2	34.091	34.091	52.942	Na2	29.797	29.797	51.991	Na2	30.899	30.899	52.387	Na2	27.441	27.441	48.168	Na2	29.995	29.995	51.697	Na2	29.048	29.048	49.271	Na2	27.078	27.078	47.643	Na2	30.51	30.51	54.068	Na2
NaLi	SP	27.512	27.512	50.347	NaLi	31.175	31.175	80.047	NaLi	25.885	25.885	-17.121	NaLi	27.584	27.584	47.193	NaLi	30.132	30.132	44.796	NaLi	27.44	27.44	45.451	NaLi	29.56	29.56	55.261	NaLi	26.42	26.42	44.353	NaLi	27.077	27.077	45.844	NaLi	26.957	26.957	44.726	NaLi	25.987	25.987	43.747	NaLi	28.295	28.295	47.086	NaLi
NH	SP	1.329	1.329	1.697	NH	1.257	1.257	1.604	NH	1.326	1.326	1.676	NH	1.312	1.312	1.674	NH	1.286	1.286	1.594	NH	1.321	1.321	1.668	NH	1.608	1.608	2.044	NH	1.483	1.483	1.885	NH	1.458	1.458	1.844	NH	1.478	1.478	1.859	NH	1.488	1.488	1.885	NH	1.42	1.42	1.836	NH
NH2	SP	1.574	1.861	1.918	NH2	1.452	1.774	1.749	NH2	1.584	1.855	1.916	NH2	1.55	1.839	1.878	NH2	1.472	1.774	1.741	NH2	1.588	1.856	1.915	NH2	1.908	2.142	2.419	NH2	1.754	2.012	2.181	NH2	1.708	1.973	2.1	NH2	1.72	1.996	2.152	NH2	1.741	2.022	2.182	NH2	1.67	1.977	2.126	NH2
NO	SP	1.488	1.488	2.193	NO	1.362	1.362	2.269	NO	1.468	1.468	0.516	NO	1.458	1.458	2.202	NO	1.361	1.361	2.208	NO	1.49	1.49	2.281	NO	1.888	1.888	2.572	NO	1.676	1.676	2.379	NO	1.625	1.625	2.37	NO	1.687	1.687	2.402	NO	1.694	1.694	2.418	NO	1.63	1.63	2.365	NO
NOCl	SP	4.695	7.051	3.389	NOCl	4.789	6.781	3.188	NOCl	1.255	5.233	3.543	NOCl	4.743	7.139	3.332	NOCl	4.697	7.083	3.227	NOCl	4.822	6.891	3.445	NOCl	5.27	7.365	3.774	NOCl	4.977	7.031	3.519	NOCl	4.793	6.801	3.357	NOCl	4.97	7.01	3.508	NOCl	5.028	7.092	3.554	NOCl	4.925	6.963	3.476	NOCl
NP	SP	3.517	3.517	5.422	NP	3.688	3.688	5.591	NP	3.364	3.364	7.049	NP	3.494	3.494	5.375	NP	3.571	3.571	5.36	NP	3.554	3.554	5.346	NP	3.92	3.92	5.911	NP	3.673	3.673	5.588	NP	3.576	3.576	5.454	NP	3.679	3.679	5.603	NP	3.725	3.725	5.663	NP	3.681	3.681	5.593	NP
O2	SP	1.21	1.21	2.263	O2	1.157	1.157	2.685	O2	1.168	1.168	1.798	O2	1.193	1.193	2.283	O2	1.111	1.111	2.739	O2	1.221	1.221	6.732	O2	1.377	1.377	2.439	O2	1.287	1.287	2.294	O2	1.236	1.236	2.337	O2	1.292	1.292	2.322	O2	1.303	1.303	2.336	O2	1.264	1.264	2.316	O2
O3	SP	1.745	4.586	2.126	O3	1.587	3.334	1.854	O3	1.744	4.404	2.124	O3	1.709	4.31	2.069	O3	1.674	5.835	1.896	O3	1.738	3.181	2.1	O3	1.953	4.832	2.401	O3	1.829	4.621	2.228	O3	1.749	4.554	2.162	O3	1.83	4.658	2.236	O3	1.846	4.701	2.249	O3	1.798	4.628	2.192	O3
OCl	SP	2.421	2.421	4.171	OCl	2.388	2.388	3.726	OCl	2.432	2.432	4.314	OCl	2.399	2.399	4.111	OCl	2.405	2.405	3.638	OCl	2.521	2.521	4.266	OCl	2.966	2.966	4.525	OCl	2.735	2.735	4.291	OCl	2.59	2.59	4.207	OCl	2.733	2.733	4.312	OCl	2.77	2.77	4.357	OCl	2.692	2.692	4.288	OCl
OF	SP	1.094	1.094	2.033	OF	0.983	0.983	1.951	OF	1.097	1.097	1.834	OF	1.072	1.072	2.005	OF	0.983	0.983	1.938	OF	1.098	1.098	1.9	OF	1.393	1.393	2.245	OF	1.276	1.276	2.151	OF	1.179	1.179	2.093	OF	1.277	1.277	2.161	OF	1.283	1.283	2.183	OF	1.243	1.243	2.132	OF
OF2	SP	1.453	2.953	1.981	OF2	1.267	3.168	1.938	OF2	1.429	2.472	2.211	OF2	1.414	2.92	1.955	OF2	1.266	3.125	1.928	OF2	1.471	2.727	1.963	OF2	1.704	3.231	2.183	OF2	1.593	3.115	2.073	OF2	1.48	3.057	2.001	OF2	1.594	3.13	2.082	OF2	1.6	3.162	2.101	OF2	1.553	3.093	2.049	OF2
OH	SP	1.11	1.11	1.258	OH	0.966	0.966	1.164	OH	1.111	1.111	1.249	OH	1.08	1.08	1.237	OH	0.959	0.959	1.161	OH	1.111	1.111	1.249	OH	1.474	1.474	1.477	OH	1.306	1.306	1.379	OH	1.23	1.23	1.339	OH	1.304	1.304	1.377	OH	1.318	1.318	1.394	OH	1.277	1.277	1.36	OH
P	SP	3.705	3.705	3.705	P	3.783	3.783	3.783	P	3.684	3.684	3.684	P	3.693	3.693	3.693	P	3.785	3.785	3.785	P	3.696	3.696	3.696	P	4.533	4.533	4.533	P	4.161	4.161	4.161	P	4.168	4.168	4.168	P	4.142	4.142	4.142	P	4.217	4.217	4.217	P	3.92	3.92	3.92	P
PH	SP	3.906	3.906	4.364	PH	3.916	3.916	4.327	PH	3.928	3.928	4.386	PH	3.888	3.888	4.339	PH	3.979	3.979	4.346	PH	3.909	3.909	4.386	PH	4.707	4.707	5.037	PH	4.318	4.318	4.729	PH	4.262	4.262	4.596	PH	4.262	4.262	4.65	PH	4.338	4.338	4.712	PH	4.088	4.088	4.574	PH
PH2	SP	4.081	4.411	4.496	PH2	4.067	4.385	4.429	PH2	4.107	4.438	4.527	PH2	4.059	4.389	4.461	PH2	4.137	4.409	4.447	PH2	4.104	4.437	4.532	PH2	4.888	4.993	5.267	PH2	4.467	4.718	4.895	PH2	4.399	4.57	4.69	PH2	4.381	4.639	4.803	PH2	4.451	4.681	4.856	PH2	4.249	4.595	4.758	PH2
S2	SP	4.657	4.657	8.686	S2	4.63	4.63	9.619	S2	4.67	4.67	8.204	S2	4.618	4.618	8.804	S2	4.61	4.61	10.427	S2	4.704	4.704	5.649	S2	5.243	5.243	9.296	S2	4.88	4.88	8.756	S2	4.729	4.729	8.708	S2	4.86	4.86	8.803	S2	4.936	4.936	8.889	S2	4.812	4.812	8.808	S2
SCl	SP	4.389	4.389	7.196	SCl	4.237	4.237	6.809	SCl	4.424	4.424	7.192	SCl	4.323	4.323	7.077	SCl	4.233	4.233	6.796	SCl	4.422	4.422	7.18	SCl	5.19	5.19	8	SCl	4.774	4.774	7.626	SCl	4.522	4.522	7.402	SCl	4.743	4.743	7.599	SCl	4.831	4.831	7.698	SCl	4.702	4.702	7.535	SCl
SF	SP	3.19	3.19	3.604	SF	3.062	3.062	3.364	SF	3.2	3.2	3.603	SF	3.14	3.14	3.539	SF	3.058	3.058	3.369	SF	3.215	3.215	3.608	SF	4.046	4.046	4.03	SF	3.626	3.626	3.833	SF	3.396	3.396	3.718	SF	3.616	3.616	3.835	SF	3.681	3.681	3.873	SF	3.569	3.569	3.78	SF
SH	SP	3.438	3.438	3.449	SH	3.377	3.377	3.41	SH	3.455	3.455	3.466	SH	3.4	3.4	3.425	SH	3.373	3.373	3.415	SH	3.465	3.465	3.469	SH	4.277	4.277	3.929	SH	3.844	3.844	3.698	SH	3.641	3.641	3.567	SH	3.811	3.811	3.656	SH	3.893	3.893	3.707	SH	3.79	3.79	3.627	SH
SO-trip	SP	2.942	2.942	4.351	SO-trip	2.847	2.847	4.583	SO-trip	2.918	2.918	3.948	SO-trip	2.906	2.906	4.379	SO-trip	2.795	2.795	4.347	SO-trip	3.012	3.012	4.784	SO-trip	3.462	3.462	4.721	SO-trip	3.176	3.176	4.452	SO-trip	3.108	3.108	4.432	SO-trip	3.177	3.177	4.478	SO-trip	3.212	3.212	4.517	SO-trip	3.084	3.084	4.453	SO-trip
CN	SP	2.405	2.405	3.782	CN	1.955	1.955	2.762	CN	2.539	2.539	3.322	CN	2.333	2.333	3.546	CN	2.599	2.599	2.975	CN	2.74	2.74	3.441	CN	2.642	2.642	4.279	CN	2.519	2.519	3.975	CN	2.709	2.709	3.945	CN	2.582	2.582	3.986	CN	2.69	2.69	3.998	CN	2.588	2.588	3.928	CN
P2	SP	5.923	5.923	10.155	P2	6.038	6.038	9.868	P2	6.17	6.17	11.094	P2	5.917	5.917	10.163	P2	6.183	6.183	10.423	P2	5.908	5.908	10.058	P2	6.577	6.577	11.035	P2	6.13	6.13	10.458	P2	5.91	5.91	10.192	P2	6.115	6.115	10.458	P2	6.217	6.217	10.604	P2	6.144	6.144	10.475	P2
PS	SP	5.112	5.112	9.373	PS	5.184	5.184	9.637	PS	5.219	5.219	12.027	PS	5.089	5.089	9.332	PS	5.571	5.571	9.251	PS	5.699	5.699	9.465	PS	5.652	5.652	10.223	PS	5.655	5.655	9.609	PS	5.138	5.138	9.493	PS	5.277	5.277	9.608	PS	5.355	5.355	9.742	PS	5.266	5.266	9.562	PS
CH3	SP	2.341	2.341	2.341	CH3	2.258	2.258	2.183	CH3	2.349	2.349	2.375	CH3	2.319	2.319	2.31	CH3	2.275	2.275	2.245	CH3	2.349	2.349	2.378	CH3	2.741	2.741	3.123	CH3	2.569	2.569	2.749	CH3	2.54	2.54	2.815	CH3	2.525	2.525	2.688	CH3	2.552	2.552	2.746	CH3	2.484	2.484	2.54	CH3
NCO	SP	2.284	2.284	4.826	NCO	2.235	2.235	4.843	NCO	2.248	2.248	3.995	NCO	2.261	2.261	4.835	NCO	2.176	2.176	4.38	NCO	2.312	2.312	4.9	NCO	2.504	2.504	5.099	NCO	2.362	2.362	4.917	NCO	2.307	2.307	4.818	NCO	2.355	2.355	4.913	NCO	2.38	2.38	4.956	NCO	2.342	2.342	4.881	NCO
FCO	SP	3.32	2.404	2.027	FCO	3.013	2.191	1.862	FCO	3.12	2.474	2.045	FCO	3.271	2.354	1.987	FCO	2.961	2.134	1.843	FCO	3.398	2.508	2.03	FCO	3.702	2.88	2.378	FCO	3.52	2.629	2.217	FCO	3.451	2.589	2.146	FCO	3.531	2.646	2.204	FCO	3.56	2.659	2.224	FCO	3.463	2.577	2.152	FCO
SiH3	SP	5.013	5.012	4.982	SiH3	4.861	4.861	4.77	SiH3	4.99	4.99	4.954	SiH3	4.983	4.983	4.942	SiH3	4.861	4.861	4.742	SiH3	4.996	4.996	4.96	SiH3	5.794	5.794	6.219	SiH3	5.45	5.45	5.622	SiH3	5.296	5.296	5.629	SiH3	5.326	5.326	5.461	SiH3	5.345	5.345	5.519	SiH3	5.23	5.23	5.233	SiH3
				RMSRE		7.29767	7.53274	10.5107		7.97536	4.62997	20.7679		1.48751	1.54996	1.82863		6.98856	7.24874	8.55114		2.68915	3.96493	17.7549		18.8001	18.3348	20.3277		10.6646	10.449	14.6714		8.36005	8.43042	9.96153		9.64961	9.47676	11.2018		11.8875	11.7392	12.8034		9.37832	9.30457	9.76229
				RMSRE (NSP)		6.50401	6.31683	7.70036		2.01379	1.98333	2.52473		1.46734	1.48102	1.70862		6.50401	6.31683	7.70036		2.01379	1.98333	2.52473		19.2026	18.855	20.1235		10.3551	10.3701	11.1099		6.70022	7.00299	10.077		9.24504	9.28653	10.3813		10.1948	10.2214	11.7647		8.33779	8.28811	9.08149
				RMSRE (SP)		8.22611	8.88256	13.3347		11.9148	6.66836	31.471		1.51364	1.63625	1.97546		7.57908	8.31735	9.55588		3.37798	5.58839	26.8633		18.2569	17.6269	20.5934		11.0587	10.5521	18.332		10.1381	10.0029	9.80757		10.1574	9.7214	12.1975		13.802	13.4785	14.0537		10.5928	10.4931	10.5916
				MRE		-3.15767	-3.06809	-2.89711		0.409748	0.354927	-1.60557		-1.12604	-1.16353	-1.29588		-2.56907	-2.19214	-3.66624		0.664509	0.494234	0.967928		17.2759	16.6705	16.2728		8.72774	8.39674	8.58926		5.71022	5.6476	5.80449		8.16476	7.87465	7.67922		9.1848	8.90094	8.73124		7.77004	7.58681	6.83554
				MAX		18.778	27.3005	58.9906		73.2694	27.4813	134.006		3.1093	6.01832	6.26452		21.2736	27.2351	30.3709		13.9293	30.6367	197.481		43.6282	43.6282	102.675		35.2324	35.2324	119.868		30.8278	30.8278	48.3465		26.3907	26.3907	68.0702		62.3841	62.3841	75.4386		46.5894	46.5894	53.0702
								HF				MP2				CCSD				RHF				RMP2				Slater				SPW92				N12				PBE				BLYP				B97-D
				RMSRE				8.45				11.12				1.62				7.6				8.14				19.15				11.93				8.92				10.11				12.14				9.48
				RMSRE (NSP)				6.84				2.17				1.55				6.84				2.17				19.39				10.61				7.93				9.64				10.73				8.57
				RMSRE (SP)				10.15				16.68				1.71				8.48				11.94				18.83				13.31				9.98				10.69				13.78				10.56
				MRE				-3.04				-0.28				-1.2				-2.81				0.71				16.74				8.57				5.72				7.91				8.94				7.4
				MAX				58.99				134.01				6.26				30.37				197.48				102.68				119.87				48.35				68.07				75.44				53.07
				COMPVAR				3.21				16.14				0.34				1.56				15.07				1.99				4.22				1.6				1.73				1.06				0.46
				COMPME				0.26056				2.01531				0.169842				1.4741				0.473694				1.00305				0.330998				0.156885				0.485544				0.453554				0.934506
[truncated: 220 more columns]

## Sheet: Species Difficulty Analysis
Name	Slater	SPW92	N12	PBE	BLYP	B97-D	SOGGA11	TPSS	t-HCTH	M06-L	M11-L	MN12-L	MN15-L	MGGA_MVS	MGGA_MS2	B97M-V	SCAN	mBEEF	revM06-L	B3LYP	B97	B97-2	PBE0	PBE50	LRC-wPBE	HSEHJS	LRC-wPBEh	HFLYP	SOGGA11-X	camB3LYP	wB97X-D	wB97X-V	rcamB3LYP	TPSSh	M06	M06-2X	M05	M11	MN12-SX	MGGA_MS2h	BMK	MN15	PW6B95	SCAN0	wB97M-V	wM05-D	MGGA_MVSh	M06-HF	DSD-PBEPBE-D3
Be	25.845	16.524	12.967	14.034	15.333	18.908	14.888	14.479	19.246	9.819	6.635	0.765	16.08	16.827	14.799	13.287	17.93	12.54	14.55	14.799	13.945	15.457	14.141	14.514	13.056	14.088	13.821	16.169	10.157	14.568	18.872	14.746	14.319	14.55	12.309	9.552	10.69	11.846	1.334	14.906	5.372	13.447	10.619	16.987	12.665	16.009	16.24	8.84	11.277
H	43.628	35.232	23.688	24.288	24.588	22.339	20.24	17.991	20.99	9.595	19.19	14.393	20.99	13.343	16.192	21.139	15.292	14.093	13.493	17.991	16.942	16.042	16.192	9.445	19.94	16.042	17.841	0.15	10.645	18.441	18.891	17.541	18.741	15.742	17.691	15.292	19.19	16.642	12.294	14.093	12.594	15.442	14.993	10.795	24.438	18.441	8.996	24.588	5.847
CN	11.059	4.864	10.617	6.768	10.222	6.601	1.407	8.261	5.353	2.646	16.281	18.838	16.749	2.235	22.848	14.881	8.027	9.513	13.461	15	16.648	9.083	10.114	8.067	9.32	10.091	10.143	14.649	15.395	16.675	14.491	16.079	16.299	9.891	2.666	11.226	1.584	17.381	14.74	23.905	60.539	10.585	11.47	8.599	21.713	11.172	2.333	24.635	10.239
C2H	14.83	21.689	26.093	21.929	52.381	38.413	14.672	20.556	23.512	4.272	107.641	14.153	15.909	1.534	29.421	25.132	6.88	10.319	8.308	24.328	40.42	20.703	8.726	1.32	5.309	8.994	6.553	5.002	15.597	13.512	13.125	12.159	7.241	14.58	4.293	4.967	8.11	9.568	13.208	18.49	48.683	7.707	15.117	2.097	17.631	10.406	2.409	11.165	11.719
H2O-Li	5.416	13.2	21.495	12.914	16.283	7.28	29.595	11.971	13.106	16.074	34.18	63.118	24.987	11.015	11.261	19.331	7.497	14.073	13.325	12.363	8.542	7.752	8.244	7.811	12.493	8.45	10.704	10.401	7.84	8.709	8.006	8.081	8.344	10.948	3.05	12.515	21.276	22.801	39.663	10.878	9.439	16.584	14.148	4.817	11.284	10.376	13.078	0	4.411
Li2	11.777	5.984	6.528	5.469	6.329	7.529	886.813	5.035	6.841	4.943	7.123	116.848	8.568	8.168	5.984	8.198	7.3	6.045	10.73	7.948	6.753	7.51	7.025	8.523	10.208	6.94	8.827	13.453	4.658	10.929	12.259	11.353	14.068	5.598	4.649	7.086	7.814	18.501	23.052	6.517	76.399	7.327	5.227	7.956	8.942	8.572	8.056	25.422	6.37
Na	4.359	14.128	27.229	1.735	14.581	26.994	61.801	7.981	37.977	45.062	13.22	17.492	9.601	8.376	9.198	13.549	11.801	2.882	41.83	12.146	15.646	23.647	2.648	7.706	10.292	1.735	7.977	0.226	27.607	11.271	21.435	5.506	10.781	8.265	29.79	35.469	23.15	8.956	4.449	9.889	7.841	16.739	6.439	9.441	21.789	9.749	9.844	51.283	3.96
NaLi	8.288	7.599	5.323	6.653	8.818	4.403	41.451	5.859	5.042	6.345	15.166	46.53	4.612	8.677	5.406	4.069	4.9	6.701	10.75	9.092	6.701	5.685	6.781	7.333	9.262	6.685	8.381	11.129	8.024	10.952	7.939	9.559	13.339	6.15	3.323	12.329	1.705	14.239	52.322	5.794	5.449	9.408	7.361	5.613	8.334	3.926	8.083	24.703	5.193
NaH	31.677	12.975	12.541	9.294	10.816	10.311	38.904	0.78	2.062	24.091	19.883	15.727	9.348	6.462	0.309	5.859	4.413	6.224	18.495	3.833	1.976	2.629	3.394	14.282	12.27	3.158	8.639	28.81	19.099	10.031	10.169	14.754	17.256	4.1	18.772	10.817	10.56	22.876	13.211	3.705	18.149	4.139	4.139	6.207	11.08	11.515	14.087	19.73	6.678
Na2	3.118	10.837	3.769	7.163	11.93	1.116	33.256	5.792	5.6	24.523	15.198	31.641	5.149	10.602	4.078	11.295	3.055	5.986	10.721	10.585	6.433	3.27	5.3	4.939	6.76	5.409	6.282	8.019	9.247	11.012	6.552	6.744	12.383	5.877	0.837	14.579	4.69	40.753	12.752	4.372	11.939	9.336	7.5	3.664	7.531	4.478	9.582	13.36	3.033
BF	22.005	12.043	9.347	10.829	11.531	10.351	11.159	7.79	9.199	4.795	12.008	7.365	10.574	5.577	6.995	8.507	7.196	5.757	4.442	7.14	6.757	6.172	6.127	3.663	6.435	6.075	6.166	6.371	4.371	5.981	7.199	5.79	5.021	6.308	5.64	3.883	7.166	3.543	6.661	5.899	3.359	6.138	4.842	4.9	7.072	5.678	4.315	1.599	3.992
H2	23.398	14.649	8.017	10.081	10.027	8.12	104.209	5.753	6.95	3.874	11.7	7.229	8.199	4.24	5.618	7.452	6.308	4.828	4.213	6.941	5.977	5.108	6.321	3.104	8.852	6.187	7.45	1.411	4.667	7.924	6.996	6.91	8.972	4.809	5.441	4.498	7.795	6.201	7.669	4.779	3.586	6.688	5.597	4.361	8.984	7.043	2.429	2.702	2.621
CH2NH	16.484	9.189	7.534	8.639	9.816	8.234	7.391	7.169	7.247	4.036	10.473	7.896	8.575	4.574	5.963	6.852	6.215	5.324	3.993	6.394	5.868	5.032	5.068	3.605	4.412	5.118	4.522	5.288	4.431	5.296	4.978	4.611	4.573	5.909	5.335	4.137	5.879	3.954	7.643	5.095	3.697	5.24	5.137	4.451	6.232	4.272	4.122	3.188	3.44
OCl	19.022	10.719	5.721	10.702	12.049	9.282	29.195	8.34	7.577	6.717	11.807	4.935	6.89	3.65	6.218	6.719	1.411	4.978	2.714	7.178	6.541	5.008	5.474	1.981	5.841	5.509	5.127	7.208	4.216	5.778	5.601	5.082	4.58	6.471	7.123	3.936	6.85	4.145	6.325	4.953	3.817	2.699	5.153	0.999	7.409	5.22	1.405	3.791	4.774
BeH	19.85	12.732	11.086	9.609	8.964	12.865	5.982	8.519	11.677	5.851	15.728	21.953	10.939	4.628	5.214	15.379	6.284	5.765	7.589	5.414	8.681	9.767	5.868	2.907	4.605	5.781	5.474	2.878	6.181	3.89	10.113	5.261	2.341	7.549	5.279	4.561	21.933	5.201	7.719	4.417	3.801	12.22	5.589	4.334	10.184	9.262	3.175	9.011	1.872
Li	4.069	5.3	18.322	6.962	8.04	1.251	33.529	7.814	1.296	5.797	45.383	78.325	0.337	1.222	4.353	8.999	2.399	9.356	6.122	7.916	4.036	1.333	5.579	3.588	3.242	5.583	4.756	3.691	4.555	7.443	7.723	0.901	7.122	7.6	1.424	14.598	8.949	6.542	78.584	3.901	8.176	18.092	14.549	2.962	17.845	4.226	1.477	32.641	4.135
P	22.348	12.308	12.497	11.795	13.819	5.803	6.37	8.637	3.725	0.864	10.526	7.8	7.854	3.752	5.695	11.93	7.206	2.807	2.942	8.826	6.991	3.995	6.748	2.699	4.993	6.856	5.506	2.132	4.345	6.1	5.074	4.885	3.833	6.937	7.638	6.64	5.371	4.211	0.675	4.642	5.425	7.719	6.37	4.804	11.579	5.668	1.781	8.853	1.916
LiH	50.151	21.745	30.695	19.489	21.24	18.981	11.194	7.871	15.855	2.367	62.192	26.468	10.33	3.743	5.939	7.486	7.437	5.321	10.471	7.445	6.787	5.123	4.304	7.054	0.431	4.261	2.036	20.954	4.423	2.419	3.079	4.228	6.575	3.478	2.373	4.054	11.349	8.632	19.142	2.299	7.503	6.171	5.958	1.34	5.323	3.216	7.557	13.263	2.274
CH2-t	25.156	15.41	15.612	14.164	16.175	8.515	2.552	9.855	6.034	0.609	19.732	10.982	13.037	2.915	7.597	11.568	6.054	4.034	1.001	8.713	7.153	5.125	6.058	0.309	5.825	6.087	5.439	7.803	5.207	5.959	5.486	5.744	3.732	7.012	6.631	4.338	6.903	4.757	5.977	5.461	3.959	8.887	6.464	1.866	9.49	4.314	1.302	8.833	1.825
NaCl	46.1	25.797	25.998	28.407	34.508	24.958	16.369	21.806	24.692	2.095	15.194	8.206	11.498	1.225	15.843	16.11	11.229	11.09	1.816	17.393	14.706	10.584	10.528	2.169	4.919	11.056	6.058	13.288	4.416	8.334	5.508	2.526	1.995	15.234	8.431	3.626	19.703	3.189	10.755	10.821	0.816	4.678	12.433	3.116	8.989	3.593	4.621	4.412	3.324
BH2	26.626	15.304	20.253	12.525	13.333	10.556	6.99	7.716	8.934	1.775	14.802	16.745	13.674	3.654	6.22	13.47	5.431	4.561	0.471	7.473	7.534	6.97	6.156	1.346	4.849	6.175	5.309	5.436	5.877	4.967	6.447	5.554	3.072	5.727	6.363	4.332	9.127	6.642	9.112	4.743	2.782	10.974	6.683	2.319	10.436	5.412	1.096	23.764	1.822
He	27.317	19.512	8.78	14.146	13.659	12.195	16.098	8.78	11.707	3.415	0.976	5.854	2.439	6.341	8.78	3.902	7.805	7.317	2.927	8.78	7.805	6.829	7.805	2.439	14.146	7.805	9.756	6.341	4.39	10.244	7.805	9.756	11.707	6.829	5.366	3.902	9.268	6.341	3.415	6.829	2.439	6.341	5.854	3.902	9.756	7.317	2.439	4.878	2.927
Mg2	10.241	3.667	10.84	6.45	2.642	7.106	17.602	11.116	9.59	7.981	21.592	15.284	14.242	14.613	11.006	22.331	8.012	6.748	26.581	2.113	7.496	7.837	6.656	7.57	6.054	6.697	6.273	4.999	7.148	0.271	4.831	5.493	1.768	10.762	13.135	11.425	22.223	2.232	6.187	10.864	1.953	2.029	2.519	7.341	5.61	5.409	13.554	21.36	3.641
N	22.748	12.906	13.835	15.042	14.763	8.728	5.664	12.813	7.335	2.136	17.92	10.121	14.113	3.807	10.492	9.285	6.592	5.571	2.693	7.985	6.128	4.178	7.521	1.671	10.028	7.521	7.892	7.242	3.064	6.592	6.778	6.5	5.478	9.935	3.621	2.6	2.878	6.221	6.314	8.357	2.507	7.892	5.014	2.6	8.264	4.643	0.65	7.799	1.857
BO	12.997	9.804	6.388	9.123	10.865	10.379	10.182	8.063	8.089	3.984	6.972	6.19	7.105	0.757	5.798	8.657	4.376	3.665	1.567	5.265	5.863	5.426	3.047	2.461	4.085	3.018	3.099	8.991	3.489	3.672	4.825	4.514	2.374	5.812	3.072	0.547	5.772	1.181	3.928	3.978	1.273	3.443	3.369	1.433	6.039	4.003	2.401	3.312	3.109
Mg	8.904	0.104	7.431	3.767	0.633	5.278	12.945	8.347	7.044	7.138	37.324	19.469	13.002	13.653	7.129	21.669	5.675	4.126	22.953	1.133	6.043	6.317	5.089	6.704	6.081	4.797	6.1	6.345	6.373	0.746	5.457	6.015	0.198	8.394	12.133	11.387	21.575	3.38	7.365	7.355	0.755	1.001	1.879	5.76	4.154	4.485	13.115	21.764	3.239
C2H4	14.147	6.861	5.593	6.315	7.667	6.6	4.035	5.178	5.597	1.127	9.428	6.865	8.142	2.016	4.694	5.854	5.273	3.714	2.229	5.396	4.828	3.972	4.018	2.676	2.599	4.057	3.273	3.832	3.904	4.413	4.26	3.679	3.75	4.414	3.777	3.247	4.897	2.776	6.194	4.108	2.352	5.01	4.077	4.113	5.564	3.138	2.621	2.175	2.054
HNS	14.936	6.736	4.243	6.349	7.976	5.859	7.465	4.734	4.563	3.757	11.51	6.283	6.577	2.514	4.753	5.195	5.398	4.213	2.834	4.942	4.111	3.302	3.841	4.306	2.935	3.882	3.351	5.344	3.53	4.113	3.564	3.224	4.056	4.004	5.479	2.741	5.689	2.737	6.429	4.511	2.637	2.114	3.498	5.686	5.208	2.979	3.66	1.826	2.516
FH-OH	61.909	70.089	14.596	40.641	44.994	31.718	55.562	21.39	24.449	7.704	5.013	4.176	7.377	4.873	11.906	8.83	9.356	8.766	2.7	7.232	6.794	4.662	4.312	3.691	7.932	4.372	4.589	13.28	0.73	4.891	4.013	4.585	3.542	8.993	4.162	0.381	4.074	0.719	3.261	6.075	0.535	2.626	3.955	0.563	6.33	2.186	2.948	2.484	0.903
AlF	14.225	5.728	7.583	7.35	6.962	7.721	35.989	7.676	7.975	2.521	14.415	18.149	17.628	6.816	6.836	6.806	5.598	5.5	8.359	4.04	5.661	5.391	4.691	3.653	4.872	4.603	4.75	4.057	5.028	2.83	5.302	4.998	1.736	6.671	0.369	0.373	4.033	4.033	7.22	6.089	0.939	5.621	2.95	4.079	2.832	0.738	5.913	3.181	2.91
BN	12.124	9.843	12.243	8.376	12.503	11.443	10.303	8.02	10.016	7.34	14.608	7.417	9.159	16.329	4.01	9.028	14.123	3.689	4.268	7.185	6.876	7.007	2.589	3.937	1.147	2.637	1.782	8.879	4.854	3.971	4.209	4.092	2.098	6.179	5.748	3.798	10.602	2.048	5.716	2.477	1.206	2.434	5.046	15.396	12.741	4.649	17.455	5.295	0.512
C2H2	15.614	7.162	6.424	7.284	9.08	7.757	3.978	6.293	6.366	0.553	9.662	9.328	9.957	0.189	5.376	6.231	4.704	2.909	0.378	6.22	5.802	4.484	4.446	2.097	2.853	4.484	3.676	0.953	4.449	4.795	5.01	4.06	3.591	5.28	3.151	3.307	2.638	3.034	7.31	4.539	2.937	5.328	4.489	3.612	6.501	3.744	0.628	5.365	1.631
Ne	22.646	15.013	6.87	15.776	16.794	11.705	7.379	12.977	9.669	5.344	0.509	3.308	5.852	3.308	10.687	7.634	7.125	6.616	3.817	8.397	7.634	5.344	6.107	2.036	13.232	6.107	7.634	12.723	2.036	8.397	5.852	8.906	8.651	9.415	3.562	1.272	5.344	3.308	2.799	7.634	2.799	4.58	5.344	1.272	9.669	3.817	1.781	0	1.272
NH3O	31.864	17.61	15.082	18.059	20.175	15.905	7.978	14.211	13.649	6.869	14.25	10.814	11.246	4.805	9.71	10.772	9.051	7.189	2.736	7.881	7.127	4.98	4.571	4.605	4.375	4.759	3.131	14.67	0.485	3.222	3.028	1.599	1.157	9.04	6.661	1.159	6.353	1.042	8.387	5.849	1.061	1.12	4.505	0.89	4.368	0.383	2.667	7.431	1.434
OF	23.113	13.991	6.569	14.133	14.735	11.47	6.793	10.595	9.648	6.168	3.817	1.568	7.033	0.426	3.132	6.808	1.904	5.839	2.765	6.679	6.454	4.7	4.751	2.881	9.405	4.751	5.736	10.477	1.946	5.754	5.063	6.264	4.936	7.205	4.851	1.344	5.896	1.038	2.097	1.361	1.792	2.486	4.158	1.793	4.307	3.67	3.991	0.985	2.792
OH	28.599	15.45	9.578	15.28	16.524	13.146	6.385	11.694	10.738	5.804	5.848	4.178	8.943	13.618	11.264	7.955	11.658	12.322	1.774	6.967	6.401	4.458	4.389	4.004	8.21	4.389	5.184	14.669	0.771	5.224	4.861	4.974	3.588	7.734	4.013	0.517	4.418	1.457	3.058	12.48	0.546	1.694	4.032	14.417	6.982	2.408	16.413	11.716	0.758
NH	20.813	11.42	9.371	10.685	11.676	7.323	1.941	7.141	5.928	3.217	10.834	9.095	11.194	3.119	5.475	6.967	5.705	3.359	2.908	5.5	4.366	2.742	3.739	1.801	5.848	3.739	4.102	8.987	0.936	4.247	3.994	3.823	3.193	4.702	7.232	3.757	4.411	3.481	5.335	3.528	1.216	6.217	3.261	1.654	6.273	3.058	1.197	6.101	1.049
HCCF	16.12	8.032	6.07	8.44	9.829	8.229	1.399	7.064	6.811	1.961	10.511	8.09	9.474	1.966	5.712	6.522	5.195	3.495	1.377	6.023	5.942	4.359	4.406	1.146	3.827	4.449	3.822	2.616	3.754	4.492	4.785	4.162	3.184	5.59	2.883	2.482	2.847	2.645	6.254	4.568	2.795	4.015	4.032	3.1	6.45	3.437	0.268	4.23	1.606
CH3	23.803	12.825	13.595	10.697	12.407	6.997	4.306	6.857	5.016	1.052	16.774	9.183	12.257	1.848	4.09	8.115	3.512	1.365	1.344	6.292	5.404	3.697	3.96	1.318	3.35	4.002	3.317	7.533	3.002	3.919	3.932	3.606	2.061	4.551	3.89	4.577	4.41	3.095	5.953	2.461	2.74	7.199	4.859	0.632	7.215	3.255	1.686	10.121	2.07
NO	24.11	11.419	8.845	12.228	12.762	9.012	1.045	8.278	7.107	3.432	9.826	4.449	11.107	2.832	5.738	6.384	6.29	3.913	1.294	5.194	4.831	3.363	3.65	2.965	5.732	3.65	3.895	9.417	1.882	3.743	3.422	4.04	2.714	5.307	4.918	1.699	6.323	2.135	3.575	3.551	1.295	3.212	3.156	7.479	6.474	2.44	2.502	1.849	2.14
CH2F	25.585	14.018	12.159	12.778	13.796	8.868	5.111	8.555	6.719	2.525	12.63	8.27	10.977	2.138	6.268	8.973	4.519	3.46	1.599	6.086	5.685	3.897	4.014	2.71	4.856	4.055	3.66	10.75	2.498	3.708	3.763	3.82	1.776	5.475	4.901	2.79	5.307	1.734	5.609	3.916	1.796	4.92	4.279	0.681	7.114	2.678	2.584	2.943	1.37
SF	22.948	11.747	5.58	11.515	13.286	10.102	42.018	8.365	7.754	6.666	18.608	6.88	7.468	8.322	5.627	7.48	5.886	3.498	1.878	6.864	6.092	4.405	4.643	1.784	3.896	4.724	3.733	8.234	2.767	4.182	4.52	3.009	1.922	5.962	6.385	2.52	6.741	1.799	7.262	3.879	2.14	0.876	4.315	8.393	6.229	4.1	10.434	1.621	1.58
CH3O	22.957	17.244	9.15	13.841	14.405	12.057	7.142	9.894	10.698	5.643	7.827	4.699	8.34	6.373	6.237	7.567	7.613	6.129	4.518	6.62	6.591	5.348	4.511	2.713	5.893	4.619	3.991	11.281	2.038	4.13	3.866	3.423	1.906	6.578	4.491	1.702	5.526	0.881	5.522	3.757	1.932	3.047	4.998	1.51	5.236	3.716	1.761	5.838	0.429
F2	14.979	8.511	2.406	8.869	9.562	6.413	4.803	6.585	4.907	2.572	4.804	2.332	3.671	1.494	4.819	3.756	4.054	3.049	0.923	4.115	3.417	2.122	2.669	5.576	6.175	2.596	3.225	15.324	3.542	4.101	2.844	4.373	4.371	4.207	2.844	3.148	3.231	2.522	4.157	3.463	3.031	2.795	2.835	4.068	5.666	2.07	3.388	6.31	0.716
NaCN	33.748	16.08	17.438	18.551	21.403	15.897	13.28	12.828	15.246	3.333	10.183	7.385	9.601	1.265	7.952	9.306	6.042	5.805	2.983	8.268	7.033	4.888	4.479	4.25	2.859	4.621	2.815	12.63	1.123	3.152	2.257	1.013	0.627	7.755	5.084	0.636	11.152	2.478	6.167	4.545	2.749	3.241	5.679	0.315	4.772	1.132	5.655	2.668	0.606
PH	18.964	9.874	8.05	8.348	10.136	4.711	9.779	5.325	2.995	1.766	8.155	7.783	7.981	1.458	3.451	6.848	4.171	1.721	1.074	6.079	4.626	2.63	4.127	0.717	2.63	4.207	3.112	3.217	2.443	4.02	3.374	2.984	2.262	3.957	4.928	5.091	3.66	3.701	3.8	2.54	3.018	6.154	4.131	2.221	7.947	3.996	1.143	9.319	1.789
C2H3	16.497	8.796	7.713	7.655	9.246	7.026	2.875	5.652	5.627	0.941	10.466	7.971	9.238	1.475	4.632	6.671	4.012	3.109	1.771	5.544	4.907	3.816	3.658	1.266	2.407	3.715	2.846	3.697	3.406	3.979	3.962	3.345	2.745	4.298	3.888	3.306	4.398	2.019	6.57	3.66	2.064	5.31	4.07	2.012	5.977	3.116	1.691	2.335	1.547
HF	22.794	13.55	7.11	13.892	15.173	10.991	20.09	11.118	8.634	6.28	3.95	4.622	6.811	1.838	8.564	7.058	6.442	4.869	2.115	6.493	5.729	3.69	4.034	3.93	9.179	3.935	5.024	14.107	0.433	5.657	4.537	5.612	4.881	7.356	4.11	0.643	3.656	0.495	3.039	5.489	0.996	2.264	3.542	0.214	7.205	2.169	3.596	3.468	1.485
LiCl	28.886	14.742	11.522	15.003	18.269	14.597	11.031	11.309	11.525	2.091	15.308	6.966	8.196	0.477	7.09	8.199	6.787	3.362	0.992	8.909	7.628	5.308	5.053	2.663	3.313	5.21	3.435	11.501	1.408	4.41	4.877	1.815	0.568	7.68	6.124	1.857	6.248	3.389	7.241	4.39	0.555	3.953	5.883	1.493	6.124	3.747	3.961	2.353	2.246
HCCCl	13.719	7.127	4.767	6.93	8.36	6.585	9.858	5.571	5.382	2.61	9.133	5.632	5.93	2.019	3.886	4.507	4.097	2.582	1.456	5.169	4.737	3.417	3.589	1.019	2.273	3.681	2.666	2.467	2.974	3.572	3.476	2.65	2.17	4.396	3.805	2.535	3.453	3.065	6.02	3.011	2.259	2.603	3.574	2.495	5.07	2.975	1.814	3.434	1.249
SH	21.485	10.505	5.21	9.512	11.637	8.875	47.587	6.715	6.648	4.587	15.912	6.223	5.981	13.053	4.117	5.781	10.901	2.013	0.768	6.556	5.491	3.889	4.198	0.236	2.531	4.277	3.089	5.264	2.871	4.172	4.27	2.291	2.114	4.913	5.589	2.388	6.155	2.029	7.505	2.835	2.276	1.967	4.255	12.175	5.84	3.724	14.161	1.47	1.468
BeH2	20.102	11.931	7.4	9.263	7.978	8.36	1.935	5.518	7.488	3.393	2.861	8.781	4.962	3.648	4.671	3.985	6.075	3.753	2.066	4.13	4.496	4.314	4.619	0.673	5.718	4.511	5.144	6.769	1.19	3.199	5.348	3.257	2.279	4.173	2.582	1.958	3.191	3.15	2.768	3.52	0.992	4.736	3.822	2.933	5.137	5.537	1.478	6.78	0.879
NOCl	9.981	4.118	2.437	3.957	4.978	3.273	3.951	2.752	2.481	2.834	4.387	2.507	2.495	4.186	2.211	2.529	2.461	3.007	4.502	2.666	2.42	2.282	2.231	3.061	2.235	2.22	2.215	5.532	2.066	2.215	2.278	2.02	1.79	2.309	2.497	1.651	2.833	2.043	2.415	2.275	2.211	1.795	2.14	2.656	3.245	2.051	5.066	2.657	2.157
HNO	19.96	10.361	6.688	10.099	11.41	8.935	2.643	7.475	7.503	4.408	9.49	4.917	8.271	4.266	5.367	6.44	5.973	4.456	2.732	4.864	4.361	2.958	3.199	3.46	3.489	3.246	2.865	9.919	0.938	3.176	2.349	2.137	2.878	4.935	3.506	0.417	4.759	1.092	4.4	3.774	0.384	1.416	2.684	3.935	4.132	1.323	2.077	4.052	1.018
BHF2	17.549	10.88	5.253	10.305	10.457	7.945	14.796	7.349	6.578	3.176	3.084	3.07	6.425	1.315	5.99	5.34	4.655	3.961	1.838	4.33	4.065	2.647	3.037	3.077	6.027	3.051	3.499	11.774	0.655	3.366	3.056	3.385	2.545	4.741	1.891	0.799	2.023	2.139	1.914	3.791	0.345	2.92	2.675	0.795	4.878	2.331	2.903	4.541	1.185
BS	11.435	6.753	7.719	5.833	8.143	6.586	9.801	4.396	4.696	1.369	10.165	5.978	5.516	1.543	2.734	4.902	2.68	0.679	1.026	5.062	4.588	3.559	2.734	0.369	1.441	2.806	1.941	2.355	3.327	3.52	3.762	3.011	2.182	3.378	2.963	1.97	2.9	2.889	5.54	1.988	2.124	3.602	3.29	1.58	5.622	3.993	2.072	4.631	2.077
H2O	22.752	12.308	7.338	12.096	13.53	10.211	28.531	9.394	7.849	4.797	6.223	6.12	7.449	1.282	6.458	6.3	5.652	3.17	0.679	5.317	4.561	2.743	2.811	4.431	5.553	2.811	3.195	13.528	0.091	3.58	3.373	2.895	1.946	5.897	3.668	1.31	2.451	0.945	3.824	3.739	0.297	1.522	2.677	0.246	5.109	1.12	4.141	3.663	1.568
CH2BH	16.49	6.974	6.667	6.742	8.316	7.722	0.641	5.588	6.383	0.937	11.026	9.328	10.265	0.745	4.615	6.146	4.465	2.633	1.276	5.22	4.757	3.928	3.615	1.22	1.48	3.661	2.493	2.197	3.292	3.346	4.088	2.436	1.789	4.478	2.925	2.083	3.905	1.877	6.84	3.806	1.032	4.919	3.668	3.012	4.831	2.429	1.326	1.57	1.894
HCl	16.694	8.77	3.716	7.887	9.658	6.771	142.716	5.581	4.782	3.066	9.94	3.425	3.707	0.896	3.128	3.715	3.755	1.163	1.024	5.367	4.473	2.741	3.297	0.622	3.013	3.343	2.773	5.034	2.19	3.958	3.7	2.539	2.666	4.016	4.668	2.001	3.723	3.395	5.21	2.011	2.063	1.429	3.277	1.492	5.263	3.467	2.222	2.027	1.277
Ar	15.606	8.874	3.427	8.262	9.976	6.487	6.12	5.998	4.406	3.488	5.202	0.245	2.754	0	3.244	3.427	3.305	1.346	0.306	5.753	4.835	2.876	3.611	0.306	4.468	3.672	3.55	5.018	2.02	4.774	4.162	3.733	3.978	4.406	4.223	2.264	3.672	3.856	2.876	2.142	2.938	1.53	3.55	1.163	5.875	4.1	1.897	2.448	1.285
LiBH4	22.689	12.759	8.64	10.236	10.183	9.359	5.806	5.623	8.417	1.065	8.115	7.657	5.818	1.991	4.366	5.689	5.224	3.416	3.075	5.07	4.684	4.107	4.341	0.437	3.22	4.417	3.354	7.395	1.845	2.979	3.524	1.812	1.208	3.832	4.049	2.095	5.53	3.06	3.737	2.93	0.031	3.7	3.874	1.998	4.122	2.962	0.965	6.562	1.033
SiO	11.075	3.994	3.271	4.968	5.482	4.771	1.749	3.787	3.833	1.626	6.144	6.928	9.469	1.445	3.306	4.189	2.784	2.158	3.017	2.002	2.397	1.944	1.79	3.742	1.893	1.749	1.947	8.924	2.487	1.612	2.593	2.402	2.608	2.508	1.268	2.799	1.986	2.797	2.661	2.475	2.184	2.876	1.119	2.397	1.948	1.81	3.015	5.705	1.899
BH2F	16.979	10.108	5.501	8.783	8.745	7.244	15.197	5.702	6.34	2.056	4.808	4.607	8.633	1.738	4.706	5.865	4.434	3.812	2.192	4.11	3.904	2.969	3.324	1.659	5.114	3.322	3.58	8.511	1.119	3.343	3.391	3.21	2.711	3.86	1.633	0.888	1.947	4.834	2.759	3.156	0.655	4.243	2.969	1.269	4.876	3.324	1.749	4.921	1.131
SF2	17.768	9.013	3.611	9.297	10.294	7.706	29.654	6.741	5.98	5.013	11.255	4.814	5.986	2.07	5.098	5.642	4.634	3.239	1.569	4.684	4.261	2.861	3.173	2.419	3.532	3.217	2.711	8.628	1.654	2.827	2.965	2.357	1.265	4.526	4.289	1.432	4.452	1.073	4.519	3.4	1.361	0.421	2.529	1.673	4.538	2.286	2.523	2.449	1.241
NH2	21.296	11.323	8.139	9.79	11.208	8.034	1.872	6.896	6.297	2.062	7.968	6.29	8.71	0.62	4.288	5.202	4.142	2.318	0.678	4.835	4.01	2.511	2.62	3.147	3.812	2.643	2.577	10.225	0.864	3.168	2.95	2.368	1.817	4.371	4.169	1.954	3.189	1.376	5.238	2.421	0.266	4.143	2.851	0.823	5.134	1.739	3.135	4.365	0.771
SH2	17.709	8.756	4.067	7.538	9.206	6.995	22.219	5.105	5.188	2.14	12.265	4.329	4.587	0.951	2.81	4.068	3.695	0.779	1.666	5.143	4.202	2.836	3.237	0.366	1.892	3.303	2.306	4.461	2.117	3.35	3.185	1.708	1.832	3.672	3.779	2.31	4.209	2.822	5.286	1.806	1.451	1.91	3.147	1.594	4.653	3.104	1.816	2.347	1.457
CSO	9.273	3.283	2.13	3.276	4.494	3.085	10.982	2.298	2.196	2.632	6.101	3.259	3.338	4.344	2.184	2.474	2.366	2.83	4.059	2.551	2.362	2.136	2.098	3.145	1.346	2.101	1.853	5.462	2.352	1.949	2.156	1.776	1.486	2.037	2.013	1.834	2.338	1.794	3.393	2.207	2.079	1.744	1.946	2.748	3.251	2.029	4.886	3.837	0.525
HCN	12.331	5.768	4.092	5.763	7.046	5.586	2.219	4.526	4.366	1.251	5.158	4.66	6.095	1.55	3.527	3.705	2.785	1.834	0.966	4.108	3.651	2.605	2.672	0.387	2.717	2.682	2.52	2.604	2.279	3.357	3.208	3.139	2.729	3.417	1.987	1.851	1.88	1.937	4.187	2.647	1.286	3.449	2.679	1.424	4.871	2.785	2.226	2.742	0.593
NH3	22.939	11.57	7.965	10.75	12.31	9.589	14.558	7.954	7.162	2.075	8.962	5.792	7.101	0.851	5.167	5.739	5.162	2.063	1.179	5.032	4.292	2.641	2.674	3.55	2.877	2.7	2.24	11.114	0.446	2.659	2.838	1.313	0.945	5.02	2.703	0.994	2.723	1.375	4.692	2.88	0.675	1.728	2.715	0.243	4.037	1.009	3.685	3.797	1.4
HCO	18.953	8.57	8.248	8.558	9.273	6.37	1.532	5.573	4.962	0.938	8.582	6.281	8.718	2.074	4.614	6.427	4.32	3.289	1.577	3.956	3.412	2.173	2.6	2.06	2.929	2.629	2.316	6.877	0.891	2.504	2.475	2.428	1.796	3.553	2.983	1.638	3.307	1.19	3.686	3.129	0.547	3.661	2.234	1.72	4.89	1.721	2.012	3.006	1.943
CO2	8.795	3.675	1.539	3.932	4.752	3.103	5.563	2.728	2.169	2.622	3.667	3.415	3.485	3.725	2.527	2.602	2.196	2.325	3.868	1.944	1.946	2.07	1.966	4.729	1.757	1.966	1.784	9.965	2.834	1.662	1.948	1.862	1.513	1.887	2.347	2.338	2.539	1.833	2.687	2.188	2.441	1.34	1.786	3.459	2.659	1.635	5.537	1.688	0.475
HCHO	16.484	8.582	5.711	8.127	9.159	7.112	1.75	6.014	5.938	1.766	8.088	4.979	6.992	2.682	4.162	5.294	3.896	3.084	2.168	4.129	3.641	2.464	2.566	1.746	2.653	2.616	2.056	6.783	1.001	2.599	2.207	1.911	1.542	3.993	1.855	0.868	2.726	0.404	4.865	2.645	0.204	2.042	2.445	0.787	3.855	1.516	1.991	3.863	1.19
CH3F	15.703	9.116	5.087	8.274	8.74	6.943	6.938	6.148	5.91	1.635	7.566	4.44	6.52	1.741	4.546	5.057	4.071	3.265	1.713	4.202	3.839	2.731	3.008	1.34	3.961	3.06	2.874	6.941	1.366	3.14	2.8	2.69	2.309	4.28	1.835	1.727	2.692	1.403	4.689	3.045	0.885	3.059	2.864	1.137	4.49	2.431	1.432	3.318	1.084
BH3	17	9.819	6.006	7.461	7.24	6.598	8.247	4.204	6.136	1.278	5.21	5.277	8.914	1.734	3.285	5.774	3.968	3.247	0.79	4.112	3.854	3.351	3.738	0.578	4.261	3.735	3.749	4.37	1.717	3.572	3.749	3.137	3.152	3.153	1.701	1.478	1.947	6.635	3.261	2.418	0.938	5.359	3.535	2.038	5.005	3.932	0.114	47.914	1.002
N2H2	17.278	8.562	6.227	8.159	9.512	7.274	2.462	6.107	5.951	3.232	9.028	5.627	6.739	2.964	4.206	5.033	4.695	3.626	2.329	4.418	3.753	2.615	2.624	1.879	2.128	2.699	1.904	6.397	1.34	2.667	2.165	1.757	1.643	4.129	3.761	0.91	4.168	0.575	5.327	2.825	0.64	1.862	2.63	1.758	3.827	1.281	2.939	2.362	0.508
CH3OH	16.25	8.989	5.559	8.143	8.881	7.031	9.642	6.129	5.968	1.789	7.793	4.716	6.448	1.248	4.197	5.062	3.971	2.809	0.676	3.985	3.535	2.415	2.567	1.837	2.801	2.63	2.104	7.431	0.783	2.484	2.191	1.738	1.297	4.124	1.879	0.93	2.346	0.726	4.564	2.637	0.307	2.34	2.583	0.694	3.796	1.543	1.775	3.625	1.031
FCO	16.576	8.401	6.035	8.524	9.296	6.01	5.225	5.683	4.53	1.108	4.082	4.032	6.337	1.533	4.544	5.065	2.203	2.204	1.722	3.435	2.965	1.512	1.866	3.719	3.623	1.851	2.003	10.346	1.016	2.238	1.933	2.47	1.308	3.305	2.393	1.854	1.962	1.07	1.802	2.645	0.972	1.994	1.561	1.782	4.961	1.213	3.826	1.997	1.248
LiCN	23.472	10.02	9.632	11.163	12.994	10.374	6.091	7.381	8.843	2.668	8.081	5.787	7.572	1.779	4.007	5.151	3.574	2.35	2.754	4.441	3.737	2.435	1.969	4.37	2.137	1.973	1.579	11.299	0.591	1.566	2.021	0.8	0.922	4.089	3.591	0.901	5.229	1.948	4.156	1.786	2.564	3.005	2.591	1.143	3.505	1.224	5.357	2.73	0.149
CH2PH	11.755	4.793	2.18	4.113	5.362	4.38	2.549	2.629	3.318	0.689	8.586	5.936	5.509	1.758	2.015	3.339	2.329	1.012	1.942	3.465	2.72	2.086	2.228	1.136	0.837	2.286	1.435	1.802	2.469	2.614	2.461	1.925	2.048	2.07	2.592	1.738	2.865	2.156	5.071	1.66	0.788	3.097	2.098	1.544	3.816	2.025	1.701	2.714	0.768
CH4	15.293	8.656	4.988	6.76	7.214	5.936	4.411	4.493	5.07	0.701	7.049	3.586	6.142	0.907	3.05	4.534	3.627	2.391	0.165	3.998	3.545	2.638	3.009	0.165	2.927	3.05	2.679	4.369	1.566	3.174	2.885	2.308	2.514	3.298	0.783	2.391	2.721	2.267	3.998	2.143	1.278	4.04	3.05	1.649	4.411	2.762	0.783	2.556	1.154
CH3BH2	16.147	9.627	5.905	7.675	7.619	6.665	7.071	5.015	6.061	0.822	6.409	5.019	7.342	1.861	3.476	5.233	4.211	3.318	0.798	3.904	3.716	2.948	3.263	0.435	2.751	3.33	2.628	5.731	1.316	2.584	2.594	1.849	1.613	3.588	1.102	1.559	1.968	3.544	3.728	2.362	0.833	4.424	3.32	1.705	3.925	2.535	0.737	40.939	0.861
ClF	14.989	7.861	2.635	7.694	8.964	6.218	11.34	5.529	4.495	3.963	8.932	2.014	3.447	1.623	3.353	3.755	3.478	1.707	1.039	4.469	3.855	2.357	2.815	1.396	3.304	2.851	2.566	6.362	1.525	3.184	3.018	2.524	2.052	3.797	4.162	1.094	3.919	2.005	3.597	2.086	1.285	0.235	2.48	0.953	4.728	2.635	2.124	1.144	1.04
HBO	12.552	6.116	4.146	6.145	6.779	5.684	10.437	4.453	4.575	2.316	5.447	4.693	5.993	1.321	3.443	3.964	2.605	1.771	0.799	2.795	2.69	1.969	1.898	3.111	2.768	1.895	2.016	9.228	1.663	1.918	2.617	2.19	1.363	2.869	1.819	1.19	1.386	0.498	2.683	2.284	1.459	1.473	1.332	1.589	3.329	1.596	3.229	2.315	1.46
PH2	16.923	8.498	5.548	6.516	7.827	4.772	9.87	3.578	3.437	1.545	7.948	6.973	6.624	0.621	2.198	4.854	2.605	0.755	1.321	4.469	3.394	2.215	2.922	0.139	1.555	2.99	2.016	3.656	1.645	2.899	2.559	1.853	1.59	2.476	3.482	3.506	3.215	3.669	4.671	1.42	1.416	4.639	2.915	1.058	5.471	2.857	1.496	6.258	1.541
HCOOH	16.89	8.855	5.327	8.801	9.822	7.21	11.958	6.416	5.785	2.485	5.96	3.967	5.587	1.924	4.219	4.843	3.382	2.557	2.397	3.497	3.03	1.766	1.787	4.218	2.346	1.865	1.305	11.178	1.409	1.627	1.415	1.169	0.859	3.8	2.045	1.454	2.002	1.596	3.246	2.25	1.527	1.087	1.767	1.661	2.907	0.914	4.161	3.855	0.696
O3	10.617	3.949	1.066	4.202	4.942	2.563	3.318	2.2	1.319	1.561	1.758	1.529	1.202	2.954	2.161	1.576	1.798	2.298	2.561	1.51	1.207	1.501	2.077	7.971	2.03	2.027	2.179	18.982	3.727	2.162	1.77	2.005	3.502	1.4	1.072	2.692	1.221	1.432	1.28	3.36	3.124	1.377	1.936	6.37	4.382	1.991	4.252	2.945	5.171
HOOH	15.714	7.967	3.814	8.126	9.179	6.547	19.495	6.139	4.984	3.115	5.521	3.949	4.894	1.992	4.186	3.903	3.394	2.164	0.868	3.405	2.723	1.366	1.534	4.344	3.353	1.546	1.609	11.399	1.704	2.396	1.683	2.05	1.881	3.705	2.537	2.007	1.437	1.498	4.095	2.651	1.521	1.559	1.825	2.125	3.963	0.754	3.622	4.73	0.505
HOF	15.384	8.438	3.154	8.527	9.172	6.617	11.405	6.199	5.212	3.328	3.182	1.167	3.681	3.508	3.71	3.378	2.876	1.909	2.122	2.927	2.646	1.546	1.552	4.315	4.639	1.552	2.085	11.926	1.024	2.049	1.764	2.19	1.274	3.545	1.843	1.784	2.051	1.377	1.554	1.683	1.12	0.662	1.014	1.536	3.583	1.123	4.059	3.818	1.859
HCP	11.631	4.331	1.994	4.284	5.93	4.88	19.454	3.068	3.487	1.183	8.996	8.523	7.091	2.153	2.241	2.957	1.997	0.532	1.16	3.992	3.244	2.427	2.493	0.982	0.974	2.541	1.711	1.797	3.218	2.939	2.938	2.235	2.034	2.507	2.809	2.249	1.438	1.536	6.712	1.844	1.261	3.822	2.386	1.743	4.5	2.897	1.971	5.463	0.699
CH3Cl	13.516	7.136	3.428	6.167	7.32	5.435	4.79	4.426	4.211	0.581	8.167	3.374	3.892	0.394	2.53	3.323	3.048	1.321	0.798	3.926	3.309	2.077	2.425	0.715	1.809	2.501	1.758	4.338	1.489	2.638	2.404	1.593	1.557	3.147	2.794	1.938	2.926	2.342	4.788	1.605	0.805	1.778	2.632	1.123	4.007	2.281	1.707	0.992	0.919
SiH3	19.172	10.286	8.806	7.543	8.25	4.584	8.16	3.129	3.286	0.891	4.673	6.742	3.897	0.958	2.487	18.565	2.963	1.181	2.981	4.314	3.34	2.419	3.243	0.423	1.58	3.338	2.098	5.706	1.971	2.397	2.257	1.572	0.961	1.908	3.678	1.867	3.962	3.716	3.213	1.516	1.514	4.146	3.022	0.873	5.439	2.189	2.082	6.872	0.66
PH3	15.616	8	3.388	6.063	6.791	5.533	9.973	3.27	4.446	1.255	9.122	4.209	4.937	0.313	2.158	3.799	2.955	0.944	1.817	3.857	3.019	2.411	2.831	0.128	1.623	2.902	1.975	3.689	1.522	2.643	2.396	1.419	1.651	2.331	1.755	1.676	2.377	4.369	3.661	1.441	0.456	2.749	2.396	1.435	3.567	2.588	1.261	1.99	1.082
HCHS	13.813	5.846	2.956	5.381	7.086	5.261	1.806	3.742	3.833	1.07	10.918	5.158	4.85	1.931	2.61	3.702	2.845	1.415	1.803	4.101	3.274	2.125	2.373	0.597	0.962	2.441	1.484	3.471	2.165	2.754	2.544	1.676	1.806	2.726	3.312	1.849	3.369	1.493	5.807	1.872	0.67	1.923	2.43	1.413	4.271	2.252	1.997	2.578	0.827
H2CN	15.446	8.331	5.96	7.235	8.301	6.086	1.473	4.874	4.845	1.43	6.403	4.57	7.048	1.62	3.092	4.543	2.885	2.194	1.516	3.996	3.492	2.409	2.405	1.429	2.569	2.45	2.066	5.338	1.345	2.781	2.535	2.315	1.86	3.239	2.636	1.747	2.945	1.058	4.329	1.911	0.982	3.366	2.608	0.457	4.396	2.107	2.378	1.462	0.455
OCl2	14.972	8.429	4.641	8.057	9.364	6.947	20.935	6.036	5.596	4.17	9.209	2.639	3.531	1.61	3.68	4.185	4.494	3.033	1.491	4.501	3.864	2.478	2.667	1.558	1.593	2.813	1.528	5.451	1.389	2.337	2.107	1.274	0.919	4.094	4.113	0.914	3.777	1.058	4.034	2.504	1.217	0.416	2.728	1.601	3.66	1.756	2.149	1.027	0.588
SCl	16.238	7.95	2.975	7.336	9.156	6.427	41.875	4.887	4.524	3.548	13.992	3.532	3.525	0.664	2.326	3.5	3.007	0.93	1.408	4.638	3.793	2.222	2.494	1.732	1.303	2.609	1.493	6.682	1.329	2.461	2.419	4.634	0.732	3.248	4.406	1.547	3.532	1.239	5.682	1.204	1.075	0.317	2.596	5.623	4.194	2.632	7.967	3.535	0.802
N2H4	19.272	9.611	6.849	9.158	10.547	8.129	11.503	7.005	6.531	1.942	9.953	5.846	6.418	0.678	4.485	5.024	4.184	2.601	1.253	4.264	3.655	2.259	2.227	3.24	1.648	2.312	1.33	9.386	0.674	1.836	1.656	0.62	0.357	4.443	2.847	0.786	2.773	0.887	5.652	2.606	1.091	0.881	2.397	0.834	3.211	0.313	3.062	3.16	0.933
PH2OH	15.896	8.108	4.027	7.053	7.769	6.204	10.06	4.595	5.094	1.487	8.293	4.343	5.369	0.245	3.224	4.413	3.252	1.665	0.993	3.731	3.101	2.292	2.555	1.422	1.922	2.636	1.814	6.519	1.054	2.182	2.093	1.273	0.951	3.068	1.499	0.85	2.173	2.931	3.779	2.032	0.342	1.952	2.185	0.949	3.318	1.657	1.982	1.052	1.104
ClCN	11.355	5.92	3.123	5.737	6.835	5.078	15.375	4.329	3.996	2.675	5.703	2.404	3.392	2.441	2.709	2.793	2.879	1.789	1.739	3.556	3.109	2.007	2.164	0.98	1.837	2.235	1.654	4.236	1.246	2.338	2.144	1.769	1.384	3.067	2.478	1.088	2.462	1.722	3.155	1.776	1.12	1.1	2.082	1.009	3.649	2.067	2.557	1.66	0.562
FCN	12.238	6.245	3.548	6.48	7.445	5.77	4.013	5.063	4.545	1.486	4.421	3.587	5.269	0.913	3.92	3.715	3.033	1.966	0.145	3.695	3.473	2.21	2.318	1.208	3.197	2.325	2.3	5.233	1.638	2.846	2.765	2.866	2.078	3.531	1.378	0.718	1.441	1.031	2.779	2.719	0.95	1.92	1.968	0.831	4.398	1.93	1.691	1.821	0.583
HBS	11.425	4.581	2.224	4.221	5.709	4.623	9.38	2.793	3.307	0.977	9.1	4.888	4.653	1.674	1.393	2.432	1.79	1.02	1.898	3.529	3.016	2.017	2.133	1.218	1.19	2.172	1.57	2.756	2.355	2.528	2.891	1.89	1.709	2.137	2.208	1.955	1.444	2.965	5.148	1.165	1.106	2.277	1.93	1.437	4.045	2.793	2.337	5.488	0.941
O2	12.131	5.256	2.577	5.734	6.546	3.887	3.527	3.959	2.768	1.047	3.18	1.797	3.95	1.858	2.573	2.184	1.1	0.907	1.506	2.548	1.956	0.934	1.587	3.326	3.079	1.527	1.805	9.566	1.436	2.312	1.409	2.369	2.385	2.42	0.667	1.246	1.344	1.443	2.095	1.539	0.901	1.432	1.11	1.941	3.799	0.883	3.715	3.573	2.244
CH3NH2	17.408	9.227	6.303	8.205	9.127	7.314	2.81	6.097	6.142	1.355	9.024	4.965	6.466	1.24	3.948	5.006	4.081	2.607	0.579	4.138	3.672	2.514	2.623	1.868	1.954	2.705	1.788	7.269	0.933	2.219	2.041	1.157	0.802	4.102	1.974	1.377	2.802	0.916	5.092	2.441	0.41	2.279	2.76	0.932	3.478	1.278	1.779	3.133	0.999
HOCl	14.652	7.371	2.776	7.107	8.499	5.918	16.019	5.12	4.256	2.762	8.259	2.555	3.391	1.945	3.007	3.389	3.228	1.341	1.325	4.021	3.29	1.824	2.184	1.806	2.442	2.234	1.836	6.574	1.068	2.595	2.418	1.764	1.371	3.377	3.745	0.571	3.152	1.327	3.875	1.76	0.605	0.35	2.155	0.489	4.174	1.871	2.76	1.795	0.817
HCONH2	18.122	8.72	5.714	8.634	9.826	7.069	11.584	6.092	5.656	1.68	6.467	3.82	5.161	2.25	3.529	4.474	2.782	2.089	3.068	2.987	2.53	1.343	1.325	4.904	1.072	1.401	1.036	11.798	1.759	1.006	1.195	1.331	1.9	3.293	1.401	1.845	1.836	2.503	3.371	1.535	2.238	1.056	1.359	2.235	2.088	1.65	4.947	4.306	0.495
N2	11.017	5.236	2.499	4.924	5.925	4.212	5.642	3.264	3.165	2.385	2.9	1.835	2.961	2.119	1.969	1.689	1.534	1.063	1.791	2.903	2.404	1.547	1.718	1.628	3.074	1.718	2.044	4.718	1.379	2.769	2.158	2.859	2.729	2.202	1.36	1.157	1.931	1.973	1.758	1.237	0.835	2.632	1.648	0.8	3.965	2.385	3.247	2.219	0.168
HO2	15.476	7.447	3.677	7.832	8.837	6.224	8.96	5.678	4.858	3.015	3.524	1.829	4.73	1.684	3.108	3.317	2.276	1.837	1.723	2.906	2.421	1.191	1.217	4.488	3.071	1.231	1.301	12.958	1.158	1.652	1.11	1.461	0.714	3.251	1.666	1.651	1.231	1.714	1.918	1.338	1.202	0.368	1.07	2.008	3.238	0.9	3.889	3.695	2.162
Cl2	12.587	6.203	1.43	5.672	7.17	4.686	27.077	3.72	3.034	2.508	8.45	1.257	1.868	2.486	1.924	2.149	2.33	0.622	2.025	3.707	2.899	1.431	1.931	1.2	1.638	2.009	1.429	4.776	1.158	2.489	2.211	1.467	1.489	2.458	3.769	1.3	2.59	1.856	3.624	1.059	0.994	0.387	1.946	0.467	3.935	2.32	3.145	2.578	0.774
NP	10.707	4.03	1.411	4.226	5.468	4.22	4.047	2.792	2.974	0.541	4.128	4.066	6.272	2.107	1.96	2.579	1.665	0.311	1	2.964	2.357	1.702	1.77	1.162	1.309	1.773	1.481	2.615	1.685	2.075	2.137	1.883	1.411	1.968	1.044	1.142	1.029	0.949	2.793	1.474	0.792	2.812	1.49	1.055	3.375	2.044	2.809	3.045	1.099
SiH4	17.019	10.285	4.642	7.148	6.581	5.513	6.581	2.855	4.99	0.283	2.92	3.029	3.705	0.283	2.441	4.293	3.138	2.092	1.961	3.399	3.051	2.506	3.29	0.109	2.92	3.334	2.767	5.818	0.915	2.484	2.55	1.525	1.7	1.852	0.458	1.307	1.613	12.922	0.937	1.569	1.591	3.029	2.811	1.242	3.639	2.876	1.852	0.85	0.458
CH3SH	15.095	7.541	3.883	6.433	7.686	5.933	1.597	4.5	4.71	0.612	9.782	4.054	4.49	0.172	2.523	3.73	3.139	1.173	1.307	4.107	3.459	2.273	2.576	0.699	1.166	2.672	1.535	4.34	1.452	2.408	2.206	1.105	0.993	3.201	2.79	2.106	3.428	2.122	5.023	1.592	1.035	1.888	2.705	1.209	3.773	2.048	1.656	1.181	1.012
NH2Cl	14.429	7.099	3.149	6.618	8.094	5.754	7.838	4.809	4.155	1.481	8.344	3.404	3.46	1.747	2.809	3.115	3.118	1.196	1.685	3.836	3.1	1.672	1.963	1.837	1.627	2.026	1.366	6.187	0.957	2.271	2.056	1.206	0.938	3.159	3.528	0.876	2.677	1.149	4.503	1.651	0.397	0.536	2.128	0.72	3.76	1.527	2.964	1.558	0.672
FNO	10.529	4.417	0.861	4.518	5.313	2.816	9.595	2.51	1.569	1.694	1.755	2.412	1.269	3.217	1.359	0.921	0.919	1.09	3.554	1.213	1.024	1.579	1.351	4.963	1.959	1.351	1.298	9.106	2.575	1.188	1.428	1.293	1.299	0.948	1.57	2.748	1.449	2.98	1.707	0.84	2.851	1.752	1.359	3.254	1.914	1.964	5.804	3.378	1.06
NH2F	16.402	8.397	4.594	8.385	9.41	6.933	12.371	6.374	5.436	2.491	7.131	4.327	5.362	1.261	4.221	4.278	3.326	2.146	1.154	3.613	3.138	1.753	1.872	3.122	2.92	1.91	1.726	9.13	0.179	2.103	1.711	1.592	0.889	3.955	2.567	0.416	2.068	0.823	3.976	2.357	0.716	0.567	1.756	0.582	3.638	0.594	3.007	2.756	0.564
BH2Cl	13.895	7.704	3.524	6.464	7.179	5.494	10.097	4.107	4.365	0.701	5.894	2.633	4.728	0.45	2.221	3.357	2.75	1.254	1.092	3.636	3.118	2.025	2.435	1.232	2.163	2.49	1.933	6.217	1.082	2.408	2.435	1.66	1.565	2.766	1.694	1.079	1.629	3.82	3.161	1.245	0.486	2.264	2.444	0.719	3.788	2.672	2.154	2.123	0.77
PH3O	14.726	8.245	4.288	6.919	7.402	5.691	7.595	4.145	4.712	0.634	3.329	2.346	4.563	0.668	2.957	4.067	2.507	1.58	1.164	2.826	2.283	1.449	1.718	3.118	1.78	1.795	1.237	9.789	1.164	1.422	1.359	0.892	1.035	2.333	0.395	1.233	0.062	2.674	1.756	1.506	1.367	1.636	1.542	1.01	2.384	1.061	3.459	19.888	0.892
OF2	12.793	6.94	2.372	7.213	7.94	5.216	5.791	5.284	3.946	1.982	1.934	1.917	2.571	1.486	4.093	2.703	2.848	2.836	1.277	2.761	2.188	0.942	1.196	3.55	4.071	1.19	1.596	9.307	1.188	2.315	1.234	2.444	2.081	3.056	1.339	1.454	1.569	1.122	2.236	2.701	0.966	0.851	1.265	1.813	3.674	0.238	3.728	2.928	1.008
SO-trip	15.244	6.631	4.731	6.736	7.81	4.167	10.659	4.407	2.453	2.637	5.361	4.139	5.213	1.66	2.793	4.439	2.335	1.035	0.84	3.595	2.815	1.235	2.154	1.373	1.673	2.211	1.567	5.414	0.669	1.979	1.864	1.451	0.638	2.823	3.53	1.115	2.898	0.654	2.419	1.687	0.924	1.988	1.837	0.154	4.593	1.394	2.76	1.19	1.055
NH2OH	17.171	8.487	5.135	8.331	9.549	7.116	18.552	6.347	5.518	2.251	7.921	5.083	5.607	0.998	4.049	4.324	3.553	1.91	1.124	3.601	2.985	1.596	1.64	3.619	2.264	1.676	1.308	9.787	0.5	1.811	1.535	1.059	0.582	3.885	2.683	0.78	1.776	1.089	4.611	2.239	1.071	0.594	1.773	0.926	3.357	0.179	3.387	3.39	0.721
SiH3Cl	14.514	8.614	3.537	6.655	6.819	5.252	5.447	3.57	4.344	0.8	4.662	1.92	2.53	0.528	2.209	3.369	2.816	1.239	1.91	3.405	2.917	2.046	2.664	0.864	2.169	2.736	2.012	6.14	0.807	2.17	2.131	1.231	1.199	2.339	1.604	1.008	1.839	7.118	1.782	1.248	0.934	1.847	2.513	0.796	3.406	2.441	2.226	0.175	0.6
SiH3F	16.724	10.333	4.72	8.156	7.7	6.277	12.266	4.449	5.558	1.103	3.149	3.204	4.216	0.565	3.942	4.891	3.791	2.993	0.62	3.666	3.387	2.625	3.283	1.104	4.086	3.317	3.109	7.614	0.795	2.755	2.704	2.203	1.984	2.918	0.872	0.602	1.558	6.782	1.169	2.618	1.123	2.96	2.818	1.106	4.005	2.577	1.859	1.94	0.745
S2H2	13.289	6.335	2.098	5.394	6.808	4.889	12.369	3.379	3.501	1.141	9.646	2.806	2.588	1.36	1.409	2.362	2.033	0.184	2.554	3.469	2.72	1.46	1.823	1.187	0.416	1.941	0.765	4.496	0.982	1.82	1.543	0.451	0.421	2.203	2.975	1.396	2.543	1.668	4.412	0.59	0.912	0.446	1.876	0.413	3.186	1.636	2.66	1.531	0.811
SO2	10.361	4.145	0.627	4.393	5.252	3.252	5.676	2.615	2.043	1.314	2.428	1.241	2.576	2.832	1.414	1.5	1.083	0.823	2.721	1.405	1.09	0.982	1.021	4.19	1.088	1.002	1.097	9.23	1.85	0.888	1.106	1.03	1.313	1.14	1.172	2.041	1.353	2.553	1.047	0.677	2.142	1.133	0.815	2.344	1.783	1.315	4.685	2.865	0.573
CO	12.344	5.858	2.575	5.207	5.923	4.311	4.052	2.912	3.095	1.082	1.526	1.232	2.657	1.207	1.865	1.547	1.728	0.857	2.05	2.272	1.689	1.01	1.186	2.826	2.753	1.186	1.584	7.617	0.89	1.911	1.678	1.867	1.643	1.521	0.691	0.872	1.238	0.58	0.846	1.088	1.589	1.537	0.752	1.419	2.979	1.398	3.152	2.185	0.614
PS	10.09	8.794	0.848	3.007	4.498	2.721	26.983	1.241	1.357	0.669	6.433	4.31	4.427	3.109	0.677	1.586	0.572	1.277	2.242	2.433	1.693	0.758	1.072	1.136	0.855	1.125	0.794	1.617	1.181	1.568	1.477	1.149	1.11	0.705	1.85	10.143	0.987	7.626	3.99	0.731	0.61	2.204	0.994	0.742	3.434	9.935	3.065	12.035	9.424
P2	10.311	3.333	0.276	3.158	4.79	3.548	15.633	1.597	2.172	2.019	8.437	5.534	5.527	3.218	0.505	1.577	0.785	1.434	1.861	3.167	2.407	1.471	1.722	0.558	0.455	1.788	0.972	0.874	2.057	2.372	2.162	1.571	1.721	1.21	2.194	2.017	1.609	1.035	4.724	0.322	1.804	3.275	1.6	0.901	4.066	2.796	2.744	7.551	0.224
P2H4	12.782	6.279	2.218	4.847	5.717	4.532	9.353	2.717	3.6	1.259	7.735	3.564	3.464	0.985	1.308	2.619	1.908	0.16	2.501	3.042	2.384	1.607	1.929	0.604	0.471	2.054	0.831	3.779	0.908	1.638	1.352	0.538	0.636	1.821	2.06	1.542	2.232	2.937	3.733	0.66	1.204	1.85	1.806	0.612	2.772	1.509	1.998	2.766	0.761
S2	11.045	3.937	1.271	3.643	5.074	2.836	19.229	1.749	1.357	1.768	6.785	3.356	3.279	3.23	0.395	1.547	0.6	1.178	2.492	2.487	1.717	0.368	1.062	1.475	0.207	1.133	0.413	4.46	0.795	1.548	1.332	0.659	1.326	0.913	2.898	1.138	1.864	0.223	4.376	0.44	1.02	1.472	0.885	0.594	3.484	1.309	3.395	3.305	1.474
SCl2	12.22	6.12	1.858	5.535	6.856	4.642	48.422	3.628	3.233	1.967	8.604	1.42	1.669	1.584	1.54	1.93	1.932	0.446	2.272	3.202	2.516	1.148	1.542	1.685	0.659	1.656	0.658	5.188	0.585	1.57	1.326	0.63	0.525	2.241	3.116	0.789	2.087	1.058	3.557	0.617	0.533	0.529	1.583	0.132	2.903	1.511	3.197	1.361	0.542
CS	10.847	4.054	0.827	3.553	4.875	3.344	2.204	1.774	2.11	1.461	4.388	1.186	3.279	2.805	0.973	1.083	0.755	1.343	2.314	2.415	1.754	0.815	1.097	1.357	0.874	1.101	0.912	2.986	0.892	1.793	1.607	1.358	1.428	0.975	0.426	0.91	1.112	1.017	1.706	1.077	0.631	1.891	0.955	0.745	3.137	2.075	3.089	3.975	0.241
HNC	13.278	5.744	3.086	5.158	6.253	4.631	5.712	3.036	3.41	2.097	3.62	0.995	3.595	2.365	1.631	1.758	1.515	0.183	2.255	2.369	1.698	0.795	0.956	2.701	1.736	0.924	1.148	6.823	0.694	1.662	1.561	1.417	1.355	1.557	0.48	0.707	0.83	0.947	0.837	0.728	1.552	1.731	0.687	0.949	2.881	1.387	3.839	1.428	0.291
NCO	8.516	2.993	0.828	2.743	3.768	2.175	2.844	1.369	1.272	1.283	0.994	2.09	3.389	3.474	1.291	0.917	0.54	0.559	2.578	1.151	0.802	0.603	0.537	2.626	0.822	0.525	0.535	4.721	1.214	0.897	0.89	0.847	0.716	0.474	0.814	1.195	0.676	0.932	1.375	0.64	1.114	1.048	0.444	0.865	2.226	0.637	4.325	1.852	0.251
[truncated: 17 more columns]

## Sheet: WFT Data&Extrapolation
From a5Z and a4Z
CBS	HF-XX	HF-YY	HF-ZZ	MP2-XX	MP2-YY	MP2-ZZ	CCSD-XX	CCSD-YY	CCSD-ZZ	CCSD(T)-XX	CCSD(T)-YY	CCSD(T)-ZZ		a5Z	HF-XX	HF-YY	HF-ZZ			a5Z	Spin Polarization	HF-XX	HF-YY	HF-ZZ	MP2-XX	MP2-YY	MP2-ZZ	CCSD-XX	CCSD-YY	CCSD-ZZ	CCSD(T)-XX	CCSD(T)-YY	CCSD(T)-ZZ		aQZ	Spin Polarization	HF-XX	HF-YY	HF-ZZ	MP2-XX	MP2-YY	MP2-ZZ	CCSD-XX	CCSD-YY	CCSD-ZZ	CCSD(T)-XX	CCSD(T)-YY	CCSD(T)-ZZ
AlF	6.511	6.511	5.101	6.05	6.05	5.237	5.993	5.993	5.056	5.971	5.971	5.132		AlF	6.511	6.511	5.101			AlF	NSP	6.511	6.511	5.101	6.06	6.06	5.249	6.001	6.001	5.068	5.983	5.983	5.144		AlF	NSP	6.508	6.508	5.1	6.067	6.067	5.259	6.006	6.006	5.078	5.991	5.991	5.154
Ar	1.589	1.589	1.589	1.638	1.638	1.638	1.619	1.619	1.619	1.634	1.634	1.634		Ar	1.589	1.589	1.589			Ar	NSP	1.589	1.589	1.589	1.639	1.639	1.639	1.62	1.62	1.62	1.635	1.635	1.635		Ar	NSP	1.593	1.593	1.593	1.644	1.644	1.644	1.625	1.625	1.625	1.64	1.64	1.64
Be	6.658	6.658	6.658	7.167	7.167	7.167	5.654	5.654	5.654	5.622	5.622	5.622		Be	6.658	6.658	6.658			Be	SP	6.658	6.658	6.658	7.146	7.146	7.146	5.661	5.661	5.661	5.63	5.63	5.63		Be	SP	6.644	6.644	6.644	7.112	7.112	7.112	5.654	5.654	5.654	5.624	5.624	5.624
BeH	5.434	5.434	3.727	5.433	5.433	3.769	5.397	5.397	3.815	5.395	5.395	3.825		BeH	5.434	5.434	3.727			BeH	SP	5.434	5.434	3.727	5.432	5.432	3.772	5.397	5.397	3.818	5.395	5.395	3.828		BeH	SP	5.424	5.424	3.72	5.421	5.421	3.768	5.387	5.387	3.814	5.385	5.385	3.824
BF	3.07	3.07	2.478	3.072	3.072	2.713	2.939	2.939	2.624	2.95	2.95	2.686		BF	3.07	3.07	2.478			BF	NSP	3.07	3.07	2.478	3.072	3.072	2.717	2.94	2.94	2.629	2.952	2.952	2.691		BF	NSP	3.068	3.068	2.478	3.07	3.07	2.721	2.939	2.939	2.634	2.952	2.952	2.696
BH2	2.774	2.908	2.836	2.838	2.991	2.891	2.823	2.998	2.897	2.832	3.019	2.914		BH2	2.774	2.908	2.836			BH2	SP	2.774	2.908	2.836	2.838	2.993	2.894	2.824	3	2.901	2.833	3.021	2.917		BH2	SP	2.773	2.909	2.834	2.837	2.996	2.895	2.824	3.003	2.903	2.833	3.024	2.918
BH3	2.676	2.676	2.046	2.722	2.722	2.088	2.717	2.717	2.089	2.73	2.73	2.099		BH3	2.676	2.676	2.046			BH3	NSP	2.676	2.676	2.046	2.723	2.723	2.089	2.718	2.718	2.09	2.731	2.731	2.1		BH3	NSP	2.677	2.677	2.046	2.725	2.725	2.09	2.72	2.72	2.091	2.733	2.733	2.101
C2H	2.67	2.67	3.796	3.181	3.181	4.274	2.931	2.931	3.845	3.02	3.02	3.871		C2H	2.67	2.67	3.796			C2H	SP	2.67	2.67	3.796	3.179	3.179	4.273	2.935	2.935	3.848	3.024	3.024	3.875		C2H	SP	2.67	2.67	3.796	3.177	3.177	4.272	2.939	2.939	3.851	3.028	3.028	3.879
CH2-t	1.955	2.21	1.893	2.106	2.29	2.013	2.081	2.281	2	2.106	2.301	2.023		CH2-t	1.955	2.21	1.893			CH2-t	SP	1.955	2.21	1.893	2.106	2.291	2.012	2.082	2.282	2	2.107	2.302	2.022		CH2-t	SP	1.957	2.208	1.893	2.108	2.29	2.011	2.085	2.281	2	2.11	2.301	2.021
ClF	2.242	2.242	3.307	2.372	2.372	3.317	2.32	2.32	3.318	2.356	2.356	3.337		ClF	2.242	2.242	3.307			ClF	NSP	2.242	2.242	3.307	2.373	2.373	3.318	2.323	2.323	3.32	2.357	2.357	3.339		ClF	NSP	2.241	2.241	3.308	2.373	2.373	3.32	2.325	2.325	3.323	2.357	2.357	3.342
CO	1.671	1.671	2.145	1.765	1.765	2.302	1.73	1.73	2.264	1.753	1.753	2.283		CO	1.671	1.671	2.145			CO	NSP	1.671	1.671	2.145	1.766	1.766	2.304	1.731	1.731	2.267	1.754	1.754	2.285		CO	NSP	1.671	1.671	2.147	1.767	1.767	2.308	1.732	1.732	2.272	1.755	1.755	2.289
CS	3.548	3.548	5.494	3.483	3.483	5.557	3.493	3.493	5.599	3.507	3.507	5.608		CS	3.548	3.548	5.494			CS	NSP	3.548	3.548	5.494	3.487	3.487	5.566	3.496	3.496	5.609	3.511	3.511	5.618		CS	NSP	3.55	3.55	5.495	3.493	3.493	5.576	3.501	3.501	5.62	3.517	3.517	5.629
H	0.667	0.667	0.667	0.667	0.667	0.667	0.667	0.667	0.667	0.667	0.667	0.667		H	0.667	0.667	0.667			H	NSP	0.667	0.667	0.667	0.667	0.667	0.667	0.667	0.667	0.667	0.667	0.667	0.667		H	NSP	0.667	0.667	0.667	0.667	0.667	0.667	0.667	0.667	0.667	0.667	0.667	0.667
H2	0.683	0.683	0.958	0.679	0.679	0.95	0.678	0.678	0.948	0.678	0.678	0.948		H2	0.683	0.683	0.958			H2	NSP	0.683	0.683	0.958	0.679	0.679	0.952	0.678	0.678	0.949	0.678	0.678	0.949		H2	NSP	0.685	0.685	0.957	0.681	0.681	0.953	0.68	0.68	0.949	0.68	0.68	0.949
H2O	1.169	1.362	1.263	1.401	1.47	1.431	1.32	1.434	1.374	1.362	1.46	1.406		H2O	1.169	1.362	1.263			H2O	NSP	1.169	1.362	1.263	1.398	1.472	1.43	1.321	1.437	1.374	1.362	1.462	1.406		H2O	NSP	1.164	1.362	1.259	1.39	1.474	1.425	1.317	1.44	1.37	1.357	1.464	1.402
HBO	1.991	1.991	2.887	2.142	2.142	3.246	2.07	2.07	3.113	2.1	2.1	3.171		HBO	1.991	1.991	2.887			HBO	NSP	1.991	1.991	2.887	2.145	2.145	3.25	2.074	2.074	3.118	2.104	2.104	3.175		HBO	NSP	1.988	1.988	2.888	2.145	2.145	3.255	2.075	2.075	3.124	2.105	2.105	3.18
HCl	2.393	2.393	2.661	2.477	2.477	2.72	2.431	2.431	2.687	2.458	2.458	2.709		HCl	2.393	2.393	2.661			HCl	NSP	2.393	2.393	2.661	2.481	2.481	2.722	2.435	2.435	2.69	2.462	2.462	2.712		HCl	NSP	2.398	2.398	2.659	2.49	2.49	2.722	2.444	2.444	2.691	2.471	2.471	2.713
HCN	2.066	2.066	3.343	2.057	2.057	3.236	2.039	2.039	3.261	2.061	2.061	3.295		HCN	2.066	2.066	3.343			HCN	NSP	2.066	2.066	3.343	2.059	2.059	3.24	2.04	2.04	3.265	2.063	2.063	3.299		HCN	NSP	2.067	2.067	3.342	2.062	2.062	3.243	2.042	2.042	3.268	2.066	2.066	3.302
He	0.196	0.196	0.196	0.202	0.202	0.202	0.205	0.205	0.205	0.205	0.205	0.205		He	0.196	0.196	0.196			He	NSP	0.196	0.196	0.196	0.202	0.202	0.202	0.205	0.205	0.205	0.205	0.205	0.205		He	NSP	0.196	0.196	0.196	0.202	0.202	0.202	0.205	0.205	0.205	0.205	0.205	0.205
HF	0.661	0.661	0.852	0.778	0.778	0.938	0.74	0.74	0.915	0.762	0.762	0.932		HF	0.661	0.661	0.852			HF	NSP	0.661	0.661	0.852	0.774	0.774	0.939	0.739	0.739	0.917	0.759	0.759	0.934		HF	NSP	0.656	0.656	0.851	0.765	0.765	0.939	0.733	0.733	0.918	0.751	0.751	0.935
HNC	2.229	2.229	3.309	2.322	2.322	3.461	2.28	2.28	3.443	2.312	2.312	3.475		HNC	2.229	2.229	3.309			HNC	NSP	2.229	2.229	3.309	2.324	2.324	3.465	2.283	2.283	3.448	2.314	2.314	3.48		HNC	NSP	2.228	2.228	3.309	2.325	2.325	3.469	2.285	2.285	3.453	2.315	2.315	3.485
Li	25.208	25.208	25.208	24.413	24.413	24.413	24.327	24.327	24.327	24.304	24.304	24.304		Li	25.208	25.208	25.208			Li	SP	25.208	25.208	25.208	24.474	24.474	24.474	24.382	24.382	24.382	24.362	24.362	24.362		Li	SP	25.365	25.365	25.365	24.689	24.689	24.689	24.591	24.591	24.591	24.574	24.574	24.574
N	1.063	1.063	1.063	1.06	1.06	1.06	1.067	1.067	1.067	1.077	1.077	1.077		N	1.063	1.063	1.063			N	SP	1.063	1.063	1.063	1.06	1.06	1.06	1.067	1.067	1.067	1.076	1.076	1.076		N	SP	1.064	1.064	1.064	1.061	1.061	1.061	1.068	1.068	1.068	1.076	1.076	1.076
N2	1.458	1.458	2.228	1.493	1.493	2.109	1.487	1.487	2.164	1.506	1.506	2.184		N2	1.458	1.458	2.228			N2	NSP	1.458	1.458	2.228	1.495	1.495	2.112	1.489	1.489	2.167	1.508	1.508	2.187		N2	NSP	1.458	1.458	2.228	1.497	1.497	2.115	1.491	1.491	2.17	1.51	1.51	2.19
Ne	0.35	0.35	0.35	0.4	0.4	0.4	0.386	0.386	0.386	0.393	0.393	0.393		Ne	0.35	0.35	0.35			Ne	NSP	0.35	0.35	0.35	0.396	0.396	0.396	0.384	0.384	0.384	0.391	0.391	0.391		Ne	NSP	0.345	0.345	0.345	0.387	0.387	0.387	0.377	0.377	0.377	0.384	0.384	0.384
NH	1.257	1.257	1.604	1.326	1.326	1.676	1.312	1.312	1.674	1.329	1.329	1.697		NH	1.257	1.257	1.604			NH	SP	1.257	1.257	1.604	1.326	1.326	1.677	1.313	1.313	1.676	1.329	1.329	1.699		NH	SP	1.255	1.255	1.603	1.324	1.324	1.677	1.312	1.312	1.677	1.327	1.327	1.7
NH2	1.452	1.774	1.749	1.584	1.855	1.916	1.55	1.839	1.878	1.574	1.861	1.918		NH2	1.452	1.774	1.749			NH2	SP	1.452	1.774	1.749	1.582	1.857	1.918	1.549	1.84	1.881	1.572	1.863	1.921		NH2	SP	1.449	1.775	1.745	1.577	1.86	1.916	1.545	1.842	1.88	1.567	1.866	1.92
NO	1.362	1.362	2.269	1.468	1.468	0.516	1.458	1.458	2.202	1.488	1.488	2.193		NO	1.362	1.362	2.269			NO	SP	1.362	1.362	2.269	1.468	1.468	0.526	1.46	1.46	2.205	1.489	1.489	2.194		NO	SP	1.36	1.36	2.267	1.466	1.466	0.534	1.46	1.46	2.206	1.488	1.488	2.193
O2	1.157	1.157	2.685	1.168	1.168	1.798	1.193	1.193	2.283	1.21	1.21	2.263		O2	1.157	1.157	2.685			O2	SP	1.157	1.157	2.685	1.171	1.171	1.8	1.195	1.195	2.284	1.211	1.211	2.264		O2	SP	1.155	1.155	2.684	1.172	1.172	1.801	1.195	1.195	2.284	1.21	1.21	2.264
OCl	2.388	2.388	3.726	2.432	2.432	4.314	2.399	2.399	4.111	2.421	2.421	4.171		OCl	2.388	2.388	3.726			OCl	SP	2.388	2.388	3.726	2.433	2.433	4.318	2.399	2.399	4.115	2.419	2.419	4.175		OCl	SP	2.387	2.387	3.726	2.433	2.433	4.322	2.398	2.398	4.119	2.416	2.416	4.179
OF	0.983	0.983	1.951	1.097	1.097	1.834	1.072	1.072	2.005	1.094	1.094	2.033		OF	0.983	0.983	1.951			OF	SP	0.983	0.983	1.951	1.094	1.094	1.834	1.07	1.07	2.006	1.091	1.091	2.033		OF	SP	0.982	0.982	1.948	1.09	1.09	1.831	1.067	1.067	2.004	1.087	1.087	2.03
OH	0.966	0.966	1.164	1.111	1.111	1.249	1.08	1.08	1.237	1.11	1.11	1.258		OH	0.966	0.966	1.164			OH	SP	0.966	0.966	1.164	1.109	1.109	1.25	1.08	1.08	1.238	1.109	1.109	1.259		OH	SP	0.962	0.962	1.163	1.103	1.103	1.25	1.076	1.076	1.238	1.104	1.104	1.259
P	3.783	3.783	3.783	3.684	3.684	3.684	3.693	3.693	3.693	3.705	3.705	3.705		P	3.783	3.783	3.783			P	SP	3.783	3.783	3.783	3.689	3.689	3.689	3.697	3.697	3.697	3.709	3.709	3.709		P	SP	3.784	3.784	3.784	3.695	3.695	3.695	3.702	3.702	3.702	3.714	3.714	3.714
PH	3.916	3.916	4.327	3.928	3.928	4.386	3.888	3.888	4.339	3.906	3.906	4.364		PH	3.916	3.916	4.327			PH	SP	3.916	3.916	4.327	3.932	3.932	4.392	3.892	3.892	4.344	3.91	3.91	4.369		PH	SP	3.917	3.917	4.327	3.937	3.937	4.398	3.897	3.897	4.349	3.915	3.915	4.374
PH2	4.067	4.385	4.429	4.107	4.438	4.527	4.059	4.389	4.461	4.081	4.411	4.496		PH2	4.067	4.385	4.429			PH2	SP	4.067	4.385	4.429	4.112	4.442	4.534	4.063	4.392	4.467	4.085	4.414	4.502		PH2	SP	4.068	4.385	4.429	4.118	4.446	4.541	4.068	4.395	4.473	4.09	4.417	4.508
SF	3.062	3.062	3.364	3.2	3.2	3.603	3.14	3.14	3.539	3.19	3.19	3.604		SF	3.062	3.062	3.364			SF	SP	3.062	3.062	3.364	3.209	3.209	3.607	3.149	3.149	3.544	3.199	3.199	3.608		SF	SP	3.061	3.061	3.368	3.217	3.217	3.615	3.157	3.157	3.553	3.207	3.207	3.616
SH	3.377	3.377	3.41	3.455	3.455	3.466	3.4	3.4	3.425	3.438	3.438	3.449		SH	3.377	3.377	3.41			SH	SP	3.377	3.377	3.41	3.467	3.467	3.471	3.41	3.41	3.43	3.448	3.448	3.455		SH	SP	3.383	3.383	3.409	3.484	3.484	3.475	3.426	3.426	3.434	3.464	3.464	3.46
SH2	3.568	3.545	3.499	3.682	3.595	3.588	3.595	3.546	3.527	3.634	3.57	3.558		SH2	3.568	3.545	3.499			SH2	NSP	3.568	3.545	3.499	3.692	3.6	3.593	3.604	3.551	3.532	3.646	3.575	3.563		SH2	NSP	3.574	3.544	3.498	3.708	3.604	3.597	3.619	3.555	3.536	3.663	3.579	3.567
From a4Z and a3Z
CBS	HF-XX	HF-YY	HF-ZZ	MP2-XX	MP2-YY	MP2-ZZ	CCSD-XX	CCSD-YY	CCSD-ZZ	CCSD(T)-XX	CCSD(T)-YY	CCSD(T)-ZZ		a5Z	HF-XX	HF-YY	HF-ZZ			aQZ	Spin Polarization	HF-XX	HF-YY	HF-ZZ	MP2-XX	MP2-YY	MP2-ZZ	CCSD-XX	CCSD-YY	CCSD-ZZ	CCSD(T)-XX	CCSD(T)-YY	CCSD(T)-ZZ		aTZ	Spin Polarization	HF-XX	HF-YY	HF-ZZ	MP2-XX	MP2-YY	MP2-ZZ	CCSD-XX	CCSD-YY	CCSD-ZZ	CCSD(T)-XX	CCSD(T)-YY	CCSD(T)-ZZ
AlF	6.511	6.511	5.101	6.047	6.047	5.237	5.99	5.99	5.057	5.972	5.972	5.132		AlF	6.511	6.511	5.101			AlF	NSP	6.508	6.508	5.1	6.067	6.067	5.259	6.006	6.006	5.078	5.991	5.991	5.154		AlF	NSP	6.479	6.479	5.08	6.07	6.07	5.271	6.003	6.003	5.088	5.992	5.992	5.166
Ar	1.589	1.589	1.589	1.641	1.641	1.641	1.614	1.614	1.614	1.632	1.632	1.632		Ar	1.589	1.589	1.589			Ar	NSP	1.593	1.593	1.593	1.644	1.644	1.644	1.625	1.625	1.625	1.64	1.64	1.64		Ar	NSP	1.556	1.556	1.556	1.605	1.605	1.605	1.598	1.598	1.598	1.609	1.609	1.609
BeH2	2.791	2.791	2.883	2.851	2.851	2.931	2.903	2.903	2.965	2.913	2.913	2.974		BeH2	2.791	2.791	2.883			BeH2	NSP	2.79	2.79	2.882	2.851	2.851	2.934	2.906	2.906	2.969	2.915	2.915	2.977		BeH2	NSP	2.788	2.788	2.894	2.851	2.851	2.952	2.909	2.909	2.988	2.917	2.917	2.995
BF	3.07	3.07	2.478	3.07	3.07	2.713	2.939	2.939	2.624	2.952	2.952	2.687		BF	3.07	3.07	2.478			BF	NSP	3.068	3.068	2.478	3.07	3.07	2.721	2.939	2.939	2.634	2.952	2.952	2.696		BF	NSP	3.058	3.058	2.481	3.063	3.063	2.735	2.932	2.932	2.651	2.945	2.945	2.712
BH2Cl	3.468	3.951	5.119	3.562	4.056	5.48	3.517	4.008	5.385	3.548	4.044	5.488		BH2Cl	3.468	3.951	5.119			BH2Cl	NSP	3.468	3.952	5.119	3.567	4.064	5.49	3.53	4.024	5.408	3.56	4.059	5.511		BH2Cl	NSP	3.45	3.933	5.114	3.556	4.054	5.499	3.53	4.025	5.435	3.558	4.059	5.537
BH2F	1.977	2.536	2.381	2.085	2.651	2.626	2.061	2.62	2.567	2.083	2.648	2.62		BH2F	1.977	2.536	2.381			BH2F	NSP	1.975	2.535	2.382	2.083	2.653	2.631	2.061	2.624	2.575	2.083	2.651	2.628		BH2F	NSP	1.966	2.527	2.383	2.074	2.649	2.638	2.055	2.623	2.586	2.077	2.649	2.639
BH3	2.676	2.676	2.046	2.721	2.721	2.09	2.715	2.715	2.09	2.728	2.728	2.1		BH3	2.676	2.676	2.046			BH3	NSP	2.677	2.677	2.046	2.725	2.725	2.09	2.72	2.72	2.091	2.733	2.733	2.101		BH3	NSP	2.677	2.677	2.048	2.729	2.729	2.092	2.726	2.726	2.094	2.739	2.739	2.104
BHF2	1.886	2.287	2.273	2.063	2.614	2.528	2.012	2.537	2.452	2.048	2.603	2.504		BHF2	1.886	2.287	2.273			BHF2	NSP	1.884	2.287	2.273	2.06	2.617	2.53	2.014	2.545	2.46	2.048	2.611	2.511		BHF2	NSP	1.871	2.285	2.265	2.045	2.619	2.525	2.006	2.554	2.463	2.038	2.62	2.512
C2H2	2.879	2.879	4.669	2.778	2.778	4.488	2.732	2.732	4.467	2.758	2.758	4.501		C2H2	2.879	2.879	4.669			C2H2	NSP	2.877	2.877	4.67	2.785	2.785	4.496	2.741	2.741	4.474	2.767	2.767	4.509		C2H2	NSP	2.86	2.86	4.668	2.781	2.781	4.504	2.739	2.739	4.48	2.765	2.765	4.517
C2H4	3.422	3.678	5.481	3.331	3.743	5.101	3.232	3.668	5.084	3.25	3.701	5.069		C2H4	3.422	3.678	5.481			C2H4	NSP	3.421	3.673	5.482	3.342	3.745	5.107	3.242	3.674	5.087	3.261	3.706	5.074		C2H4	NSP	3.411	3.655	5.484	3.348	3.737	5.116	3.247	3.671	5.092	3.267	3.702	5.082
CH2BH	4.362	3.587	5.926	4.209	3.654	5.745	4.096	3.578	5.748	4.117	3.61	5.762		CH2BH	4.362	3.587	5.926			CH2BH	NSP	4.362	3.584	5.923	4.229	3.659	5.749	4.114	3.585	5.754	4.136	3.617	5.77		CH2BH	NSP	4.356	3.571	5.919	4.25	3.657	5.755	4.132	3.586	5.763	4.156	3.618	5.781
CH3BH2	3.603	4.583	4.16	3.706	4.873	4.26	3.668	4.791	4.219	3.698	4.867	4.251		CH3BH2	3.603	4.583	4.16			CH3BH2	NSP	3.603	4.584	4.16	3.71	4.881	4.265	3.673	4.802	4.226	3.703	4.877	4.258		CH3BH2	NSP	3.603	4.585	4.16	3.716	4.891	4.272	3.68	4.817	4.236	3.71	4.891	4.267
CH3Cl	3.833	3.833	5.318	3.962	3.962	5.432	3.886	3.886	5.348	3.93	3.93	5.39		CH3Cl	3.833	3.833	5.318			CH3Cl	NSP	3.834	3.834	5.316	3.964	3.964	5.436	3.9	3.9	5.359	3.941	3.941	5.4		CH3Cl	NSP	3.799	3.799	5.299	3.931	3.931	5.427	3.883	3.883	5.36	3.92	3.92	5.399
CH3F	2.271	2.271	2.403	2.389	2.389	2.581	2.343	2.343	2.522	2.371	2.371	2.562		CH3F	2.271	2.271	2.403			CH3F	NSP	2.27	2.27	2.405	2.389	2.389	2.586	2.346	2.346	2.531	2.374	2.374	2.569		CH3F	NSP	2.261	2.261	2.403	2.382	2.382	2.588	2.343	2.343	2.538	2.37	2.37	2.574
CH3NH2	3.91	3.381	3.396	4.164	3.649	3.535	4.044	3.547	3.473	4.108	3.609	3.511		CH3NH2	3.91	3.381	3.396			CH3NH2	NSP	3.91	3.38	3.396	4.168	3.652	3.539	4.052	3.555	3.479	4.115	3.616	3.517		CH3NH2	NSP	3.908	3.377	3.395	4.171	3.655	3.543	4.061	3.565	3.486	4.122	3.624	3.524
CH3OH	2.874	3.206	2.745	3.019	3.438	2.948	2.96	3.343	2.871	2.998	3.398	2.917		CH3OH	2.874	3.206	2.745			CH3OH	NSP	2.874	3.207	2.744	3.023	3.443	2.948	2.967	3.352	2.875	3.004	3.406	2.92		CH3OH	NSP	2.871	3.204	2.737	3.025	3.445	2.943	2.973	3.36	2.875	3.009	3.413	2.919
CH3SH	6.196	4.892	4.875	6.361	5.027	5.035	6.23	4.936	4.923	6.285	4.984	4.981		CH3SH	6.196	4.892	4.875			CH3SH	NSP	6.194	4.891	4.876	6.365	5.032	5.045	6.24	4.947	4.944	6.295	4.994	5		CH3SH	NSP	6.176	4.868	4.848	6.355	5.017	5.029	6.239	4.941	4.943	6.293	4.986	4.997
CH4	2.372	2.372	2.372	2.445	2.445	2.445	2.406	2.406	2.406	2.426	2.426	2.426		CH4	2.372	2.372	2.372			CH4	NSP	2.372	2.372	2.372	2.447	2.447	2.447	2.41	2.41	2.41	2.43	2.43	2.43		CH4	NSP	2.372	2.372	2.372	2.45	2.45	2.45	2.415	2.415	2.415	2.435	2.435	2.435
Cl2	3.546	3.546	6.244	3.705	3.705	6.187	3.617	3.617	6.159	3.666	3.666	6.174		Cl2	3.546	3.546	6.244			Cl2	NSP	3.554	3.554	6.244	3.709	3.709	6.18	3.639	3.639	6.162	3.683	3.683	6.173		Cl2	NSP	3.509	3.509	6.197	3.659	3.659	6.124	3.613	3.613	6.119	3.65	3.65	6.125
ClCN	3.332	3.332	6.477	3.39	3.39	6.582	3.346	3.346	6.533	3.385	3.385	6.644		ClCN	3.332	3.332	6.477			ClCN	NSP	3.334	3.334	6.475	3.396	3.396	6.586	3.359	3.359	6.546	3.396	3.396	6.656		ClCN	NSP	3.313	3.313	6.466	3.381	3.381	6.585	3.353	3.353	6.557	3.388	3.388	6.666
ClF	2.242	2.242	3.307	2.38	2.38	3.325	2.321	2.321	3.321	2.356	2.356	3.343		ClF	2.242	2.242	3.307			ClF	NSP	2.241	2.241	3.308	2.373	2.373	3.32	2.325	2.325	3.323	2.357	2.357	3.342		ClF	NSP	2.204	2.204	3.285	2.328	2.328	3.289	2.295	2.295	3.301	2.323	2.323	3.316
CO	1.671	1.671	2.145	1.765	1.765	2.302	1.728	1.728	2.264	1.751	1.751	2.281		CO	1.671	1.671	2.145			CO	NSP	1.671	1.671	2.147	1.767	1.767	2.308	1.732	1.732	2.272	1.755	1.755	2.289		CO	NSP	1.665	1.665	2.148	1.764	1.764	2.314	1.731	1.731	2.281	1.754	1.754	2.298
CO2	1.776	1.776	3.518	1.917	1.917	4.069	1.861	1.861	3.899	1.891	1.891	3.954		CO2	1.776	1.776	3.518			CO2	NSP	1.774	1.774	3.518	1.915	1.915	4.071	1.863	1.863	3.908	1.892	1.892	3.961		CO2	NSP	1.754	1.754	3.518	1.895	1.895	4.074	1.848	1.848	3.92	1.876	1.876	3.97
CS	3.548	3.548	5.494	3.479	3.479	5.564	3.487	3.487	5.605	3.503	3.503	5.615		CS	3.548	3.548	5.494			CS	NSP	3.55	3.55	5.495	3.493	3.493	5.576	3.501	3.501	5.62	3.517	3.517	5.629		CS	NSP	3.536	3.536	5.49	3.496	3.496	5.586	3.504	3.504	5.634	3.52	3.52	5.642
CSO	3.765	3.765	7.277	3.808	3.808	7.949	3.759	3.759	7.735	3.781	3.781	7.778		CSO	3.765	3.765	7.277			CSO	NSP	3.768	3.768	7.278	3.818	3.818	7.959	3.775	3.775	7.752	3.796	3.796	7.793		CSO	NSP	3.744	3.744	7.272	3.804	3.804	7.965	3.769	3.769	7.768	3.789	3.789	7.806
FCN	2.127	2.127	3.554	2.158	2.158	3.679	2.133	2.133	3.66	2.162	2.162	3.723		FCN	2.127	2.127	3.554			FCN	NSP	2.126	2.126	3.554	2.161	2.161	3.683	2.137	2.137	3.668	2.166	2.166	3.73		FCN	NSP	2.11	2.11	3.553	2.15	2.15	3.687	2.128	2.128	3.678	2.157	2.157	3.739
FNO	3.244	2.296	1.598	3.355	2.428	1.761	3.413	2.426	1.708	3.445	2.465	1.747		FNO	3.244	2.296	1.598			FNO	NSP	3.242	2.294	1.595	3.352	2.424	1.752	3.417	2.429	1.705	3.447	2.466	1.742		FNO	NSP	3.229	2.281	1.574	3.337	2.408	1.723	3.412	2.423	1.684	3.439	2.457	1.718
H	0.667	0.667	0.667	0.667	0.667	0.667	0.667	0.667	0.667	0.667	0.667	0.667		H	0.667	0.667	0.667			H	NSP	0.667	0.667	0.667	0.667	0.667	0.667	0.667	0.667	0.667	0.667	0.667	0.667		H	NSP	0.664	0.664	0.664	0.664	0.664	0.664	0.664	0.664	0.664	0.664	0.664	0.664
H2	0.683	0.683	0.958	0.678	0.678	0.953	0.677	0.677	0.949	0.677	0.677	0.949		H2	0.683	0.683	0.958			H2	NSP	0.685	0.685	0.957	0.681	0.681	0.953	0.68	0.68	0.949	0.68	0.68	0.949		H2	NSP	0.687	0.687	0.957	0.684	0.684	0.954	0.683	0.683	0.95	0.683	0.683	0.95
H2O	1.169	1.362	1.263	1.4	1.472	1.432	1.32	1.436	1.372	1.363	1.46	1.405		H2O	1.169	1.362	1.263			H2O	NSP	1.164	1.362	1.259	1.39	1.474	1.425	1.317	1.44	1.37	1.357	1.464	1.402		H2O	NSP	1.146	1.359	1.244	1.365	1.474	1.406	1.302	1.443	1.358	1.338	1.467	1.388
HBO	1.991	1.991	2.887	2.144	2.144	3.25	2.071	2.071	3.114	2.101	2.101	3.17		HBO	1.991	1.991	2.887			HBO	NSP	1.988	1.988	2.888	2.145	2.145	3.255	2.075	2.075	3.124	2.105	2.105	3.18		HBO	NSP	1.979	1.979	2.885	2.141	2.141	3.258	2.075	2.075	3.134	2.105	2.105	3.189
HBS	4.313	4.313	6.522	4.242	4.242	6.715	4.205	4.205	6.651	4.211	4.211	6.678		HBS	4.313	4.313	6.522			HBS	NSP	4.314	4.314	6.52	4.258	4.258	6.728	4.224	4.224	6.666	4.23	4.23	6.693		HBS	NSP	4.298	4.298	6.514	4.263	4.263	6.742	4.233	4.233	6.683	4.239	4.239	6.71
HCCCl	4.005	4.005	8.165	4.008	4.008	8.182	3.937	3.937	8.048	3.98	3.98	8.157		HCCCl	4.005	4.005	8.165			HCCCl	NSP	4.005	4.005	8.164	4.014	4.014	8.191	3.951	3.951	8.065	3.992	3.992	8.175		HCCCl	NSP	3.977	3.977	8.155	3.994	3.994	8.196	3.942	3.942	8.081	3.98	3.98	8.192
HCCF	2.805	2.805	4.699	2.766	2.766	4.78	2.715	2.715	4.71	2.748	2.748	4.774		HCCF	2.805	2.805	4.699			HCCF	NSP	2.804	2.804	4.7	2.772	2.772	4.787	2.723	2.723	4.72	2.756	2.756	4.784		HCCF	NSP	2.787	2.787	4.698	2.765	2.765	4.793	2.719	2.719	4.73	2.751	2.751	4.794
HCHO	1.864	2.465	3.18	1.931	2.678	3.292	1.892	2.581	3.257	1.912	2.633	3.288		HCHO	1.864	2.465	3.18			HCHO	NSP	1.862	2.464	3.18	1.93	2.68	3.295	1.893	2.588	3.263	1.913	2.639	3.293		HCHO	NSP	1.848	2.452	3.179	1.917	2.672	3.298	1.883	2.587	3.27	1.903	2.636	3.299
HCl	2.393	2.393	2.661	2.486	2.486	2.72	2.428	2.428	2.684	2.457	2.457	2.707		HCl	2.393	2.393	2.661			HCl	NSP	2.398	2.398	2.659	2.49	2.49	2.722	2.444	2.444	2.691	2.471	2.471	2.713		HCl	NSP	2.353	2.353	2.633	2.444	2.444	2.701	2.414	2.414	2.678	2.438	2.438	2.698
HCN	2.066	2.066	3.343	2.055	2.055	3.24	2.034	2.034	3.263	2.059	2.059	3.296		HCN	2.066	2.066	3.343			HCN	NSP	2.067	2.067	3.342	2.062	2.062	3.243	2.042	2.042	3.268	2.066	2.066	3.302		HCN	NSP	2.058	2.058	3.342	2.061	2.061	3.249	2.042	2.042	3.276	2.065	2.065	3.311
HCONH2	4.604	3.685	2.76	5.218	4.129	3.011	5.064	3.973	2.91	5.189	4.087	2.967		HCONH2	4.604	3.685	2.76			HCONH2	NSP	4.602	3.683	2.756	5.221	4.131	3.008	5.077	3.984	2.914	5.2	4.096	2.97		HCONH2	NSP	4.598	3.668	2.741	5.224	4.121	2.995	5.094	3.987	2.91	5.214	4.096	2.964
HCOOH	3.587	3.192	2.236	4.036	3.556	2.428	3.922	3.426	2.354	4.005	3.52	2.401		HCOOH	3.587	3.192	2.236			HCOOH	NSP	3.586	3.191	2.232	4.039	3.56	2.425	3.933	3.438	2.356	4.014	3.531	2.401		HCOOH	NSP	3.58	3.18	2.213	4.038	3.556	2.407	3.943	3.445	2.345	4.022	3.536	2.388
He	0.196	0.196	0.196	0.202	0.202	0.202	0.205	0.205	0.205	0.205	0.205	0.205		He	0.196	0.196	0.196			He	NSP	0.196	0.196	0.196	0.202	0.202	0.202	0.205	0.205	0.205	0.205	0.205	0.205		He	NSP	0.195	0.195	0.195	0.201	0.201	0.201	0.204	0.204	0.204	0.204	0.204	0.204
HF	0.661	0.661	0.852	0.777	0.777	0.939	0.741	0.741	0.916	0.761	0.761	0.934		HF	0.661	0.661	0.852			HF	NSP	0.656	0.656	0.851	0.765	0.765	0.939	0.733	0.733	0.918	0.751	0.751	0.935		HF	NSP	0.633	0.633	0.847	0.732	0.732	0.936	0.706	0.706	0.918	0.721	0.721	0.934
HNC	2.229	2.229	3.309	2.322	2.322	3.463	2.279	2.279	3.443	2.31	2.31	3.476		HNC	2.229	2.229	3.309			HNC	NSP	2.228	2.228	3.309	2.325	2.325	3.469	2.285	2.285	3.453	2.315	2.315	3.485		HNC	NSP	2.215	2.215	3.309	2.318	2.318	3.477	2.281	2.281	3.467	2.31	2.31	3.498
HOCl	2.796	2.628	4.247	2.957	2.825	4.182	2.887	2.743	4.184	2.934	2.793	4.21		HOCl	2.796	2.628	4.247			HOCl	NSP	2.798	2.63	4.245	2.958	2.824	4.174	2.9	2.755	4.183	2.943	2.802	4.207		HOCl	NSP	2.762	2.592	4.218	2.921	2.782	4.139	2.879	2.731	4.157	2.917	2.773	4.178
HOOH	1.819	2.972	1.618	2.024	2.717	1.882	1.964	2.769	1.803	2.006	2.786	1.855		HOOH	1.819	2.972	1.618			HOOH	NSP	1.818	2.969	1.616	2.022	2.714	1.876	1.967	2.767	1.805	2.009	2.784	1.854		HOOH	NSP	1.808	2.954	1.601	2.011	2.699	1.855	1.963	2.754	1.795	2.004	2.77	1.84
LiBH4	4.119	4.119	4.398	4.292	4.292	4.639	4.254	4.254	4.604	4.298	4.298	4.665		LiBH4	4.119	4.119	4.398			LiBH4	NSP	4.119	4.119	4.398	4.296	4.296	4.643	4.261	4.261	4.61	4.305	4.305	4.67		LiBH4	NSP	4.12	4.12	4.4	4.303	4.303	4.65	4.271	4.271	4.62	4.315	4.315	4.679
LiCl	3.532	3.532	3.646	3.819	3.819	4.009	3.679	3.679	3.855	3.775	3.775	3.976		LiCl	3.532	3.532	3.646			LiCl	NSP	3.529	3.529	3.646	3.829	3.829	4.028	3.718	3.718	3.902	3.813	3.813	4.024		LiCl	NSP	3.488	3.488	3.644	3.806	3.806	4.052	3.735	3.735	3.964	3.828	3.828	4.088
LiCN	3.376	3.628	2.941	3.67	3.825	3.128	3.612	3.791	3.072	3.721	3.873	3.15		LiCN	3.376	3.628	2.941			LiCN	NSP	3.377	3.628	2.941	3.68	3.834	3.138	3.629	3.806	3.087	3.739	3.889	3.165		LiCN	NSP	3.376	3.628	2.934	3.692	3.847	3.145	3.65	3.827	3.1	3.761	3.911	3.178
LiH	3.745	3.745	3.24	4.006	4.006	3.463	4.373	4.373	3.795	4.374	4.374	3.81		LiH	3.745	3.745	3.24			LiH	NSP	3.745	3.745	3.24	4.016	4.016	3.485	4.392	4.392	3.826	4.395	4.395	3.841		LiH	NSP	3.746	3.746	3.238	4.031	4.031	3.513	4.419	4.419	3.866	4.425	4.425	3.882
Mg	12.094	12.094	12.094	10.654	10.654	10.654	10.692	10.692	10.692	10.591	10.591	10.591		Mg	12.094	12.094	12.094			Mg	NSP	12.092	12.092	12.092	10.717	10.717	10.717	10.743	10.743	10.743	10.652	10.652	10.652		Mg	NSP	12.083	12.083	12.083	10.797	10.797	10.797	10.806	10.806	10.806	10.729	10.729	10.729
Mg2	20.519	20.519	37.021	18.467	18.467	32.39	18.533	18.533	32.532	18.401	18.401	32.401		Mg2	20.519	20.519	37.021			Mg2	NSP	20.515	20.515	37.01	18.556	18.556	32.592	18.603	18.603	32.713	18.485	18.485	32.627		Mg2	NSP	20.503	20.503	36.97	18.671	18.671	32.844	18.692	18.692	32.936	18.594	18.594	32.912
N2	1.458	1.458	2.228	1.493	1.493	2.113	1.486	1.486	2.167	1.506	1.506	2.186		N2	1.458	1.458	2.228			N2	NSP	1.458	1.458	2.228	1.497	1.497	2.115	1.491	1.491	2.17	1.51	1.51	2.19		N2	NSP	1.452	1.452	2.228	1.496	1.496	2.118	1.492	1.492	2.174	1.51	1.51	2.195
N2H4	2.93	3.565	2.868	3.142	3.776	3.194	3.068	3.66	3.086	3.121	3.721	3.157		N2H4	2.93	3.565	2.868			N2H4	NSP	2.931	3.564	2.867	3.148	3.777	3.197	3.078	3.666	3.095	3.13	3.726	3.165		N2H4	NSP	2.929	3.556	2.864	3.153	3.772	3.2	3.089	3.668	3.106	3.139	3.726	3.175
NaCl	3.853	3.853	4.253	4.233	4.233	4.877	4.051	4.051	4.634	4.181	4.181	4.843		NaCl	3.853	3.853	4.253			NaCl	NSP	3.865	3.865	4.276	4.256	4.256	4.927	4.112	4.112	4.728	4.239	4.239	4.941		NaCl	NSP	3.797	3.797	4.25	4.203	4.203	4.938	4.111	4.111	4.799	4.234	4.234	5.018
NaCN	4.127	3.62	3.194	4.38	4.017	3.436	4.345	3.943	3.365	4.458	4.095	3.467		NaCN	4.127	3.62	3.194			NaCN	NSP	4.133	3.628	3.198	4.397	4.034	3.451	4.369	3.968	3.386	4.483	4.119	3.487		NaCN	NSP	4.122	3.61	3.181	4.401	4.028	3.449	4.383	3.973	3.392	4.498	4.123	3.492
NaH	4.719	4.719	5.688	5.166	5.166	6.79	5.765	5.765	7.915	5.81	5.81	8.169		NaH	4.719	4.719	5.688			NaH	NSP	4.721	4.721	5.695	5.181	5.181	6.815	5.809	5.809	7.977	5.85	5.85	8.211		NaH	NSP	4.717	4.717	5.712	5.195	5.195	6.857	5.862	5.862	8.069	5.898	5.898	8.276
Ne	0.35	0.35	0.35	0.398	0.398	0.398	0.385	0.385	0.385	0.394	0.394	0.394		Ne	0.35	0.35	0.35			Ne	NSP	0.345	0.345	0.345	0.387	0.387	0.387	0.377	0.377	0.377	0.384	0.384	0.384		Ne	NSP	0.326	0.326	0.326	0.36	0.36	0.36	0.354	0.354	0.354	0.358	0.358	0.358
NH2Cl	3.278	3.25	5.017	3.46	3.457	5.015	3.381	3.369	4.969	3.433	3.428	5.002		NH2Cl	3.278	3.25	5.017			NH2Cl	NSP	3.281	3.253	5.015	3.464	3.461	5.013	3.396	3.386	4.974	3.445	3.44	5.005		NH2Cl	NSP	3.243	3.214	4.989	3.427	3.423	4.987	3.375	3.366	4.957	3.42	3.414	4.986
NH2F	1.919	2.33	1.899	2.104	2.423	2.073	2.049	2.39	2.022	2.092	2.415	2.061		NH2F	1.919	2.33	1.899			NH2F	NSP	1.915	2.328	1.896	2.098	2.421	2.068	2.049	2.392	2.022	2.089	2.416	2.059		NH2F	NSP	1.898	2.316	1.88	2.078	2.409	2.049	2.037	2.385	2.01	2.074	2.408	2.045
NH2OH	2.403	3.178	2.265	2.676	3.255	2.507	2.591	3.193	2.428	2.652	3.235	2.479		NH2OH	2.403	3.178	2.265			NH2OH	NSP	2.402	3.176	2.264	2.678	3.255	2.505	2.599	3.197	2.432	2.658	3.238	2.482		NH2OH	NSP	2.395	3.168	2.253	2.675	3.25	2.492	2.604	3.197	2.428	2.661	3.237	2.476
NH3	1.896	1.896	1.973	2.021	2.021	2.29	1.97	1.97	2.178	2	2	2.242		NH3	1.896	1.896	1.973			NH3	NSP	1.896	1.896	1.968	2.022	2.022	2.284	1.974	1.974	2.18	2.003	2.003	2.241		NH3	NSP	1.892	1.892	1.953	2.019	2.019	2.268	1.975	1.975	2.174	2.003	2.003	2.232
NH3O	2.355	2.355	3.215	2.696	2.696	3.703	2.583	2.583	3.56	2.664	2.664	3.702		NH3O	2.355	2.355	3.215			NH3O	NSP	2.341	2.341	3.216	2.664	2.664	3.708	2.565	2.565	3.576	2.64	2.64	3.715		NH3O	NSP	2.291	2.291	3.21	2.589	2.589	3.708	2.509	2.509	3.59	2.576	2.576	3.726
OCl2	4.015	7.733	4.468	4.249	7.561	4.67	4.14	7.63	4.564	4.21	7.733	4.625		OCl2	4.015	7.733	4.468			OCl2	NSP	4.018	7.733	4.47	4.246	7.553	4.666	4.158	7.637	4.576	4.222	7.737	4.633		OCl2	NSP	3.968	7.703	4.426	4.188	7.512	4.614	4.128	7.616	4.546	4.184	7.712	4.597
P2H4	7.305	10.505	7.31	7.447	10.837	7.481	7.333	10.599	7.349	7.388	10.698	7.412		P2H4	7.305	10.505	7.31			P2H4	NSP	7.306	10.503	7.311	7.456	10.85	7.493	7.345	10.619	7.364	7.399	10.715	7.426		P2H4	NSP	7.298	10.498	7.301	7.459	10.866	7.498	7.352	10.644	7.373	7.405	10.736	7.434
PH2OH	4.735	4.661	4.718	4.917	5.015	4.899	4.818	4.866	4.8	4.872	4.949	4.854		PH2OH	4.735	4.661	4.718			PH2OH	NSP	4.735	4.66	4.718	4.923	5.021	4.905	4.828	4.877	4.81	4.881	4.96	4.863		PH2OH	NSP	4.724	4.658	4.707	4.92	5.028	4.902	4.831	4.892	4.813	4.883	4.974	4.864
PH3	4.377	4.377	4.533	4.434	4.434	4.673	4.38	4.38	4.572	4.405	4.405	4.616		PH3	4.377	4.377	4.533			PH3	NSP	4.377	4.377	4.535	4.438	4.438	4.682	4.385	4.385	4.584	4.409	4.409	4.627		PH3	NSP	4.375	4.375	4.523	4.441	4.441	4.68	4.39	4.39	4.586	4.413	4.413	4.627
PH3O	3.841	3.841	4.387	4.13	4.13	4.985	4.028	4.028	4.789	4.092	4.092	4.918		PH3O	3.841	3.841	4.387			PH3O	NSP	3.839	3.839	4.388	4.132	4.132	4.993	4.035	4.035	4.805	4.098	4.098	4.932		PH3O	NSP	3.832	3.832	4.397	4.13	4.13	5.011	4.041	4.041	4.834	4.102	4.102	4.959
S2H2	5.531	8.157	5.501	5.723	8.375	5.694	5.592	8.211	5.562	5.655	8.287	5.626		S2H2	5.531	8.157	5.501			S2H2	NSP	5.535	8.153	5.504	5.733	8.372	5.703	5.616	8.221	5.585	5.677	8.293	5.647		S2H2	NSP	5.5	8.12	5.469	5.706	8.341	5.676	5.608	8.207	5.578	5.666	8.274	5.637
SCl2	5.386	9.724	6.889	5.643	10.091	7.106	5.501	9.934	6.964	5.582	10.069	7.038		SCl2	5.386	9.724	6.889			SCl2	NSP	5.394	9.723	6.891	5.651	10.083	7.106	5.532	9.951	6.983	5.608	10.079	7.052		SCl2	NSP	5.346	9.681	6.839	5.603	10.031	7.051	5.516	9.934	6.954	5.584	10.052	7.017
SF2	3.009	3.55	3.228	3.211	3.832	3.48	3.116	3.747	3.384	3.173	3.815	3.445		SF2	3.009	3.55	3.228			SF2	NSP	3.005	3.551	3.227	3.206	3.829	3.476	3.123	3.753	3.39	3.176	3.818	3.448		SF2	NSP	2.96	3.529	3.199	3.159	3.801	3.444	3.093	3.738	3.371	3.141	3.799	3.425
SH2	3.568	3.545	3.499	3.693	3.602	3.595	3.592	3.548	3.528	3.638	3.573	3.561		SH2	3.568	3.545	3.499			SH2	NSP	3.574	3.544	3.498	3.708	3.604	3.597	3.619	3.555	3.536	3.663	3.579	3.567		SH2	NSP	3.538	3.516	3.467	3.685	3.58	3.57	3.612	3.538	3.517	3.653	3.56	3.546
SiH3Cl	5.453	5.453	6.749	5.657	5.657	7.147	5.602	5.602	7.062	5.658	5.658	7.164		SiH3Cl	5.453	5.453	6.749			SiH3Cl	NSP	5.454	5.454	6.748	5.662	5.662	7.153	5.618	5.618	7.085	5.672	5.672	7.184		SiH3Cl	NSP	5.438	5.438	6.754	5.652	5.652	7.169	5.623	5.623	7.124	5.674	5.674	7.219
SiH3F	4.012	4.012	3.594	4.215	4.215	3.873	4.187	4.187	3.82	4.231	4.231	3.879		SiH3F	4.012	4.012	3.594			SiH3F	NSP	4.011	4.011	3.594	4.215	4.215	3.877	4.191	4.191	3.828	4.233	4.233	3.886		SiH3F	NSP	4.008	4.008	3.603	4.213	4.213	3.891	4.195	4.195	3.848	4.234	4.234	3.905
SiH4	4.398	4.398	4.398	4.556	4.556	4.556	4.555	4.555	4.555	4.589	4.589	4.589		SiH4	4.398	4.398	4.398			SiH4	NSP	4.398	4.398	4.398	4.557	4.557	4.557	4.559	4.559	4.559	4.592	4.592	4.592		SiH4	NSP	4.407	4.407	4.407	4.568	4.568	4.568	4.573	4.573	4.573	4.605	4.605	4.605
SiO	3.999	3.999	4.497	4.103	4.103	5.272	3.966	3.966	4.877	4.02	4.02	5.075		SiO	3.999	3.999	4.497			SiO	NSP	3.996	3.996	4.498	4.11	4.11	5.285	3.975	3.975	4.899	4.029	4.029	5.095		SiO	NSP	3.981	3.981	4.497	4.109	4.109	5.301	3.976	3.976	4.927	4.031	4.031	5.12
SO2	2.767	4.652	3.086	2.924	5.069	3.46	2.847	4.953	3.298	2.892	5.017	3.382		SO2	2.767	4.652	3.086			SO2	NSP	2.762	4.651	3.084	2.917	5.072	3.461	2.846	4.967	3.307	2.889	5.028	3.389		SO2	NSP	2.728	4.647	3.067	2.88	5.074	3.448	2.818	4.983	3.305	2.858	5.04	3.384
Be	6.658	6.658	6.658	7.139	7.139	7.139	5.661	5.661	5.661	5.625	5.625	5.625		Be	6.658	6.658	6.658			Be	SP	6.644	6.644	6.644	7.112	7.112	7.112	5.654	5.654	5.654	5.624	5.624	5.624		Be	SP	6.624	6.624	6.624	7.074	7.074	7.074	5.643	5.643	5.643	5.622	5.622	5.622
BeH	5.434	5.434	3.727	5.428	5.428	3.766	5.393	5.393	3.809	5.391	5.391	3.819		BeH	5.434	5.434	3.727			BeH	SP	5.424	5.424	3.72	5.421	5.421	3.768	5.387	5.387	3.814	5.385	5.385	3.824		BeH	SP	5.405	5.405	3.708	5.406	5.406	3.769	5.374	5.374	3.819	5.372	5.372	3.829
BH2	2.774	2.908	2.836	2.839	2.989	2.892	2.826	2.995	2.899	2.835	3.016	2.914		BH2	2.774	2.908	2.836			BH2	SP	2.773	2.909	2.834	2.837	2.996	2.895	2.824	3.003	2.903	2.833	3.024	2.918		BH2	SP	2.773	2.91	2.834	2.836	3.005	2.902	2.823	3.014	2.911	2.832	3.035	2.926
BN	2.779	2.779	3.839	3.453	3.453	2.027	3.064	3.064	4.007	3.144	3.144	4.15		BN	2.779	2.779	3.839			BN	SP	2.779	2.779	3.837	3.452	3.452	2.086	3.08	3.08	4.038	3.159	3.159	4.18		BN	SP	2.774	2.774	3.829	3.446	3.446	2.161	3.097	3.097	4.075	3.175	3.175	4.216
BO	2.073	2.073	2.659	2.309	2.309	2.329	2.206	2.206	2.764	2.246	2.246	2.797		BO	2.073	2.073	2.659			BO	SP	2.071	2.071	2.659	2.309	2.309	2.35	2.211	2.211	2.778	2.251	2.251	2.809		BO	SP	2.061	2.061	2.656	2.302	2.302	2.376	2.211	2.211	2.794	2.25	2.25	2.823
BS	4.295	4.295	6.429	4.496	4.496	5.211	4.31	4.31	6.287	4.341	4.341	6.28		BS	4.295	4.295	6.429			BS	SP	4.297	4.297	6.427	4.502	4.502	5.255	4.329	4.329	6.308	4.359	4.359	6.298		BS	SP	4.283	4.283	6.422	4.494	4.494	5.313	4.338	4.338	6.334	4.367	4.367	6.321
C2H	2.67	2.67	3.796	3.184	3.184	4.273	2.93	2.93	3.846	3.021	3.021	3.872		C2H	2.67	2.67	3.796			C2H	SP	2.67	2.67	3.796	3.177	3.177	4.272	2.939	2.939	3.851	3.028	3.028	3.879		C2H	SP	2.662	2.662	3.794	3.16	3.16	4.268	2.944	2.944	3.856	3.03	3.03	3.887
C2H3	3.282	4.826	3.095	3.513	5.677	3.456	3.391	4.982	3.107	3.435	4.998	3.132		C2H3	3.282	4.826	3.095			C2H3	SP	3.279	4.826	3.096	3.507	5.67	3.455	3.395	4.983	3.114	3.437	5.002	3.14		C2H3	SP	3.265	4.828	3.089	3.489	5.663	3.445	3.39	4.987	3.115	3.43	5.009	3.142
CH2F	2.012	2.306	2.182	2.234	2.552	2.323	2.186	2.497	2.286	2.233	2.55	2.32		CH2F	2.012	2.306	2.182			CH2F	SP	2.009	2.306	2.18	2.229	2.551	2.322	2.186	2.501	2.288	2.231	2.552	2.321		CH2F	SP	1.993	2.299	2.167	2.21	2.542	2.31	2.174	2.499	2.281	2.216	2.548	2.312
CH2NH	3.079	2.518	4.493	3.312	2.733	-0.49	3.163	2.494	4.022	3.211	2.523	4.03		CH2NH	3.079	2.518	4.493			CH2NH	SP	3.077	2.518	4.49	3.31	2.731	-0.705	3.17	2.5	4.032	3.217	2.528	4.033		CH2NH	SP	3.07	2.508	4.479	3.303	2.718	-1.006	3.175	2.498	4.039	3.221	2.525	4.03
CH2PH	7.28	5.006	5.576	9.06	5.246	5.791	7.674	4.926	5.607	7.611	4.929	5.641		CH2PH	7.28	5.006	5.576			CH2PH	SP	7.28	5.006	5.575	9.055	5.25	5.79	7.675	4.936	5.615	7.615	4.941	5.649		CH2PH	SP	7.278	4.992	5.56	9.046	5.241	5.775	7.674	4.936	5.612	7.619	4.943	5.646
CH2-t	1.955	2.21	1.893	2.107	2.291	2.013	2.082	2.28	2.001	2.109	2.301	2.023		CH2-t	1.955	2.21	1.893			CH2-t	SP	1.957	2.208	1.893	2.108	2.29	2.011	2.085	2.281	2	2.11	2.301	2.021		CH2-t	SP	1.951	2.201	1.885	2.1	2.284	2	2.08	2.278	1.991	2.102	2.297	2.01
CH3O	3.677	2.625	3.013	4.093	2.769	3.324	4.072	2.728	3.316	4.181	2.77	3.399		CH3O	3.677	2.625	3.013			CH3O	SP	3.675	2.625	3.014	4.095	2.77	3.327	4.077	2.733	3.323	4.183	2.774	3.404		CH3O	SP	3.655	2.615	3.014	4.08	2.762	3.33	4.066	2.73	3.331	4.169	2.769	3.41
F2	0.831	0.831	1.706	0.937	0.937	2.5	0.922	0.922	1.882	0.946	0.946	1.839		F2	0.831	0.831	1.706			F2	SP	0.829	0.829	1.702	0.927	0.927	2.489	0.915	0.915	1.871	0.936	0.936	1.829		F2	SP	0.805	0.805	1.686	0.892	0.892	2.464	0.884	0.884	1.845	0.901	0.901	1.805
FH-OH	1.704	1.427	1.994	1.894	1.619	2.269	1.846	1.567	2.22	1.886	1.602	2.28		FH-OH	1.704	1.427	1.994			FH-OH	SP	1.697	1.42	1.993	1.881	1.602	2.272	1.84	1.556	2.228	1.877	1.588	2.287		FH-OH	SP	1.671	1.387	1.986	1.847	1.555	2.27	1.815	1.518	2.234	1.848	1.545	2.291
H2CN	2.222	2.65	3.543	2.299	2.773	3.84	2.234	2.735	3.618	2.262	2.773	3.657		H2CN	2.222	2.65	3.543			H2CN	SP	2.222	2.648	3.543	2.299	2.772	3.838	2.238	2.738	3.623	2.265	2.775	3.662		H2CN	SP	2.214	2.639	3.544	2.291	2.764	3.836	2.235	2.736	3.631	2.261	2.772	3.67
H2O-Li	41.7	37.1	32.9	39.527	34.427	41.9	38.827	33.754	42.227	38.527	33.527	43.727		H2O-Li	41.7	37.1	32.9			H2O-Li	SP	41.6	37.1	32.9	39.5	34.5	41.9	38.8	33.9	42.3	38.5	33.6	43.8		H2O-Li	SP	41.4	36.9	32.9	39.4	34.4	41.9	38.7	33.9	42.4	38.4	33.5	43.9
HCHS	3.882	4.478	6.569	4.227	4.726	8.288	3.879	4.524	6.696	3.891	4.571	6.673		HCHS	3.882	4.478	6.569			HCHS	SP	3.887	4.479	6.568	4.222	4.727	8.283	3.891	4.544	6.694	3.902	4.59	6.678		HCHS	SP	3.853	4.44	6.56	4.174	4.688	8.269	3.866	4.531	6.685	3.876	4.576	6.678
HCO	2.46	2.936	1.842	2.497	2.911	1.931	2.591	2.902	1.905	2.633	2.892	1.93		HCO	2.46	2.936	1.842			HCO	SP	2.458	2.936	1.84	2.504	2.915	1.93	2.598	2.909	1.907	2.638	2.899	1.931		HCO	SP	2.447	2.929	1.825	2.506	2.913	1.916	2.599	2.911	1.897	2.637	2.901	1.92
HCP	4.531	4.531	6.969	4.731	4.731	8.446	4.425	4.425	6.908	4.438	4.438	6.898		HCP	4.531	4.531	6.969			HCP	SP	4.53	4.53	6.971	4.72	4.72	8.441	4.431	4.431	6.915	4.445	4.445	6.91		HCP	SP	4.51	4.51	6.971	4.686	4.686	8.432	4.421	4.421	6.922	4.436	4.436	6.924
HNO	1.568	2.05	2.886	1.555	2.185	4.595	1.571	2.232	2.731	1.589	2.293	2.77		HNO	1.568	2.05	2.886			HNO	SP	1.564	2.046	2.887	1.542	2.178	4.597	1.566	2.235	2.731	1.584	2.294	2.772		HNO	SP	1.546	2.029	2.884	1.511	2.157	4.596	1.547	2.228	2.727	1.564	2.284	2.771
HNS	5.667	3.674	3.471	6.799	4.015	3.309	5.75	3.93	3.313	5.625	3.921	3.436		HNS	5.667	3.674	3.471			HNS	SP	5.666	3.676	3.472	6.81	4.011	3.321	5.757	3.944	3.321	5.631	3.946	3.426		HNS	SP	5.643	3.646	3.436	6.803	3.973	3.3	5.745	3.931	3.294	5.617	3.948	3.375
HO2	1.549	2.361	1.338	1.726	2.774	1.503	1.693	2.65	1.447	1.738	2.702	1.477		HO2	1.549	2.361	1.338			HO2	SP	1.547	2.358	1.336	1.719	2.772	1.494	1.691	2.651	1.441	1.732	2.701	1.469		HO2	SP	1.531	2.347	1.318	1.696	2.762	1.466	1.675	2.646	1.418	1.711	2.693	1.443
HOF	1.368	1.16	2.682	1.476	1.296	3.462	1.483	1.305	2.313	1.516	1.345	2.351		HOF	1.368	1.16	2.682			HOF	SP	1.365	1.158	2.678	1.468	1.286	3.019	1.481	1.303	2.293	1.512	1.339	2.328		HOF	SP	1.347	1.138	2.663	1.443	1.255	2.403	1.464	1.283	2.256	1.493	1.314	2.287
Li	25.208	25.208	25.208	24.449	24.449	24.449	24.336	24.336	24.336	24.314	24.314	24.314		Li	25.208	25.208	25.208			Li	SP	25.365	25.365	25.365	24.689	24.689	24.689	24.591	24.591	24.591	24.574	24.574	24.574		Li	SP	25.091	25.091	25.091	24.529	24.529	24.529	24.451	24.451	24.451	24.441	24.441	24.441
Li2	28.913	28.913	35.395	21.846	21.846	39.519	24.403	24.403	43.439	24.439	24.439	43.918		Li2	28.913	28.913	35.395			Li2	SP	28.89	28.89	35.384	22.219	22.219	39.58	24.554	24.554	43.626	24.587	24.587	44.055		Li2	SP	28.717	28.717	35.424	22.589	22.589	39.719	24.619	24.619	43.937	24.649	24.649	44.298
N	1.063	1.063	1.063	1.061	1.061	1.061	1.068	1.068	1.068	1.077	1.077	1.077		N	1.063	1.063	1.063			N	SP	1.064	1.064	1.064	1.061	1.061	1.061	1.068	1.068	1.068	1.076	1.076	1.076		N	SP	1.057	1.057	1.057	1.053	1.053	1.053	1.059	1.059	1.059	1.066	1.066	1.066
N2H2	3.303	2.006	2.669	4.313	2.147	3.004	3.47	2.039	2.818	3.498	2.068	2.872		N2H2	3.303	2.006	2.669			N2H2	SP	3.303	2.005	2.667	4.314	2.142	3.004	3.474	2.041	2.825	3.504	2.068	2.878		N2H2	SP	3.299	1.995	2.661	4.312	2.127	3.001	3.475	2.035	2.831	3.508	2.06	2.883
Na	28.193	28.193	28.193	24.343	24.343	24.343	24.562	24.562	24.562	24.32	24.32	24.32		Na	28.193	28.193	28.193			Na	SP	28.175	28.175	28.175	24.676	24.676	24.676	24.88	24.88	24.88	24.679	24.679	24.679		Na	SP	28.141	28.141	28.141	25.123	25.123	25.123	25.307	25.307	25.307	25.162	25.162	25.162
Na2	34.778	34.778	80.06	29.33	29.33	21.511	30.672	30.672	52.563	30.434	30.434	55.115		Na2	34.778	34.778	80.06			Na2	SP	34.773	34.773	80.074	29.664	29.664	23.784	30.908	30.908	53.252	30.704	30.704	55.765		Na2	SP	34.731	34.731	79.984	30.087	30.087	26.789	31.196	31.196	54.087	31.039	31.039	56.547
NaLi	31.175	31.175	80.047	25.885	25.885	-17.121	27.584	27.584	47.193	27.512	27.512	50.347		NaLi	31.175	31.175	80.047			NaLi	SP	31.169	31.169	80.065	26.14	26.14	-13.943	27.722	27.722	47.788	27.663	27.663	50.781		NaLi	SP	31.141	31.141	79.999	26.469	26.469	-9.679	27.891	27.891	48.513	27.85	27.85	51.285
NH	1.257	1.257	1.604	1.329	1.329	1.674	1.316	1.316	1.672	1.333	1.333	1.696		NH	1.257	1.257	1.604			NH	SP	1.255	1.255	1.603	1.324	1.324	1.677	1.312	1.312	1.677	1.327	1.327	1.7		NH	SP	1.245	1.245	1.596	1.31	1.31	1.676	1.299	1.299	1.678	1.312	1.312	1.7
NH2	1.452	1.774	1.749	1.584	1.856	1.92	1.549	1.836	1.88	1.573	1.861	1.922		NH2	1.452	1.774	1.749			NH2	SP	1.449	1.775	1.745	1.577	1.86	1.916	1.545	1.842	1.88	1.567	1.866	1.92		NH2	SP	1.432	1.772	1.732	1.555	1.861	1.903	1.526	1.846	1.872	1.546	1.869	1.91
NO	1.362	1.362	2.269	1.472	1.472	0.513	1.461	1.461	2.201	1.491	1.491	2.191		NO	1.362	1.362	2.269			NO	SP	1.36	1.36	2.267	1.466	1.466	0.534	1.46	1.46	2.206	1.488	1.488	2.193		NO	SP	1.345	1.345	2.258	1.445	1.445	0.557	1.447	1.447	2.207	1.472	1.472	2.189
NOCl	4.789	6.781	3.188	1.255	5.233	3.543	4.743	7.139	3.332	4.695	7.051	3.389		NOCl	4.789	6.781	3.188			NOCl	SP	4.791	6.782	3.191	1.535	5.541	3.526	4.765	7.153	3.341	4.72	7.079	3.393		NOCl	SP	4.746	6.761	3.148	1.871	5.941	3.455	4.748	7.15	3.306	4.706	7.095	3.351
NP	3.688	3.688	5.591	3.364	3.364	7.049	3.494	3.494	5.375	3.517	3.517	5.422		NP	3.688	3.688	5.591			NP	SP	3.687	3.687	5.591	3.367	3.367	7.038	3.5	3.5	5.383	3.522	3.522	5.434		NP	SP	3.674	3.674	5.588	3.359	3.359	7.02	3.496	3.496	5.391	3.517	3.517	5.447
O2	1.157	1.157	2.685	1.17	1.17	1.8	1.196	1.196	2.284	1.211	1.211	2.264		O2	1.157	1.157	2.685			O2	SP	1.155	1.155	2.684	1.172	1.172	1.801	1.195	1.195	2.284	1.21	1.21	2.264		O2	SP	1.132	1.132	2.677	1.154	1.154	1.797	1.174	1.174	2.278	1.188	1.188	2.259
O3	1.587	3.334	1.854	1.744	4.404	2.124	1.709	4.31	2.069	1.745	4.586	2.126		O3	1.587	3.334	1.854			O3	SP	1.588	3.334	1.852	1.737	4.405	2.118	1.706	4.317	2.068	1.739	4.589	2.12		O3	SP	1.571	3.326	1.837	1.709	4.398	2.098	1.684	4.319	2.054	1.713	4.585	2.1
OCl	2.388	2.388	3.726	2.438	2.438	4.324	2.397	2.397	4.112	2.418	2.418	4.175		OCl	2.388	2.388	3.726			OCl	SP	2.387	2.387	3.726	2.433	2.433	4.322	2.398	2.398	4.119	2.416	2.416	4.179		OCl	SP	2.351	2.351	3.703	2.391	2.391	4.296	2.365	2.365	4.105	2.379	2.379	4.161
OF	0.983	0.983	1.951	1.1	1.1	1.835	1.072	1.072	2.006	1.095	1.095	2.033		OF	0.983	0.983	1.951			OF	SP	0.982	0.982	1.948	1.09	1.09	1.831	1.067	1.067	2.004	1.087	1.087	2.03		OF	SP	0.961	0.961	1.934	1.057	1.057	1.816	1.04	1.04	1.992	1.056	1.056	2.016
OF2	1.267	3.168	1.938	1.429	2.472	2.211	1.414	2.92	1.955	1.453	2.953	1.981		OF2	1.267	3.168	1.938			OF2	SP	1.267	3.166	1.935	1.422	2.355	2.2	1.411	2.913	1.948	1.446	2.944	1.973		OF2	SP	1.246	3.148	1.915	1.391	2.18	2.169	1.386	2.888	1.923	1.416	2.917	1.946
OH	0.966	0.966	1.164	1.113	1.113	1.25	1.08	1.08	1.235	1.11	1.11	1.257		OH	0.966	0.966	1.164			OH	SP	0.962	0.962	1.163	1.103	1.103	1.25	1.076	1.076	1.238	1.104	1.104	1.259		OH	SP	0.939	0.939	1.156	1.072	1.072	1.245	1.053	1.053	1.236	1.078	1.078	1.256
P	3.783	3.783	3.783	3.692	3.692	3.692	3.702	3.702	3.702	3.715	3.715	3.715		P	3.783	3.783	3.783			P	SP	3.784	3.784	3.784	3.695	3.695	3.695	3.702	3.702	3.702	3.714	3.714	3.714		P	SP	3.777	3.777	3.777	3.691	3.691	3.691	3.693	3.693	3.693	3.704	3.704	3.704
PH	3.916	3.916	4.327	3.936	3.936	4.394	3.896	3.896	4.344	3.915	3.915	4.37		PH	3.916	3.916	4.327			PH	SP	3.917	3.917	4.327	3.937	3.937	4.398	3.897	3.897	4.349	3.915	3.915	4.374		PH	SP	3.909	3.909	4.312	3.929	3.929	4.388	3.889	3.889	4.341	3.906	3.906	4.364
PH2	4.067	4.385	4.429	4.114	4.445	4.537	4.063	4.391	4.466	4.085	4.414	4.503		PH2	4.067	4.385	4.429			PH2	SP	4.068	4.385	4.429	4.118	4.446	4.541	4.068	4.395	4.473	4.09	4.417	4.508		PH2	SP	4.061	4.378	4.413	4.115	4.441	4.531	4.067	4.393	4.466	4.089	4.414	4.499
S2	4.63	4.63	9.619	4.67	4.67	8.204	4.618	4.618	8.804	4.657	4.657	8.686		S2	4.63	4.63	9.619			S2	SP	4.636	4.636	9.619	4.683	4.683	8.206	4.641	4.641	8.801	4.676	4.676	8.686		S2	SP	4.598	4.598	9.61	4.655	4.655	8.2	4.626	4.626	8.788	4.656	4.656	8.677
SCl	4.237	4.237	6.809	4.424	4.424	7.192	4.323	4.323	7.077	4.389	4.389	7.196		SCl	4.237	4.237	6.809			SCl	SP	4.245	4.245	6.807	4.434	4.434	7.189	4.352	4.352	7.091	4.414	4.414	7.205		SCl	SP	4.201	4.201	6.767	4.393	4.393	7.147	4.337	4.337	7.073	4.393	4.393	7.18
SF	3.062	3.062	3.364	3.216	3.216	3.612	3.143	3.143	3.542	3.197	3.197	3.608		SF	3.062	3.062	3.364			SF	SP	3.061	3.061	3.368	3.217	3.217	3.615	3.157	3.157	3.553	3.207	3.207	3.616		SF	SP	3.019	3.019	3.348	3.178	3.178	3.594	3.135	3.135	3.542	3.18	3.18	3.602
SH	3.377	3.377	3.41	3.469	3.469	3.472	3.4	3.4	3.426	3.439	3.439	3.454		SH	3.377	3.377	3.41			SH	SP	3.383	3.383	3.409	3.484	3.484	3.475	3.426	3.426	3.434	3.464	3.464	3.46		SH	SP	3.345	3.345	3.379	3.458	3.458	3.45	3.415	3.415	3.416	3.452	3.452	3.44
SO-trip	2.847	2.847	4.583	2.918	2.918	3.948	2.906	2.906	4.379	2.942	2.942	4.351		SO-trip	2.847	2.847	4.583			SO-trip	SP	2.844	2.844	4.584	2.914	2.914	3.948	2.906	2.906	4.381	2.939	2.939	4.353		SO-trip	SP	2.811	2.811	4.579	2.88	2.88	3.941	2.877	2.877	4.378	2.906	2.906	4.349
CN	1.955	1.955	2.762	2.539	2.539	3.322	2.333	2.333	3.546	2.405	2.405	3.782		CN	1.955	1.955	2.762			CN	SP	1.956	1.956	2.762	2.536	2.536	3.319	2.339	2.339	3.559	2.409	2.409	3.789		CN	SP	1.951	1.951	2.767	2.526	2.526	3.32	2.341	2.341	3.582	2.408	2.408	3.803
P2	6.038	6.038	9.868	6.17	6.17	11.094	5.917	5.917	10.163	5.923	5.923	10.155		P2	6.038	6.038	9.868			P2	SP	6.039	6.039	9.867	6.158	6.158	11.099	5.925	5.925	10.171	5.931	5.931	10.166		P2	SP	6.02	6.02	9.857	6.121	6.121	11.097	5.916	5.916	10.173	5.922	5.922	10.173
PS	5.184	5.184	9.637	5.219	5.219	12.027	5.089	5.089	9.332	5.112	5.112	9.373		PS	5.184	5.184	9.637			PS	SP	5.187	5.187	9.637	5.209	5.209	12.017	5.099	5.099	9.333	5.119	5.119	9.386		PS	SP	5.155	5.155	9.619	5.159	5.159	11.985	5.076	5.076	9.316	5.093	5.093	9.386
CH3	2.258	2.258	2.183	2.349	2.349	2.375	2.319	2.319	2.31	2.341	2.341	2.341		CH3	2.258	2.258	2.183			CH3	SP	2.256	2.256	2.185	2.346	2.346	2.376	2.318	2.318	2.315	2.339	2.339	2.344		CH3	SP	2.247	2.247	2.176	2.336	2.336	2.366	2.311	2.31	2.31	2.33	2.33	2.337
NCO	2.235	2.235	4.843	2.248	2.248	3.995	2.261	2.261	4.835	2.284	2.284	4.826		NCO	2.235	2.235	4.843			NCO	SP	2.233	2.233	4.842	2.247	2.247	4.009	2.263	2.263	4.845	2.285	2.285	4.833		NCO	SP	2.217	2.217	4.84	2.233	2.233	4.028	2.253	2.253	4.858	2.273	2.273	4.842
FCO	3.013	2.191	1.862	3.12	2.474	2.045	3.271	2.354	1.987	3.32	2.404	2.027		FCO	3.013	2.191	1.862			FCO	SP	3.013	2.19	1.859	3.128	2.474	2.04	3.28	2.362	1.988	3.328	2.41	2.027		FCO	SP	3.006	2.177	1.84	3.132	2.463	2.018	3.286	2.361	1.975	3.332	2.407	2.012
SiH3	4.861	4.861	4.77	4.99	4.99	4.954	4.983	4.983	4.942	5.013	5.012	4.982		SiH3	4.861	4.861	4.77			SiH3	SP	4.86	4.86	4.768	4.991	4.991	4.956	4.986	4.986	4.946	5.015	5.015	4.985		SiH3	SP	4.863	4.863	4.775	4.997	4.997	4.968	4.995	4.995	4.961	5.022	5.023	4.999
																				aQZ vs CBS															aTZ vs CBS
																				Components	RMSE	0.199188	0.191242	0.165825	1.99947	0.804455	4.4288	0.441466	0.438456	0.44812	0.468811	0.465236	0.448826		Components	RMSE	1.15007	1.10641	0.820051	4.55787	2.18798	10.5939	1.22686	1.20649	1.14569	1.39481	1.36407	1.22015
																					ME	-0.0398535	-0.034401	-0.0270604	0.179519	0.0351585	0.281648	0.195494	0.206933	0.218153	0.143222	0.161391	0.172717			ME	-0.733777	-0.667469	-0.405259	-0.199421	-0.472168	0.353582	-0.154448	-0.0753288	0.182915	-0.268112	-0.175034	0.0827353
																					MAX	1.42857	1.42857	1.42857	22.3108	5.88573	43.8776	2.07792	2.07792	2.07792	2.53807	2.53807	2.53807			MAX	6.85714	6.85714	6.85714	49.0837	13.5295	105.306	8.05195	8.05195	8.05195	9.13706	9.13706	9.13706
																								HF			MP2			CCSD			CCSD(T)						HF			MP2			CCSD			CCSD(T)
																				Net	RMSE			0.19			2.84			0.44			0.46		Net	RMSE			1.04			6.78			1.19			1.33
																					ME			-0.03			0.17			0.21			0.16			ME			-0.6			-0.11			-0.02			-0.12
																					MAX			1.43			43.88			2.08			2.54			MAX			6.86			105.31			8.05			9.14

## Sheet: RMP2 Data and Extrapolation
CBS	Type	HF-XX	HF-YY	HF-ZZ	MP2-XX	MP2-YY	MP2-ZZ		a5Z	HF-XX	HF-YY	HF-ZZ			aQZ	HF-XX	HF-YY	HF-ZZ	MP2-XX	MP2-YY	MP2-ZZ		aTZ	HF-XX	HF-YY	HF-ZZ	MP2-XX	MP2-YY	MP2-ZZ
Be	SP	6.818	6.818	6.818	6.27	6.27	6.27		Be	6.818	6.818	6.818			Be	6.799	6.799	6.799	6.261	6.261	6.261		Be	6.774	6.774	6.774	6.25	6.25	6.25
BeH	SP	5.411	5.411	3.706	5.427	5.427	3.761		BeH	5.411	5.411	3.706			BeH	5.401	5.401	3.698	5.419	5.419	3.761		BeH	5.382	5.382	3.686	5.403	5.403	3.76
BH2	SP	2.776	2.899	2.838	2.839	2.989	2.894		BH2	2.776	2.899	2.838			BH2	2.776	2.9	2.836	2.839	2.996	2.897		BH2	2.775	2.901	2.836	2.838	3.005	2.904
BN	SP	2.901	2.901	3.578	3.103	3.103	3.959		BN	2.901	2.901	3.578			BN	2.9	2.9	3.577	3.111	3.111	3.967		BN	2.894	2.894	3.576	3.118	3.118	3.979
BO	SP	2.125	2.125	2.518	2.298	2.298	2.892		BO	2.125	2.125	2.518			BO	2.123	2.123	2.518	2.3	2.3	2.897		BO	2.113	2.113	2.517	2.296	2.296	2.903
BS	SP	4.4	4.4	6.142	4.382	4.382	6.436		BS	4.4	4.4	6.142			BS	4.402	4.402	6.14	4.399	4.399	6.45		BS	4.386	4.386	6.137	4.404	4.404	6.469
C2H	SP	3.218	3.218	4.033	3.236	3.236	3.85		C2H	3.218	3.218	4.033			C2H	3.217	3.217	4.034	3.247	3.247	3.859		C2H	3.206	3.206	4.031	3.253	3.253	3.867
C2H3	SP	3.332	5.196	3.258	3.46	4.97	3.188		C2H3	3.332	5.196	3.258			C2H3	3.327	5.196	3.257	3.461	4.975	3.196		C2H3	3.31	5.197	3.247	3.452	4.983	3.199
CH2F	SP	2.031	2.311	2.192	2.241	2.552	2.325		CH2F	2.031	2.311	2.192			CH2F	2.027	2.311	2.189	2.236	2.552	2.323		CH2F	2.01	2.303	2.176	2.217	2.544	2.311
CH2NH	SP	3.078	2.519	4.333	3.242	2.546	4.18		CH2NH	3.078	2.519	4.333			CH2NH	3.077	2.519	4.332	3.247	2.55	4.183		CH2NH	3.069	2.509	4.332	3.247	2.546	4.189
CH2PH	SP	8.087	5.173	5.643	7.426	4.97	5.68		CH2PH	8.087	5.173	5.643			CH2PH	8.087	5.17	5.641	7.432	4.984	5.69		CH2PH	8.088	5.152	5.62	7.441	4.989	5.685
CH2-t	SP	1.997	2.233	1.901	2.118	2.295	2.02		CH2-t	1.997	2.233	1.901			CH2-t	1.998	2.23	1.9	2.118	2.293	2.016		CH2-t	1.992	2.223	1.892	2.111	2.288	2.004
CH3O	SP	3.647	2.62	2.995	4.094	2.768	3.312		CH3O	3.647	2.62	2.995			CH3O	3.645	2.619	2.997	4.095	2.768	3.317		CH3O	3.626	2.61	2.996	4.08	2.76	3.32
F2	SP	0.823	0.823	2.168	0.963	0.963	1.702		F2	0.823	0.823	2.168			F2	0.822	0.822	2.164	0.95	0.95	1.694		F2	0.799	0.799	2.146	0.911	0.911	1.671
FH-OH	SP	1.701	1.432	1.987	1.893	1.62	2.269		FH-OH	1.701	1.432	1.987			FH-OH	1.695	1.425	1.986	1.881	1.603	2.27		FH-OH	1.668	1.392	1.98	1.846	1.556	2.267
H2CN	SP	2.224	2.653	3.606	2.268	2.772	3.597		H2CN	2.224	2.653	3.606			H2CN	2.225	2.652	3.606	2.273	2.775	3.601		H2CN	2.215	2.641	3.607	2.268	2.77	3.607
H2O-Li	SP	41.693	37.163	32.684	39.454	34.426	41.65		H2O-Li	41.693	37.163	32.684			H2O-Li	41.655	37.117	32.681	39.519	34.481	41.67		H2O-Li	41.433	36.952	32.687	39.438	34.454	41.708
HCHS	SP	4.01	4.529	6.951	3.898	4.607	6.498		HCHS	4.01	4.529	6.951			HCHS	4.015	4.529	6.949	3.912	4.619	6.504		HCHS	3.973	4.486	6.937	3.883	4.592	6.503
HCO	SP	2.426	2.819	1.808	2.653	3.267	1.958		HCO	2.426	2.819	1.808			HCO	2.424	2.82	1.805	2.654	3.269	1.956		HCO	2.413	2.813	1.79	2.647	3.263	1.942
HCP	SP	4.629	4.629	7.138	4.444	4.444	6.802		HCP	4.629	4.629	7.138			HCP	4.627	4.627	7.14	4.459	4.459	6.813		HCP	4.598	4.598	7.143	4.453	4.453	6.829
HNO	SP	1.54	2.059	2.795	1.589	2.318	2.64		HNO	1.54	2.059	2.795			HNO	1.536	2.055	2.795	1.584	2.315	2.641		HNO	1.516	2.036	2.789	1.562	2.298	2.637
HNS	SP	5.993	3.87	3.392	5.296	4.041	3.327		HNS	5.993	3.87	3.392			HNS	5.99	3.873	3.393	5.294	4.051	3.331		HNS	5.972	3.834	3.353	5.278	4.021	3.295
HO2	SP	1.543	2.311	1.328	1.722	2.708	1.494		HO2	1.543	2.311	1.328			HO2	1.541	2.308	1.326	1.715	2.705	1.484		HO2	1.526	2.297	1.309	1.693	2.694	1.456
HOF	SP	1.362	1.158	2.476	1.531	1.365	2.218		HOF	1.362	1.158	2.476			HOF	1.359	1.156	2.472	1.524	1.356	2.211		HOF	1.341	1.135	2.455	1.5	1.325	2.19
Li	SP	25.234	25.234	25.234	24.457	24.457	24.457		Li	25.234	25.234	25.234			Li	25.388	25.388	25.388	24.694	24.694	24.694		Li	25.113	25.113	25.113	24.533	24.533	24.533
Li2	SP	26.487	26.487	36.853	25.023	25.023	38.345		Li2	26.487	26.487	36.853			Li2	26.469	26.469	36.838	25.073	25.073	38.528		Li2	26.438	26.438	36.852	25.135	25.135	38.813
N	SP	1.091	1.091	1.091	1.056	1.056	1.056		N	1.091	1.091	1.091			N	1.091	1.091	1.091	1.057	1.057	1.057		N	1.083	1.083	1.083	1.05	1.05	1.05
N2H2	SP	3.558	2.024	2.708	3.366	2.073	2.874		N2H2	3.558	2.024	2.708			N2H2	3.557	2.023	2.706	3.369	2.074	2.877		N2H2	3.552	2.01	2.699	3.369	2.064	2.877
Na	SP	28.24	28.24	28.24	24.353	24.353	24.353		Na	28.24	28.24	28.24			Na	28.22	28.22	28.22	24.685	24.685	24.685		Na	28.185	28.185	28.185	25.132	25.132	25.132
Na2	SP	34.091	34.091	52.942	29.797	29.797	51.991		Na2	34.091	34.091	52.942			Na2	34.098	34.098	52.984	30.049	30.049	52.383		Na2	34.067	34.067	53.03	30.354	30.354	52.908
NaLi	SP	30.132	30.132	44.796	27.44	27.44	45.451		NaLi	30.132	30.132	44.796			NaLi	30.133	30.133	44.818	27.58	27.58	45.719		NaLi	30.123	30.123	44.867	27.761	27.761	46.105
NH	SP	1.286	1.286	1.594	1.321	1.321	1.668		NH	1.286	1.286	1.594			NH	1.285	1.285	1.593	1.319	1.319	1.67		NH	1.273	1.273	1.587	1.305	1.305	1.668
NH2	SP	1.472	1.774	1.741	1.588	1.856	1.915		NH2	1.472	1.774	1.741			NH2	1.468	1.775	1.738	1.58	1.86	1.913		NH2	1.452	1.772	1.724	1.558	1.861	1.9
NO	SP	1.361	1.361	2.208	1.49	1.49	2.281		NO	1.361	1.361	2.208			NO	1.36	1.36	2.207	1.488	1.488	2.279		NO	1.344	1.344	2.201	1.47	1.47	2.272
NOCl	SP	4.697	7.083	3.227	4.822	6.891	3.445		NOCl	4.697	7.083	3.227			NOCl	4.701	7.082	3.23	4.821	6.897	3.44		NOCl	4.659	7.056	3.183	4.772	6.881	3.382
NP	SP	3.571	3.571	5.36	3.554	3.554	5.346		NP	3.571	3.571	5.36			NP	3.57	3.57	5.359	3.564	3.564	5.352		NP	3.552	3.552	5.357	3.561	3.561	5.36
O2	SP	1.111	1.111	2.739	1.221	1.221	6.732		O2	1.111	1.111	2.739			O2	1.111	1.111	2.739	1.213	1.213	6.766		O2	1.095	1.095	2.739	1.186	1.186	6.813
O3	SP	1.674	5.835	1.896	1.738	3.181	2.1		O3	1.674	5.835	1.896			O3	1.672	5.831	1.892	1.732	3.186	2.092		O3	1.643	5.808	1.87	1.698	3.176	2.064
OCl	SP	2.405	2.405	3.638	2.521	2.521	4.266		OCl	2.405	2.405	3.638			OCl	2.406	2.406	3.638	2.518	2.518	4.264		OCl	2.371	2.371	3.615	2.478	2.478	4.238
OF	SP	0.983	0.983	1.938	1.098	1.098	1.9		OF	0.983	0.983	1.938			OF	0.981	0.981	1.936	1.087	1.087	1.896		OF	0.961	0.961	1.922	1.055	1.055	1.879
OF2	SP	1.266	3.125	1.928	1.471	2.727	1.963		OF2	1.266	3.125	1.928			OF2	1.266	3.123	1.926	1.461	2.719	1.953		OF2	1.245	3.106	1.905	1.426	2.694	1.921
OH	SP	0.959	0.959	1.161	1.111	1.111	1.249		OH	0.959	0.959	1.161			OH	0.955	0.955	1.16	1.1	1.1	1.249		OH	0.933	0.933	1.153	1.069	1.069	1.243
P	SP	3.785	3.785	3.785	3.696	3.696	3.696		P	3.785	3.785	3.785			P	3.787	3.787	3.787	3.702	3.702	3.702		P	3.779	3.779	3.779	3.7	3.7	3.7
PH	SP	3.979	3.979	4.346	3.909	3.909	4.386		PH	3.979	3.979	4.346			PH	3.98	3.98	4.346	3.916	3.916	4.39		PH	3.969	3.969	4.329	3.913	3.913	4.379
PH2	SP	4.137	4.409	4.447	4.104	4.437	4.532		PH2	4.137	4.409	4.447			PH2	4.138	4.409	4.448	4.113	4.441	4.538		PH2	4.128	4.4	4.431	4.114	4.437	4.528
S2	SP	4.61	4.61	10.427	4.704	4.704	5.649		S2	4.61	4.61	10.427			S2	4.616	4.616	10.427	4.709	4.709	5.715		S2	4.584	4.584	10.4	4.676	4.676	5.778
SCl	SP	4.233	4.233	6.796	4.422	4.422	7.18		SCl	4.233	4.233	6.796			SCl	4.241	4.241	6.795	4.432	4.432	7.178		SCl	4.198	4.198	6.755	4.392	4.392	7.136
SF	SP	3.058	3.058	3.369	3.215	3.215	3.608		SF	3.058	3.058	3.369			SF	3.058	3.058	3.373	3.216	3.216	3.611		SF	3.017	3.017	3.353	3.177	3.177	3.59
SH	SP	3.373	3.373	3.415	3.465	3.465	3.469		SH	3.373	3.373	3.415			SH	3.38	3.38	3.415	3.48	3.48	3.473		SH	3.343	3.343	3.385	3.454	3.454	3.448
SO-trip	SP	2.795	2.795	4.347	3.012	3.012	4.784		SO-trip	2.795	2.795	4.347			SO-trip	2.79	2.79	4.348	3.003	3.003	4.775		SO-trip	2.758	2.758	4.344	2.966	2.966	4.757
CN	SP	2.599	2.599	2.975	2.74	2.74	3.441		CN	2.599	2.599	2.975			CN	2.6	2.6	2.975	2.752	2.752	3.446		CN	2.593	2.593	2.979	2.76	2.76	3.457
P2	SP	6.183	6.183	10.423	5.908	5.908	10.058		P2	6.183	6.183	10.423			P2	6.186	6.186	10.423	5.936	5.936	10.071		P2	6.149	6.149	10.42	5.933	5.933	10.086
PS	SP	5.571	5.571	9.251	5.699	5.699	9.465		PS	5.571	5.571	9.251			PS	5.576	5.576	9.25	5.714	5.714	9.476		PS	5.534	5.534	9.224	5.686	5.686	9.466
CH3	SP	2.275	2.275	2.245	2.349	2.349	2.378		CH3	2.275	2.275	2.245			CH3	2.273	2.273	2.247	2.348	2.348	2.383		CH3	2.262	2.262	2.235	2.338	2.338	2.375
NCO	SP	2.176	2.176	4.38	2.312	2.312	4.9		NCO	2.176	2.176	4.38			NCO	2.174	2.174	4.379	2.311	2.311	4.902		NCO	2.158	2.158	4.379	2.296	2.296	4.906
FCO	SP	2.961	2.134	1.843	3.398	2.508	2.03		FCO	2.961	2.134	1.843			FCO	2.961	2.132	1.84	3.399	2.508	2.027		FCO	2.956	2.119	1.82	3.395	2.498	2.007
SiH3	SP	4.861	4.861	4.742	4.996	4.996	4.96		SiH3	4.861	4.861	4.742			SiH3	4.859	4.859	4.74	4.995	4.995	4.962		SiH3	4.863	4.863	4.746	5.001	5.001	4.974
AlF	NSP	6.511	6.511	5.101	6.047	6.047	5.237		AlF	6.511	6.511	5.101			AlF	6.508	6.508	5.1	6.067	6.067	5.259		AlF	6.479	6.479	5.08	6.07	6.07	5.271
Ar	NSP	1.589	1.589	1.589	1.641	1.641	1.641		Ar	1.589	1.589	1.589			Ar	1.593	1.593	1.593	1.644	1.644	1.644		Ar	1.556	1.556	1.556	1.605	1.605	1.605
BeH2	NSP	2.791	2.791	2.883	2.851	2.851	2.931		BeH2	2.791	2.791	2.883			BeH2	2.79	2.79	2.882	2.851	2.851	2.934		BeH2	2.788	2.788	2.894	2.851	2.851	2.952
BF	NSP	3.07	3.07	2.478	3.07	3.07	2.713		BF	3.07	3.07	2.478			BF	3.068	3.068	2.478	3.07	3.07	2.721		BF	3.058	3.058	2.481	3.063	3.063	2.735
BH2Cl	NSP	3.468	3.951	5.119	3.562	4.056	5.48		BH2Cl	3.468	3.951	5.119			BH2Cl	3.468	3.952	5.119	3.567	4.064	5.49		BH2Cl	3.45	3.933	5.114	3.556	4.054	5.499
BH2F	NSP	1.977	2.536	2.381	2.085	2.651	2.626		BH2F	1.977	2.536	2.381			BH2F	1.975	2.535	2.382	2.083	2.653	2.631		BH2F	1.966	2.527	2.383	2.074	2.649	2.638
BH3	NSP	2.676	2.676	2.046	2.721	2.721	2.09		BH3	2.676	2.676	2.046			BH3	2.677	2.677	2.046	2.725	2.725	2.09		BH3	2.677	2.677	2.048	2.729	2.729	2.092
BHF2	NSP	1.886	2.287	2.273	2.063	2.614	2.528		BHF2	1.886	2.287	2.273			BHF2	1.884	2.287	2.273	2.06	2.617	2.53		BHF2	1.871	2.285	2.265	2.045	2.619	2.525
C2H2	NSP	2.879	2.879	4.669	2.778	2.778	4.488		C2H2	2.879	2.879	4.669			C2H2	2.877	2.877	4.67	2.785	2.785	4.496		C2H2	2.86	2.86	4.668	2.781	2.781	4.504
C2H4	NSP	3.422	3.678	5.481	3.331	3.743	5.101		C2H4	3.422	3.678	5.481			C2H4	3.421	3.673	5.482	3.342	3.745	5.107		C2H4	3.411	3.655	5.484	3.348	3.737	5.116
CH2BH	NSP	4.362	3.587	5.926	4.209	3.654	5.745		CH2BH	4.362	3.587	5.926			CH2BH	4.362	3.584	5.923	4.229	3.659	5.749		CH2BH	4.356	3.571	5.919	4.25	3.657	5.755
CH3BH2	NSP	3.603	4.583	4.16	3.706	4.873	4.26		CH3BH2	3.603	4.583	4.16			CH3BH2	3.603	4.584	4.16	3.71	4.881	4.265		CH3BH2	3.603	4.585	4.16	3.716	4.891	4.272
CH3Cl	NSP	3.833	3.833	5.318	3.962	3.962	5.432		CH3Cl	3.833	3.833	5.318			CH3Cl	3.834	3.834	5.316	3.964	3.964	5.436		CH3Cl	3.799	3.799	5.299	3.931	3.931	5.427
CH3F	NSP	2.271	2.271	2.403	2.389	2.389	2.581		CH3F	2.271	2.271	2.403			CH3F	2.27	2.27	2.405	2.389	2.389	2.586		CH3F	2.261	2.261	2.403	2.382	2.382	2.588
CH3NH2	NSP	3.91	3.381	3.396	4.164	3.649	3.535		CH3NH2	3.91	3.381	3.396			CH3NH2	3.91	3.38	3.396	4.168	3.652	3.539		CH3NH2	3.908	3.377	3.395	4.171	3.655	3.543
CH3OH	NSP	2.874	3.206	2.745	3.019	3.438	2.948		CH3OH	2.874	3.206	2.745			CH3OH	2.874	3.207	2.744	3.023	3.443	2.948		CH3OH	2.871	3.204	2.737	3.025	3.445	2.943
CH3SH	NSP	6.196	4.892	4.875	6.361	5.027	5.035		CH3SH	6.196	4.892	4.875			CH3SH	6.194	4.891	4.876	6.365	5.032	5.045		CH3SH	6.176	4.868	4.848	6.355	5.017	5.029
CH4	NSP	2.372	2.372	2.372	2.445	2.445	2.445		CH4	2.372	2.372	2.372			CH4	2.372	2.372	2.372	2.447	2.447	2.447		CH4	2.372	2.372	2.372	2.45	2.45	2.45
Cl2	NSP	3.546	3.546	6.244	3.705	3.705	6.187		Cl2	3.546	3.546	6.244			Cl2	3.554	3.554	6.244	3.709	3.709	6.18		Cl2	3.509	3.509	6.197	3.659	3.659	6.124
ClCN	NSP	3.332	3.332	6.477	3.39	3.39	6.582		ClCN	3.332	3.332	6.477			ClCN	3.334	3.334	6.475	3.396	3.396	6.586		ClCN	3.313	3.313	6.466	3.381	3.381	6.585
ClF	NSP	2.242	2.242	3.307	2.38	2.38	3.325		ClF	2.242	2.242	3.307			ClF	2.241	2.241	3.308	2.373	2.373	3.32		ClF	2.204	2.204	3.285	2.328	2.328	3.289
CO	NSP	1.671	1.671	2.145	1.765	1.765	2.302		CO	1.671	1.671	2.145			CO	1.671	1.671	2.147	1.767	1.767	2.308		CO	1.665	1.665	2.148	1.764	1.764	2.314
CO2	NSP	1.776	1.776	3.518	1.917	1.917	4.069		CO2	1.776	1.776	3.518			CO2	1.774	1.774	3.518	1.915	1.915	4.071		CO2	1.754	1.754	3.518	1.895	1.895	4.074
CS	NSP	3.548	3.548	5.494	3.479	3.479	5.564		CS	3.548	3.548	5.494			CS	3.55	3.55	5.495	3.493	3.493	5.576		CS	3.536	3.536	5.49	3.496	3.496	5.586
CSO	NSP	3.765	3.765	7.277	3.808	3.808	7.949		CSO	3.765	3.765	7.277			CSO	3.768	3.768	7.278	3.818	3.818	7.959		CSO	3.744	3.744	7.272	3.804	3.804	7.965
FCN	NSP	2.127	2.127	3.554	2.158	2.158	3.679		FCN	2.127	2.127	3.554			FCN	2.126	2.126	3.554	2.161	2.161	3.683		FCN	2.11	2.11	3.553	2.15	2.15	3.687
FNO	NSP	3.244	2.296	1.598	3.355	2.428	1.761		FNO	3.244	2.296	1.598			FNO	3.242	2.294	1.595	3.352	2.424	1.752		FNO	3.229	2.281	1.574	3.337	2.408	1.723
H	NSP	0.667	0.667	0.667	0.667	0.667	0.667		H	0.667	0.667	0.667			H	0.667	0.667	0.667	0.667	0.667	0.667		H	0.664	0.664	0.664	0.664	0.664	0.664
H2	NSP	0.683	0.683	0.958	0.678	0.678	0.953		H2	0.683	0.683	0.958			H2	0.685	0.685	0.957	0.681	0.681	0.953		H2	0.687	0.687	0.957	0.684	0.684	0.954
H2O	NSP	1.169	1.362	1.263	1.4	1.472	1.432		H2O	1.169	1.362	1.263			H2O	1.164	1.362	1.259	1.39	1.474	1.425		H2O	1.146	1.359	1.244	1.365	1.474	1.406
HBO	NSP	1.991	1.991	2.887	2.144	2.144	3.25		HBO	1.991	1.991	2.887			HBO	1.988	1.988	2.888	2.145	2.145	3.255		HBO	1.979	1.979	2.885	2.141	2.141	3.258
HBS	NSP	4.313	4.313	6.522	4.242	4.242	6.715		HBS	4.313	4.313	6.522			HBS	4.314	4.314	6.52	4.258	4.258	6.728		HBS	4.298	4.298	6.514	4.263	4.263	6.742
HCCCl	NSP	4.005	4.005	8.165	4.008	4.008	8.182		HCCCl	4.005	4.005	8.165			HCCCl	4.005	4.005	8.164	4.014	4.014	8.191		HCCCl	3.977	3.977	8.155	3.994	3.994	8.196
HCCF	NSP	2.805	2.805	4.699	2.766	2.766	4.78		HCCF	2.805	2.805	4.699			HCCF	2.804	2.804	4.7	2.772	2.772	4.787		HCCF	2.787	2.787	4.698	2.765	2.765	4.793
HCHO	NSP	1.864	2.465	3.18	1.931	2.678	3.292		HCHO	1.864	2.465	3.18			HCHO	1.862	2.464	3.18	1.93	2.68	3.295		HCHO	1.848	2.452	3.179	1.917	2.672	3.298
HCl	NSP	2.393	2.393	2.661	2.486	2.486	2.72		HCl	2.393	2.393	2.661			HCl	2.398	2.398	2.659	2.49	2.49	2.722		HCl	2.353	2.353	2.633	2.444	2.444	2.701
HCN	NSP	2.066	2.066	3.343	2.055	2.055	3.24		HCN	2.066	2.066	3.343			HCN	2.067	2.067	3.342	2.062	2.062	3.243		HCN	2.058	2.058	3.342	2.061	2.061	3.249
HCONH2	NSP	4.604	3.685	2.76	5.218	4.129	3.011		HCONH2	4.604	3.685	2.76			HCONH2	4.602	3.683	2.756	5.221	4.131	3.008		HCONH2	4.598	3.668	2.741	5.224	4.121	2.995
HCOOH	NSP	3.587	3.192	2.236	4.036	3.556	2.428		HCOOH	3.587	3.192	2.236			HCOOH	3.586	3.191	2.232	4.039	3.56	2.425		HCOOH	3.58	3.18	2.213	4.038	3.556	2.407
He	NSP	0.196	0.196	0.196	0.202	0.202	0.202		He	0.196	0.196	0.196			He	0.196	0.196	0.196	0.202	0.202	0.202		He	0.195	0.195	0.195	0.201	0.201	0.201
HF	NSP	0.661	0.661	0.852	0.777	0.777	0.939		HF	0.661	0.661	0.852			HF	0.656	0.656	0.851	0.765	0.765	0.939		HF	0.633	0.633	0.847	0.732	0.732	0.936
HNC	NSP	2.229	2.229	3.309	2.322	2.322	3.463		HNC	2.229	2.229	3.309			HNC	2.228	2.228	3.309	2.325	2.325	3.469		HNC	2.215	2.215	3.309	2.318	2.318	3.477
HOCl	NSP	2.796	2.628	4.247	2.957	2.825	4.182		HOCl	2.796	2.628	4.247			HOCl	2.798	2.63	4.245	2.958	2.824	4.174		HOCl	2.762	2.592	4.218	2.921	2.782	4.139
HOOH	NSP	1.819	2.972	1.618	2.024	2.717	1.882		HOOH	1.819	2.972	1.618			HOOH	1.818	2.969	1.616	2.022	2.714	1.876		HOOH	1.808	2.954	1.601	2.011	2.699	1.855
LiBH4	NSP	4.119	4.119	4.398	4.292	4.292	4.639		LiBH4	4.119	4.119	4.398			LiBH4	4.119	4.119	4.398	4.296	4.296	4.643		LiBH4	4.12	4.12	4.4	4.303	4.303	4.65
LiCl	NSP	3.532	3.532	3.646	3.819	3.819	4.009		LiCl	3.532	3.532	3.646			LiCl	3.529	3.529	3.646	3.829	3.829	4.028		LiCl	3.488	3.488	3.644	3.806	3.806	4.052
LiCN	NSP	3.376	3.628	2.941	3.67	3.825	3.128		LiCN	3.376	3.628	2.941			LiCN	3.377	3.628	2.941	3.68	3.834	3.138		LiCN	3.376	3.628	2.934	3.692	3.847	3.145
LiH	NSP	3.745	3.745	3.24	4.006	4.006	3.463		LiH	3.745	3.745	3.24			LiH	3.745	3.745	3.24	4.016	4.016	3.485		LiH	3.746	3.746	3.238	4.031	4.031	3.513
Mg	NSP	12.094	12.094	12.094	10.654	10.654	10.654		Mg	12.094	12.094	12.094			Mg	12.092	12.092	12.092	10.717	10.717	10.717		Mg	12.083	12.083	12.083	10.797	10.797	10.797
Mg2	NSP	20.519	20.519	37.021	18.467	18.467	32.39		Mg2	20.519	20.519	37.021			Mg2	20.515	20.515	37.01	18.556	18.556	32.592		Mg2	20.503	20.503	36.97	18.671	18.671	32.844
N2	NSP	1.458	1.458	2.228	1.493	1.493	2.113		N2	1.458	1.458	2.228			N2	1.458	1.458	2.228	1.497	1.497	2.115		N2	1.452	1.452	2.228	1.496	1.496	2.118
N2H4	NSP	2.93	3.565	2.868	3.142	3.776	3.194		N2H4	2.93	3.565	2.868			N2H4	2.931	3.564	2.867	3.148	3.777	3.197		N2H4	2.929	3.556	2.864	3.153	3.772	3.2
NaCl	NSP	3.853	3.853	4.253	4.233	4.233	4.877		NaCl	3.853	3.853	4.253			NaCl	3.865	3.865	4.276	4.256	4.256	4.927		NaCl	3.797	3.797	4.25	4.203	4.203	4.938
NaCN	NSP	4.127	3.62	3.194	4.38	4.017	3.436		NaCN	4.127	3.62	3.194			NaCN	4.133	3.628	3.198	4.397	4.034	3.451		NaCN	4.122	3.61	3.181	4.401	4.028	3.449
NaH	NSP	4.719	4.719	5.688	5.166	5.166	6.79		NaH	4.719	4.719	5.688			NaH	4.721	4.721	5.695	5.181	5.181	6.815		NaH	4.717	4.717	5.712	5.195	5.195	6.857
Ne	NSP	0.35	0.35	0.35	0.398	0.398	0.398		Ne	0.35	0.35	0.35			Ne	0.345	0.345	0.345	0.387	0.387	0.387		Ne	0.326	0.326	0.326	0.36	0.36	0.36
NH2Cl	NSP	3.278	3.25	5.017	3.46	3.457	5.015		NH2Cl	3.278	3.25	5.017			NH2Cl	3.281	3.253	5.015	3.464	3.461	5.013		NH2Cl	3.243	3.214	4.989	3.427	3.423	4.987
NH2F	NSP	1.919	2.33	1.899	2.104	2.423	2.073		NH2F	1.919	2.33	1.899			NH2F	1.915	2.328	1.896	2.098	2.421	2.068		NH2F	1.898	2.316	1.88	2.078	2.409	2.049
NH2OH	NSP	2.403	3.178	2.265	2.676	3.255	2.507		NH2OH	2.403	3.178	2.265			NH2OH	2.402	3.176	2.264	2.678	3.255	2.505		NH2OH	2.395	3.168	2.253	2.675	3.25	2.492
NH3	NSP	1.896	1.896	1.973	2.021	2.021	2.29		NH3	1.896	1.896	1.973			NH3	1.896	1.896	1.968	2.022	2.022	2.284		NH3	1.892	1.892	1.953	2.019	2.019	2.268
NH3O	NSP	2.355	2.355	3.215	2.696	2.696	3.703		NH3O	2.355	2.355	3.215			NH3O	2.341	2.341	3.216	2.664	2.664	3.708		NH3O	2.291	2.291	3.21	2.589	2.589	3.708
OCl2	NSP	4.015	7.733	4.468	4.249	7.561	4.67		OCl2	4.015	7.733	4.468			OCl2	4.018	7.733	4.47	4.246	7.553	4.666		OCl2	3.968	7.703	4.426	4.188	7.512	4.614
P2H4	NSP	7.305	10.505	7.31	7.447	10.837	7.481		P2H4	7.305	10.505	7.31			P2H4	7.306	10.503	7.311	7.456	10.85	7.493		P2H4	7.298	10.498	7.301	7.459	10.866	7.498
PH2OH	NSP	4.735	4.661	4.718	4.917	5.015	4.899		PH2OH	4.735	4.661	4.718			PH2OH	4.735	4.66	4.718	4.923	5.021	4.905		PH2OH	4.724	4.658	4.707	4.92	5.028	4.902
PH3	NSP	4.377	4.377	4.533	4.434	4.434	4.673		PH3	4.377	4.377	4.533			PH3	4.377	4.377	4.535	4.438	4.438	4.682		PH3	4.375	4.375	4.523	4.441	4.441	4.68
PH3O	NSP	3.841	3.841	4.387	4.13	4.13	4.985		PH3O	3.841	3.841	4.387			PH3O	3.839	3.839	4.388	4.132	4.132	4.993		PH3O	3.832	3.832	4.397	4.13	4.13	5.011
S2H2	NSP	5.531	8.157	5.501	5.723	8.375	5.694		S2H2	5.531	8.157	5.501			S2H2	5.535	8.153	5.504	5.733	8.372	5.703		S2H2	5.5	8.12	5.469	5.706	8.341	5.676
SCl2	NSP	5.386	9.724	6.889	5.643	10.091	7.106		SCl2	5.386	9.724	6.889			SCl2	5.394	9.723	6.891	5.651	10.083	7.106		SCl2	5.346	9.681	6.839	5.603	10.031	7.051
SF2	NSP	3.009	3.55	3.228	3.211	3.832	3.48		SF2	3.009	3.55	3.228			SF2	3.005	3.551	3.227	3.206	3.829	3.476		SF2	2.96	3.529	3.199	3.159	3.801	3.444
SH2	NSP	3.568	3.545	3.499	3.693	3.602	3.595		SH2	3.568	3.545	3.499			SH2	3.574	3.544	3.498	3.708	3.604	3.597		SH2	3.538	3.516	3.467	3.685	3.58	3.57
SiH3Cl	NSP	5.453	5.453	6.749	5.657	5.657	7.147		SiH3Cl	5.453	5.453	6.749			SiH3Cl	5.454	5.454	6.748	5.662	5.662	7.153		SiH3Cl	5.438	5.438	6.754	5.652	5.652	7.169
SiH3F	NSP	4.012	4.012	3.594	4.215	4.215	3.873		SiH3F	4.012	4.012	3.594			SiH3F	4.011	4.011	3.594	4.215	4.215	3.877		SiH3F	4.008	4.008	3.603	4.213	4.213	3.891
SiH4	NSP	4.398	4.398	4.398	4.556	4.556	4.556		SiH4	4.398	4.398	4.398			SiH4	4.398	4.398	4.398	4.557	4.557	4.557		SiH4	4.407	4.407	4.407	4.568	4.568	4.568
SiO	NSP	3.999	3.999	4.497	4.103	4.103	5.272		SiO	3.999	3.999	4.497			SiO	3.996	3.996	4.498	4.11	4.11	5.285		SiO	3.981	3.981	4.497	4.109	4.109	5.301
SO2	NSP	2.767	4.652	3.086	2.924	5.069	3.46		SO2	2.767	4.652	3.086			SO2	2.762	4.651	3.084	2.917	5.072	3.461		SO2	2.728	4.647	3.067	2.88	5.074	3.448
														aQZ vs CBS								aTZ/CBS
														Components	RMSE	0.198355	0.191583	0.166257	0.453598	0.444388	0.389112		RMSE	1.14687	1.09814	0.829368	1.55477	1.49686	1.19672
															ME	-0.0386827	-0.0349016	-0.0275216	0.0281295	0.0465036	0.0831142		ME	-0.738602	-0.673	-0.408357	-0.544548	-0.447899	-0.131481
															MAX	1.42857	1.42857	1.42857	2.76382	2.76382	2.76382		MAX	6.85714	6.85714	6.85714	9.54774	9.54774	9.54774
																		HF			MP2					HF			MP2
														Net	RMSE			0.19			0.43		RMSE			1.03			1.42
															ME			-0.03			0.05		ME			-0.61			-0.37
															MAX			1.43			2.76		MAX			6.86			9.55

## Sheet: Extrapolation Check
Actual a5Z	HF-XX	HF-YY	HF-ZZ	MP2-XX	MP2-YY	MP2-ZZ	CCSD-XX	CCSD-YY	CCSD-ZZ	CCSD(T)-XX	CCSD(T)-YY	CCSD(T)-ZZ		Extrapolated a5Z	HF-XX	HF-YY	HF-ZZ	MP2-XX	MP2-YY	MP2-ZZ	CCSD-XX	CCSD-YY	CCSD-ZZ	CCSD(T)-XX	CCSD(T)-YY	CCSD(T)-ZZ		aQZ	Spin Polarization	HF-XX	HF-YY	HF-ZZ	MP2-XX	MP2-YY	MP2-ZZ	CCSD-XX	CCSD-YY	CCSD-ZZ	CCSD(T)-XX	CCSD(T)-YY	CCSD(T)-ZZ			aTZ	Spin Polarization	HF-XX	HF-YY	HF-ZZ	MP2-XX
AlF	6.511	6.511	5.101	6.06	6.06	5.249	6.001	6.001	5.068	5.983	5.983	5.144			6.511	6.511	5.101	6.059	6.059	5.249	6	6	5.068	5.983	5.983	5.144		AlF	NSP	6.508	6.508	5.1	6.067	6.067	5.259	6.006	6.006	5.078	5.991	5.991	5.154			AlF	NSP	6.479	6.479	5.08	6.07
Ar	1.589	1.589	1.589	1.639	1.639	1.639	1.62	1.62	1.62	1.635	1.635	1.635			1.589	1.589	1.589	1.641	1.641	1.641	1.617	1.617	1.617	1.634	1.634	1.634		Ar	NSP	1.593	1.593	1.593	1.644	1.644	1.644	1.625	1.625	1.625	1.64	1.64	1.64			Ar	NSP	1.556	1.556	1.556	1.605
Be	6.658	6.658	6.658	7.146	7.146	7.146	5.661	5.661	5.661	5.63	5.63	5.63			6.658	6.658	6.658	7.132	7.132	7.132	5.665	5.665	5.665	5.632	5.632	5.632		Be	SP	6.644	6.644	6.644	7.112	7.112	7.112	5.654	5.654	5.654	5.624	5.624	5.624			Be	SP	6.624	6.624	6.624	7.074
BeH	5.434	5.434	3.727	5.432	5.432	3.772	5.397	5.397	3.818	5.395	5.395	3.828			5.434	5.434	3.727	5.43	5.43	3.77	5.395	5.395	3.815	5.393	5.393	3.825		BeH	SP	5.424	5.424	3.72	5.421	5.421	3.768	5.387	5.387	3.814	5.385	5.385	3.824			BeH	SP	5.405	5.405	3.708	5.406
BF	3.07	3.07	2.478	3.072	3.072	2.717	2.94	2.94	2.629	2.952	2.952	2.691			3.07	3.07	2.478	3.071	3.071	2.717	2.94	2.94	2.629	2.953	2.953	2.691		BF	NSP	3.068	3.068	2.478	3.07	3.07	2.721	2.939	2.939	2.634	2.952	2.952	2.696			BF	NSP	3.058	3.058	2.481	3.063
BH2	2.774	2.908	2.836	2.838	2.993	2.894	2.824	3	2.901	2.833	3.021	2.917			2.774	2.908	2.836	2.838	2.992	2.895	2.825	2.998	2.902	2.834	3.019	2.917		BH2	SP	2.773	2.909	2.834	2.837	2.996	2.895	2.824	3.003	2.903	2.833	3.024	2.918			BH2	SP	2.773	2.91	2.834	2.836
BH3	2.676	2.676	2.046	2.723	2.723	2.089	2.718	2.718	2.09	2.731	2.731	2.1			2.676	2.676	2.046	2.723	2.723	2.09	2.717	2.717	2.091	2.73	2.73	2.101		BH3	NSP	2.677	2.677	2.046	2.725	2.725	2.09	2.72	2.72	2.091	2.733	2.733	2.101			BH3	NSP	2.677	2.677	2.048	2.729
C2H	2.67	2.67	3.796	3.179	3.179	4.273	2.935	2.935	3.848	3.024	3.024	3.875			2.67	2.67	3.796	3.18	3.18	4.273	2.934	2.934	3.849	3.024	3.024	3.875		C2H	SP	2.67	2.67	3.796	3.177	3.177	4.272	2.939	2.939	3.851	3.028	3.028	3.879			C2H	SP	2.662	2.662	3.794	3.16
CH2-t	1.955	2.21	1.893	2.106	2.291	2.012	2.082	2.282	2	2.107	2.302	2.022			1.955	2.21	1.893	2.107	2.292	2.012	2.083	2.282	2	2.109	2.302	2.022		CH2-t	SP	1.957	2.208	1.893	2.108	2.29	2.011	2.085	2.281	2	2.11	2.301	2.021			CH2-t	SP	1.951	2.201	1.885	2.1
ClF	2.242	2.242	3.307	2.373	2.373	3.318	2.323	2.323	3.32	2.357	2.357	3.339			2.242	2.242	3.307	2.377	2.377	3.322	2.324	2.324	3.322	2.357	2.357	3.342		ClF	NSP	2.241	2.241	3.308	2.373	2.373	3.32	2.325	2.325	3.323	2.357	2.357	3.342			ClF	NSP	2.204	2.204	3.285	2.328
CO	1.671	1.671	2.145	1.766	1.766	2.304	1.731	1.731	2.267	1.754	1.754	2.285			1.671	1.671	2.145	1.766	1.766	2.304	1.73	1.73	2.267	1.753	1.753	2.284		CO	NSP	1.671	1.671	2.147	1.767	1.767	2.308	1.732	1.732	2.272	1.755	1.755	2.289			CO	NSP	1.665	1.665	2.148	1.764
CS	3.548	3.548	5.494	3.487	3.487	5.566	3.496	3.496	5.609	3.511	3.511	5.618			3.548	3.548	5.494	3.485	3.485	5.57	3.493	3.493	5.612	3.509	3.509	5.622		CS	NSP	3.55	3.55	5.495	3.493	3.493	5.576	3.501	3.501	5.62	3.517	3.517	5.629			CS	NSP	3.536	3.536	5.49	3.496
H	0.667	0.667	0.667	0.667	0.667	0.667	0.667	0.667	0.667	0.667	0.667	0.667			0.667	0.667	0.667	0.667	0.667	0.667	0.667	0.667	0.667	0.667	0.667	0.667		H	NSP	0.667	0.667	0.667	0.667	0.667	0.667	0.667	0.667	0.667	0.667	0.667	0.667			H	NSP	0.664	0.664	0.664	0.664
H2	0.683	0.683	0.958	0.679	0.679	0.952	0.678	0.678	0.949	0.678	0.678	0.949			0.683	0.683	0.958	0.679	0.679	0.954	0.678	0.678	0.95	0.678	0.678	0.95		H2	NSP	0.685	0.685	0.957	0.681	0.681	0.953	0.68	0.68	0.949	0.68	0.68	0.949			H2	NSP	0.687	0.687	0.957	0.684
H2O	1.169	1.362	1.263	1.398	1.472	1.43	1.321	1.437	1.374	1.362	1.462	1.406			1.169	1.362	1.263	1.397	1.473	1.43	1.321	1.438	1.373	1.362	1.462	1.406		H2O	NSP	1.164	1.362	1.259	1.39	1.474	1.425	1.317	1.44	1.37	1.357	1.464	1.402			H2O	NSP	1.146	1.359	1.244	1.365
HBO	1.991	1.991	2.887	2.145	2.145	3.25	2.074	2.074	3.118	2.104	2.104	3.175			1.991	1.991	2.887	2.146	2.146	3.252	2.075	2.075	3.118	2.105	2.105	3.175		HBO	NSP	1.988	1.988	2.888	2.145	2.145	3.255	2.075	2.075	3.124	2.105	2.105	3.18			HBO	NSP	1.979	1.979	2.885	2.141
HCl	2.393	2.393	2.661	2.481	2.481	2.722	2.435	2.435	2.69	2.462	2.462	2.712			2.393	2.393	2.661	2.485	2.485	2.722	2.434	2.434	2.688	2.462	2.462	2.711		HCl	NSP	2.398	2.398	2.659	2.49	2.49	2.722	2.444	2.444	2.691	2.471	2.471	2.713			HCl	NSP	2.353	2.353	2.633	2.444
HCN	2.066	2.066	3.343	2.059	2.059	3.24	2.04	2.04	3.265	2.063	2.063	3.299			2.066	2.066	3.343	2.058	2.058	3.242	2.038	2.038	3.266	2.062	2.062	3.3		HCN	NSP	2.067	2.067	3.342	2.062	2.062	3.243	2.042	2.042	3.268	2.066	2.066	3.302			HCN	NSP	2.058	2.058	3.342	2.061
He	0.196	0.196	0.196	0.202	0.202	0.202	0.205	0.205	0.205	0.205	0.205	0.205			0.196	0.196	0.196	0.202	0.202	0.202	0.205	0.205	0.205	0.205	0.205	0.205		He	NSP	0.196	0.196	0.196	0.202	0.202	0.202	0.205	0.205	0.205	0.205	0.205	0.205			He	NSP	0.195	0.195	0.195	0.201
HF	0.661	0.661	0.852	0.774	0.774	0.939	0.739	0.739	0.917	0.759	0.759	0.934			0.661	0.661	0.852	0.774	0.774	0.94	0.739	0.739	0.918	0.758	0.758	0.935		HF	NSP	0.656	0.656	0.851	0.765	0.765	0.939	0.733	0.733	0.918	0.751	0.751	0.935			HF	NSP	0.633	0.633	0.847	0.732
HNC	2.229	2.229	3.309	2.324	2.324	3.465	2.283	2.283	3.448	2.314	2.314	3.48			2.229	2.229	3.309	2.324	2.324	3.466	2.283	2.283	3.448	2.313	2.313	3.48		HNC	NSP	2.228	2.228	3.309	2.325	2.325	3.469	2.285	2.285	3.453	2.315	2.315	3.485			HNC	NSP	2.215	2.215	3.309	2.318
Li	25.208	25.208	25.208	24.474	24.474	24.474	24.382	24.382	24.382	24.362	24.362	24.362			25.208	25.208	25.208	24.491	24.491	24.491	24.386	24.386	24.386	24.367	24.367	24.367		Li	SP	25.365	25.365	25.365	24.689	24.689	24.689	24.591	24.591	24.591	24.574	24.574	24.574			Li	SP	25.091	25.091	25.091	24.529
N	1.063	1.063	1.063	1.06	1.06	1.06	1.067	1.067	1.067	1.076	1.076	1.076			1.063	1.063	1.063	1.06	1.06	1.06	1.068	1.068	1.068	1.076	1.076	1.076		N	SP	1.064	1.064	1.064	1.061	1.061	1.061	1.068	1.068	1.068	1.076	1.076	1.076			N	SP	1.057	1.057	1.057	1.053
N2	1.458	1.458	2.228	1.495	1.495	2.112	1.489	1.489	2.167	1.508	1.508	2.187			1.458	1.458	2.228	1.495	1.495	2.114	1.489	1.489	2.169	1.508	1.508	2.188		N2	NSP	1.458	1.458	2.228	1.497	1.497	2.115	1.491	1.491	2.17	1.51	1.51	2.19			N2	NSP	1.452	1.452	2.228	1.496
Ne	0.35	0.35	0.35	0.396	0.396	0.396	0.384	0.384	0.384	0.391	0.391	0.391			0.35	0.35	0.35	0.395	0.395	0.395	0.383	0.383	0.383	0.391	0.391	0.391		Ne	NSP	0.345	0.345	0.345	0.387	0.387	0.387	0.377	0.377	0.377	0.384	0.384	0.384			Ne	NSP	0.326	0.326	0.326	0.36
NH	1.257	1.257	1.604	1.326	1.326	1.677	1.313	1.313	1.676	1.329	1.329	1.699			1.257	1.257	1.604	1.327	1.327	1.676	1.315	1.315	1.675	1.331	1.331	1.699		NH	SP	1.255	1.255	1.603	1.324	1.324	1.677	1.312	1.312	1.677	1.327	1.327	1.7			NH	SP	1.245	1.245	1.596	1.31
NH2	1.452	1.774	1.749	1.582	1.857	1.918	1.549	1.84	1.881	1.572	1.863	1.921			1.452	1.774	1.749	1.582	1.858	1.92	1.549	1.839	1.882	1.571	1.863	1.923		NH2	SP	1.449	1.775	1.745	1.577	1.86	1.916	1.545	1.842	1.88	1.567	1.866	1.92			NH2	SP	1.432	1.772	1.732	1.555
NO	1.362	1.362	2.269	1.468	1.468	0.526	1.46	1.46	2.205	1.489	1.489	2.194			1.362	1.362	2.269	1.47	1.47	0.525	1.461	1.461	2.204	1.49	1.49	2.193		NO	SP	1.36	1.36	2.267	1.466	1.466	0.534	1.46	1.46	2.206	1.488	1.488	2.193			NO	SP	1.345	1.345	2.258	1.445
O2	1.157	1.157	2.685	1.171	1.171	1.8	1.195	1.195	2.284	1.211	1.211	2.264			1.157	1.157	2.685	1.172	1.172	1.801	1.196	1.196	2.285	1.212	1.212	2.264		O2	SP	1.155	1.155	2.684	1.172	1.172	1.801	1.195	1.195	2.284	1.21	1.21	2.264			O2	SP	1.132	1.132	2.677	1.154
OCl	2.388	2.388	3.726	2.433	2.433	4.318	2.399	2.399	4.115	2.419	2.419	4.175			2.388	2.388	3.726	2.436	2.436	4.323	2.398	2.398	4.116	2.417	2.417	4.177		OCl	SP	2.387	2.387	3.726	2.433	2.433	4.322	2.398	2.398	4.119	2.416	2.416	4.179			OCl	SP	2.351	2.351	3.703	2.391
OF	0.983	0.983	1.951	1.094	1.094	1.834	1.07	1.07	2.006	1.091	1.091	2.033			0.983	0.983	1.951	1.095	1.095	1.834	1.07	1.07	2.006	1.092	1.092	2.033		OF	SP	0.982	0.982	1.948	1.09	1.09	1.831	1.067	1.067	2.004	1.087	1.087	2.03			OF	SP	0.961	0.961	1.934	1.057
OH	0.966	0.966	1.164	1.109	1.109	1.25	1.08	1.08	1.238	1.109	1.109	1.259			0.966	0.966	1.164	1.11	1.11	1.25	1.08	1.08	1.237	1.109	1.109	1.259		OH	SP	0.962	0.962	1.163	1.103	1.103	1.25	1.076	1.076	1.238	1.104	1.104	1.259			OH	SP	0.939	0.939	1.156	1.072
P	3.783	3.783	3.783	3.689	3.689	3.689	3.697	3.697	3.697	3.709	3.709	3.709			3.783	3.783	3.783	3.693	3.693	3.693	3.702	3.702	3.702	3.714	3.714	3.714		P	SP	3.784	3.784	3.784	3.695	3.695	3.695	3.702	3.702	3.702	3.714	3.714	3.714			P	SP	3.777	3.777	3.777	3.691
PH	3.916	3.916	4.327	3.932	3.932	4.392	3.892	3.892	4.344	3.91	3.91	4.369			3.916	3.916	4.327	3.936	3.936	4.396	3.896	3.896	4.347	3.914	3.914	4.372		PH	SP	3.917	3.917	4.327	3.937	3.937	4.398	3.897	3.897	4.349	3.915	3.915	4.374			PH	SP	3.909	3.909	4.312	3.929
PH2	4.067	4.385	4.429	4.112	4.442	4.534	4.063	4.392	4.467	4.085	4.414	4.502			4.067	4.385	4.429	4.116	4.445	4.539	4.065	4.393	4.47	4.087	4.416	4.506		PH2	SP	4.068	4.385	4.429	4.118	4.446	4.541	4.068	4.395	4.473	4.09	4.417	4.508			PH2	SP	4.061	4.378	4.413	4.115
SF	3.062	3.062	3.364	3.209	3.209	3.607	3.149	3.149	3.544	3.199	3.199	3.608			3.062	3.062	3.364	3.217	3.217	3.611	3.151	3.151	3.546	3.203	3.203	3.61		SF	SP	3.061	3.061	3.368	3.217	3.217	3.615	3.157	3.157	3.553	3.207	3.207	3.616			SF	SP	3.019	3.019	3.348	3.178
SH	3.377	3.377	3.41	3.467	3.467	3.471	3.41	3.41	3.43	3.448	3.448	3.455			3.377	3.377	3.41	3.474	3.474	3.474	3.41	3.41	3.431	3.449	3.449	3.457		SH	SP	3.383	3.383	3.409	3.484	3.484	3.475	3.426	3.426	3.434	3.464	3.464	3.46			SH	SP	3.345	3.345	3.379	3.458
SH2	3.568	3.545	3.499	3.692	3.6	3.593	3.604	3.551	3.532	3.646	3.575	3.563			3.568	3.545	3.499	3.697	3.604	3.597	3.603	3.552	3.533	3.648	3.577	3.564		SH2	NSP	3.574	3.544	3.498	3.708	3.604	3.597	3.619	3.555	3.536	3.663	3.579	3.567			SH2	NSP	3.538	3.516	3.467	3.685
														Difference between Actual and Extrapolation
													Components	RMSE				0.104024	0.103042	0.0962696	0.0765668	0.0777263	0.0771417	0.0635886	0.0614539	0.0535655
														ME				0.0376598	0.0403444	0.0308577	0.00232732	-0.000446749	0.0102547	0.0141042	0.0105419	0.0229781
														MAX				0.252525	0.252525	0.252525	0.260417	0.260417	0.260417	0.150489	0.150489	0.134807
																				MP2			CCSD			CCSD(T)
													Net	RMSE						0.1			0.08			0.06
														ME						0.04			0			0.02
														MAX						0.25			0.26			0.15
[truncated: 8 more columns]

## Sheet: XYG3 Extrapolate 
a5Z					a5Z/a4Z convergence		aQZ								aTZ
AlF	6.204	6.204	4.939		0.0288093		AlF	6.202	6.202	4.938	6.079	6.079	5.25		AlF	6.179	6.179	4.923	6.069	6.069	5.249		6.072	6.072	5.241
Ar	1.58	1.58	1.58		0.189514		Ar	1.583	1.583	1.583	1.63	1.63	1.63		Ar	1.547	1.547	1.547	1.588	1.588	1.588		1.631	1.631	1.631
BeH2	2.764	2.764	2.87		0.116825		BeH2	2.762	2.762	2.865	2.834	2.834	2.936		BeH2	2.76	2.76	2.876	2.833	2.833	2.95		2.835	2.835	2.939
BF	3	3	2.451		0.0593408		BF	2.998	2.998	2.452	3.04	3.04	2.698		BF	2.988	2.988	2.454	3.03	3.03	2.704		3.042	3.042	2.694
BH2Cl	3.454	3.921	5.123		0.0147208		BH2Cl	3.454	3.922	5.123	3.536	4.038	5.481		BH2Cl	3.436	3.903	5.117	3.519	4.022	5.479		3.535	4.035	5.478
BH2F	1.968	2.511	2.373		0.0445204		BH2F	1.967	2.51	2.374	2.068	2.639	2.629		BH2F	1.959	2.502	2.375	2.059	2.632	2.633		2.07	2.639	2.626
BH3	2.658	2.658	2.037		0		BH3	2.658	2.658	2.037	2.714	2.714	2.079		BH3	2.659	2.659	2.04	2.717	2.717	2.082		2.713	2.713	2.079
BHF2	1.878	2.276	2.253		0.0958676		BHF2	1.875	2.276	2.252	2.037	2.613	2.508		BHF2	1.861	2.273	2.243	2.021	2.612	2.501		2.041	2.612	2.508
C2H2	2.821	2.821	4.611		0.0579281		C2H2	2.819	2.819	4.611	2.773	2.773	4.534		C2H2	2.804	2.804	4.609	2.763	2.763	4.536		2.771	2.771	4.531
C2H4	3.343	3.64	5.33		0.0823152		C2H4	3.343	3.635	5.332	3.324	3.732	5.224		C2H4	3.334	3.619	5.334	3.32	3.72	5.229		3.32	3.734	5.22
CH2BH	4.227	3.547	5.806		0.0366929		CH2BH	4.228	3.545	5.805	4.197	3.639	5.852		CH2BH	4.225	3.535	5.802	4.203	3.634	5.854		4.189	3.637	5.849
CH3BH2	3.582	4.54	4.127		0.0127142		CH3BH2	3.582	4.541	4.127	3.69	4.848	4.245		CH3BH2	3.583	4.542	4.127	3.693	4.853	4.248		3.689	4.844	4.243
CH3Cl	3.802	3.802	5.267		0.04435		CH3Cl	3.8	3.8	5.266	3.933	3.933	5.409		CH3Cl	3.767	3.767	5.25	3.895	3.895	5.394		3.939	3.939	5.409
CH3F	2.246	2.246	2.375		0.0485781		CH3F	2.246	2.246	2.377	2.374	2.374	2.571		CH3F	2.239	2.239	2.376	2.364	2.364	2.571		2.376	2.376	2.568
CH3NH2	3.846	3.317	3.365		0.0487788		CH3NH2	3.848	3.318	3.367	4.129	3.616	3.525		CH3NH2	3.848	3.319	3.367	4.129	3.614	3.525		4.127	3.617	3.523
CH3OH	2.847	3.153	2.703		0.0365991		CH3OH	2.847	3.155	2.703	3.012	3.425	2.926		CH3OH	2.846	3.155	2.699	3.011	3.424	2.917		3.012	3.424	2.93
CH3SH	6.137	4.848	4.807		0.048916		CH3SH	6.136	4.848	4.811	6.316	4.994	4.988		CH3SH	6.122	4.828	4.788	6.302	4.973	4.964		6.317	4.995	4.985
CH4	2.356	2.356	2.356		0.0424268		CH4	2.357	2.357	2.357	2.433	2.433	2.433		CH4	2.357	2.357	2.357	2.434	2.434	2.434		2.431	2.431	2.431
Cl2	3.517	3.517	6.144		0.185542		Cl2	3.525	3.525	6.143	3.671	3.671	6.204		Cl2	3.482	3.482	6.099	3.613	3.613	6.144		3.674	3.674	6.217
ClCN	3.3	3.3	6.376		0.0526683		ClCN	3.302	3.302	6.374	3.389	3.389	6.718		ClCN	3.282	3.282	6.365	3.367	3.367	6.709		3.388	3.388	6.72
ClF	2.221	2.221	3.258		0.0408233		ClF	2.22	2.22	3.259	2.35	2.35	3.35		ClF	2.186	2.186	3.237	2.301	2.301	3.316		2.362	2.362	3.358
CO	1.656	1.656	2.136		0.0270169		CO	1.656	1.656	2.137	1.756	1.756	2.273		CO	1.649	1.649	2.137	1.75	1.75	2.274		1.755	1.755	2.271
CO2	1.771	1.771	3.575		0.139484		CO2	1.768	1.768	3.574	1.895	1.895	3.97		CO2	1.748	1.748	3.573	1.873	1.873	3.968		1.899	1.899	3.972
CS	3.489	3.489	5.376		0.0479938		CS	3.491	3.491	5.377	3.508	3.508	5.59		CS	3.478	3.478	5.373	3.503	3.503	5.588		3.5	3.5	5.588
CSO	3.72	3.72	7.323		0.066264		CSO	3.723	3.723	7.324	3.778	3.778	7.779		CSO	3.699	3.699	7.316	3.756	3.756	7.775		3.774	3.774	7.775
FCN	2.098	2.098	3.499		0.0389364		FCN	2.097	2.097	3.499	2.163	2.163	3.754		FCN	2.081	2.081	3.496	2.148	2.148	3.752		2.163	2.163	3.753
FNO	3.137	2.223	1.592		0.158773		FNO	3.135	2.221	1.588	3.539	2.509	1.753		FNO	3.122	2.207	1.566	3.52	2.491	1.722		3.545	2.514	1.764
H	0.674	0.674	0.674		0.148148		H	0.675	0.675	0.675	0.675	0.675	0.675		H	0.673	0.673	0.673	0.673	0.673	0.673		0.674	0.674	0.674
H2	0.681	0.681	0.952		0		H2	0.681	0.681	0.952	0.683	0.683	0.955		H2	0.685	0.685	0.951	0.687	0.687	0.955		0.683	0.683	0.954
H2O	1.133	1.346	1.243		0.21176		H2O	1.13	1.347	1.24	1.365	1.473	1.414		H2O	1.115	1.346	1.227	1.338	1.471	1.393		1.377	1.473	1.423
HBO	1.983	1.983	2.906		0.123712		HBO	1.98	1.98	2.906	2.118	2.118	3.228		HBO	1.971	1.971	2.903	2.112	2.112	3.227		2.119	2.119	3.227
HBS	4.254	4.254	6.505		0.0422787		HBS	4.256	4.256	6.503	4.21	4.21	6.671		HBS	4.242	4.242	6.498	4.204	4.204	6.673		4.202	4.202	6.668
HCCCl	3.95	3.95	8.085		0.0218649		HCCCl	3.951	3.951	8.084	3.991	3.991	8.237		HCCCl	3.923	3.923	8.074	3.963	3.963	8.232		3.99	3.99	8.234
HCCF	2.746	2.746	4.651		0.0322302		HCCF	2.745	2.745	4.652	2.76	2.76	4.823		HCCF	2.729	2.729	4.648	2.747	2.747	4.822		2.759	2.759	4.82
HCHO	1.849	2.405	3.101		0.0363658		HCHO	1.848	2.405	3.102	1.92	2.678	3.349		HCHO	1.835	2.396	3.102	1.905	2.666	3.347		1.922	2.68	3.349
HCl	2.368	2.368	2.643		0.173421		HCl	2.373	2.373	2.642	2.459	2.459	2.711		HCl	2.33	2.33	2.618	2.408	2.408	2.685		2.46	2.46	2.713
HCN	2.038	2.038	3.282		0.0533185		HCN	2.039	2.039	3.28	2.064	2.064	3.307		HCN	2.031	2.031	3.279	2.059	2.059	3.309		2.061	2.061	3.307
HCONH2	4.47	3.576	2.729		0.0648383		HCONH2	4.469	3.576	2.726	5.246	4.138	2.964		HCONH2	4.466	3.562	2.713	5.243	4.123	2.946		5.247	4.139	2.971
HCOOH	3.542	3.096	2.212		0.08223		HCOOH	3.541	3.095	2.209	4.045	3.575	2.407		HCOOH	3.535	3.085	2.192	4.039	3.566	2.385		4.046	3.575	2.414
He	0.196	0.196	0.196		0.507614		He	0.197	0.197	0.197	0.202	0.202	0.202		He	0.196	0.196	0.196	0.201	0.201	0.201		0.201	0.201	0.201
HF	0.651	0.651	0.844		0.635664		HF	0.646	0.646	0.843	0.751	0.751	0.936		HF	0.624	0.624	0.839	0.718	0.718	0.932		0.764	0.764	0.937
HNC	2.202	2.202	3.241		0.0370966		HNC	2.201	2.201	3.241	2.308	2.308	3.463		HNC	2.188	2.188	3.24	2.298	2.298	3.465		2.307	2.307	3.461
HOCl	2.769	2.593	4.153		0.0625285		HOCl	2.771	2.595	4.152	2.939	2.799	4.242		HOCl	2.738	2.561	4.127	2.898	2.752	4.204		2.943	2.806	4.252
HOOH	1.792	2.847	1.582		0.0609019		HOOH	1.792	2.844	1.582	2.023	2.84	1.867		HOOH	1.784	2.831	1.569	2.008	2.821	1.843		2.028	2.847	1.875
LiBH4	4.066	4.066	4.334		0.0803618		LiBH4	4.069	4.069	4.338	4.251	4.251	4.619		LiBH4	4.071	4.071	4.34	4.256	4.256	4.624		4.246	4.246	4.613
LiCl	3.431	3.431	3.526		0.286574		LiCl	3.419	3.419	3.526	3.773	3.773	4.031		LiCl	3.378	3.378	3.525	3.737	3.737	4.044		3.781	3.781	4.021
LiCN	3.159	3.505	2.852		0.047349		LiCN	3.16	3.506	2.854	3.74	3.852	3.145		LiCN	3.157	3.505	2.848	3.745	3.857	3.144		3.733	3.847	3.139
LiH	3.551	3.551	2.949		0.0631273		LiH	3.552	3.552	2.946	4.059	4.059	3.63		LiH	3.555	3.555	2.942	4.069	4.069	3.649		4.053	4.053	3.616
Mg	11.32	11.32	11.32		0.0265088		Mg	11.317	11.317	11.317	10.705	10.705	10.705		Mg	11.315	11.315	11.315	10.738	10.738	10.738		10.682	10.682	10.682
Mg2	19.378	19.378	34.041		0.0574178		Mg2	19.366	19.366	34.025	18.518	18.518	32.606		Mg2	19.369	19.369	34.008	18.559	18.559	32.692		18.502	18.502	32.547
N2	1.443	1.443	2.183		0		N2	1.443	1.443	2.183	1.502	1.502	2.164		N2	1.436	1.436	2.181	1.498	1.498	2.164		1.5	1.5	2.163
N2H4	2.885	3.47	2.791		0.0480001		N2H4	2.887	3.471	2.792	3.134	3.751	3.163		N2H4	2.889	3.468	2.793	3.135	3.743	3.161		3.133	3.754	3.164
NaCl	3.706	3.706	3.692		0.898949		NaCl	3.712	3.712	3.636	4.222	4.222	4.993		NaCl	3.641	3.641	3.604	4.155	4.155	5.004		4.213	4.213	5.018
NaCN	3.824	3.237	3.078		0.173764		NaCN	3.819	3.23	3.073	4.458	4.121	3.476		NaCN	3.805	3.206	3.056	4.454	4.108	3.465		4.456	4.12	3.477
NaH	4.607	4.607	5.615		0.0531343		NaH	4.61	4.61	5.615	5.393	5.393	8.132		NaH	4.606	4.606	5.634	5.41	5.41	8.193		5.375	5.375	8.101
Ne	0.349	0.349	0.349		1.15942		Ne	0.345	0.345	0.345	0.38	0.38	0.38		Ne	0.326	0.326	0.326	0.353	0.353	0.353		0.39	0.39	0.39
NH2Cl	3.241	3.241	4.921		0.526628		NH2Cl	3.245	3.212	4.919	3.437	3.432	5.04		NH2Cl	3.21	3.176	4.897	3.394	3.388	5.009		3.439	3.467	5.049
NH2F	1.877	2.286	1.865		0.0909539		NH2F	1.875	2.285	1.863	2.088	2.42	2.058		NH2F	1.86	2.275	1.849	2.065	2.405	2.036		2.096	2.425	2.066
NH2OH	2.349	3.097	2.227		0		NH2OH	2.349	3.097	2.227	2.661	3.276	2.488		NH2OH	2.346	3.092	2.22	2.654	3.268	2.473		2.664	3.278	2.494
NH3	1.873	1.873	1.901		0.0531195		NH3	1.874	1.874	1.9	2.011	2.011	2.245		NH3	1.873	1.873	1.891	2.006	2.006	2.225		2.013	2.013	2.254
NH3O	2.242	2.242	2.929		0.322469		NH3O	2.235	2.235	2.939	2.683	2.683	3.873		NH3O	2.195	2.195	2.951	2.602	2.602	3.865		2.72	2.72	3.878
OCl2	3.967	7.255	4.434		0.0771984		OCl2	3.972	7.255	4.436	4.212	7.812	4.64		OCl2	3.927	7.227	4.394	4.146	7.768	4.581		4.222	7.824	4.65
P2H4	7.253	10.441	7.255		0.0209494		P2H4	7.254	10.439	7.257	7.406	10.732	7.431		P2H4	7.248	10.436	7.25	7.402	10.733	7.426		7.404	10.731	7.428
PH2OH	4.687	4.62	4.67		0		PH2OH	4.687	4.62	4.67	4.891	4.987	4.873		PH2OH	4.679	4.621	4.662	4.883	4.987	4.865		4.891	4.988	4.873
PH3	4.346	4.346	4.498		0.02566		PH3	4.346	4.346	4.5	4.413	4.413	4.624		PH3	4.346	4.346	4.491	4.414	4.414	4.615		4.412	4.412	4.622
PH3O	3.83	3.83	4.383		0.0501321		PH3O	3.828	3.828	4.385	4.115	4.115	5.02		PH3O	3.823	3.823	4.397	4.11	4.11	5.034		4.117	4.117	5.017
S2H2	5.476	8.07	5.446		0.0709263		S2H2	5.481	8.067	5.45	5.675	8.32	5.644		S2H2	5.449	8.038	5.418	5.638	8.284	5.608		5.674	8.328	5.643
SCl2	5.328	9.544	6.829		0.0988175		SCl2	5.337	9.544	6.831	5.596	10.148	7.062		SCl2	5.29	9.504	6.78	5.533	10.089	6.997		5.599	10.162	7.07
SF2	2.936	3.516	3.196		0.0711606		SF2	2.933	3.517	3.194	3.166	3.849	3.469		SF2	2.897	3.498	3.17	3.114	3.819	3.434		3.181	3.856	3.479
SH2	3.504	3.516	3.474		0.116273		SH2	3.511	3.517	3.474	3.645	3.586	3.567		SH2	3.479	3.492	3.447	3.611	3.56	3.537		3.639	3.586	3.569
SiH3Cl	5.44	5.44	6.748		0.0227635		SiH3Cl	5.441	5.441	6.746	5.624	5.624	7.109		SiH3Cl	5.425	5.425	6.754	5.608	5.608	7.117		5.623	5.623	7.111
SiH3F	4.006	4.006	3.58		0.0203869		SiH3F	4.005	4.005	3.58	4.193	4.193	3.863		SiH3F	4.003	4.003	3.59	4.19	4.19	3.875		4.195	4.195	3.862
SiH4	4.4	4.4	4.4		0		SiH4	4.4	4.4	4.4	4.535	4.535	4.535		SiH4	4.41	4.41	4.41	4.545	4.545	4.545		4.535	4.535	4.535
SiO	3.916	3.916	4.492		0.0676668		SiO	3.913	3.913	4.494	4.128	4.128	5.377		SiO	3.9	3.9	4.496	4.123	4.123	5.378		4.125	4.125	5.376
SO2	2.74	4.645	3.066		0.122297		SO2	2.735	4.643	3.063	2.912	5.081	3.447		SO2	2.701	4.639	3.046	2.874	5.077	3.429		2.92	5.083	3.451
Be	6.589	6.589	6.589		0.24342		Be	6.573	6.573	6.573	6.176	6.176	6.176		Be	6.553	6.553	6.553	6.164	6.164	6.164		6.186	6.186	6.186
BeH	5.329	5.329	3.678		0.108535		BeH	5.322	5.322	3.677	5.335	5.335	3.778		BeH	5.303	5.303	3.665	5.316	5.316	3.771		5.342	5.342	3.775
BH2	2.761	2.822	2.812		0.050306		BH2	2.762	2.824	2.811	2.815	2.947	2.885		BH2	2.765	2.833	2.812	2.815	2.956	2.889		2.816	2.945	2.884
BN	2.986	2.986	3.383		0.0273533		BN	2.985	2.985	3.383	3.113	3.113	4.542		BN	2.979	2.979	3.382	3.114	3.114	4.545		3.109	3.109	4.539
BO	2.117	2.117	2.464		0.11587		BO	2.114	2.114	2.464	2.309	2.309	2.988		BO	2.105	2.105	2.463	2.302	2.302	2.988		2.311	2.311	2.987
BS	4.358	4.358	6.105		0.0419616		BS	4.36	4.36	6.103	4.38	4.38	6.478		BS	4.346	4.346	6.1	4.374	4.374	6.483		4.372	4.372	6.474
C2H	1.914	1.914	2.123		0.682477		C2H	1.908	1.908	2.1	3.338	3.338	3.287		C2H	1.889	1.889	2.07	3.34	3.34	3.283		3.329	3.329	3.291
C2H3	3.273	5.017	3.184		0.0605268		C2H3	3.27	5.019	3.185	3.457	5.107	3.189		C2H3	3.256	5.021	3.177	3.443	5.111	3.183		3.46	5.104	3.187
CH2F	1.946	2.281	2.157		0.0823949		CH2F	1.948	2.283	2.156	2.197	2.556	2.316		CH2F	1.939	2.279	2.147	2.178	2.545	2.302		2.202	2.559	2.321
CH2NH	3.031	2.481	4.188		0.0232615		CH2NH	3.031	2.482	4.188	3.237	2.542	4.306		CH2NH	3.025	2.474	4.19	3.233	2.533	4.308		3.236	2.542	4.306
CH2PH	7.824	5.052	5.577		0.0317215		CH2PH	7.825	5.05	5.575	7.635	4.974	5.673		CH2PH	7.825	5.034	5.558	7.637	4.966	5.662		7.633	4.97	5.671
CH2-t	1.953	2.213	1.879		0.161822		CH2-t	1.958	2.212	1.881	2.092	2.3	1.999		CH2-t	1.957	2.209	1.877	2.085	2.293	1.988		2.091	2.304	2.002
CH3O	3.441	2.597	2.84		0.0463103		CH3O	3.441	2.598	2.842	4.21	2.775	3.396		CH3O	3.425	2.594	2.844	4.188	2.763	3.395		4.214	2.78	3.396
F2	0.816	0.816	2.02		0.0858726		F2	0.816	0.816	2.017	0.943	0.943	1.89		F2	0.794	0.794	1.999	0.902	0.902	1.866		0.957	0.957	1.897
FH-OH	1.673	1.398	1.491		0.303549		FH-OH	1.667	1.393	1.489	1.866	1.579	2.128		FH-OH	1.642	1.362	1.482	1.829	1.532	2.12		1.881	1.596	2.131
H2CN	2.194	2.584	3.49		0.0571356		H2CN	2.196	2.583	3.49	2.271	2.791	3.704		H2CN	2.187	2.576	3.492	2.261	2.782	3.705		2.27	2.793	3.705
H2O-Li	39.031	34.575	43.721		0.0728016		H2O-Li	39.005	34.548	43.753	36.388	31.919	44.861		H2O-Li	38.829	34.432	43.873	36.281	31.851	44.947		36.364	31.911	44.854
HCHS	3.938	4.446	6.741		0.0781492		HCHS	3.943	4.448	6.74	3.901	4.583	6.639		HCHS	3.906	4.41	6.73	3.864	4.546	6.631		3.896	4.58	6.639
HCO	2.357	2.857	1.812		0.0755056		HCO	2.357	2.859	1.81	2.652	2.916	1.926		HCO	2.35	2.854	1.799	2.642	2.908	1.91		2.654	2.916	1.932
HCP	4.537	4.537	7.013		0.0395926		HCP	4.535	4.535	7.015	4.437	4.437	6.876		HCP	4.509	4.509	7.017	4.422	4.422	6.881		4.431	4.431	6.872
HNO	1.521	1.964	2.651		0.0924014		HNO	1.519	1.963	2.653	1.588	2.333	2.801		HNO	1.501	1.95	2.652	1.562	2.311	2.793		1.596	2.341	2.804
HNS	5.715	3.783	3.331		0.0641964		HNS	5.714	3.787	3.332	5.685	4.032	3.352		HNS	5.699	3.756	3.297	5.664	3.993	3.31		5.69	4.034	3.356
HO2	1.497	2.576	1.321		0.0891418		HO2	1.499	2.574	1.321	1.732	2.706	1.463		HO2	1.488	2.565	1.306	1.702	2.692	1.43		1.744	2.712	1.476
HOF	1.348	1.136	2.365		0.156679		HOF	1.345	1.135	2.362	1.521	1.347	2.316		HOF	1.329	1.116	2.347	1.494	1.314	2.294		1.532	1.358	2.324
Li	23.099	23.099	23.099		0.134385		Li	23.068	23.068	23.068	22.822	22.822	22.822		Li	23.042	23.042	23.042	22.836	22.836	22.836		22.824	22.824	22.824
Li2	25.106	25.106	35.452		0.253824		Li2	25.051	25.051	35.342	24.354	24.354	39.026		Li2	25.025	25.025	35.375	24.354	24.354	39.139		24.39	24.39	39.078
N	1.032	1.032	1.032		0.193424		N	1.034	1.034	1.034	1.064	1.064	1.064		N	1.03	1.03	1.03	1.055	1.055	1.055		1.066	1.066	1.066
N2H2	3.377	1.997	2.621		0.0363631		N2H2	3.377	1.996	2.62	3.541	2.074	2.9		N2H2	3.375	1.986	2.615	3.537	2.061	2.895		3.542	2.077	2.901
Na	24.279	24.279	24.279		0.0123579		Na	24.276	24.276	24.276	23.121	23.121	23.121		Na	24.221	24.221	24.221	23.24	23.24	23.24		22.997	22.997	22.997
Na2	30.825	30.825	49.913		0.0393015		Na2	30.825	30.825	49.947	29.1	29.1	50.612		Na2	30.796	30.796	49.986	29.196	29.196	50.809		29.009	29.009	50.463
NaLi	27.916	27.916	42.793		0.031561		NaLi	27.918	27.918	42.816	26.735	26.735	45.147		NaLi	27.901	27.901	42.86	26.789	26.789	45.292		26.681	26.681	45.05
NH	1.241	1.241	1.574		0.0985765		NH	1.242	1.242	1.572	1.317	1.317	1.672		NH	1.233	1.233	1.567	1.301	1.301	1.666		1.321	1.321	1.675
NH2	1.44	1.754	1.705		0.110125		NH2	1.438	1.755	1.703	1.562	1.86	1.899		NH2	1.424	1.754	1.693	1.539	1.859	1.882		1.571	1.859	1.906
NO	1.309	1.309	2.159		0.203162		NO	1.312	1.312	2.162	1.479	1.479	2.226		NO	1.303	1.303	2.159	1.458	1.458	2.215		1.485	1.485	2.229
NOCl	4.583	6.668	3.244		0.0829419		NOCl	4.588	6.667	3.247	4.92	7.214	3.367		NOCl	4.544	6.638	3.196	4.867	7.191	3.306		4.922	7.211	3.371
NP	3.513	3.513	5.232		0.0478024		NP	3.511	3.511	5.231	3.574	3.574	5.512		NP	3.496	3.496	5.229	3.565	3.565	5.511		3.572	3.572	5.512
O2	1.098	1.098	2.45		0.0779452		O2	1.099	1.099	2.449	1.202	1.202	2.245		O2	1.085	1.085	2.441	1.174	1.174	2.232		1.211	1.211	2.25
O3	1.647	4.995	1.848		0.126021		O3	1.645	4.991	1.845	1.734	4.415	2.167		O3	1.616	4.972	1.823	1.7	4.402	2.138		1.74	4.415	2.175
OCl	2.353	2.353	4.147		0.104896		OCl	2.356	2.356	4.148	2.519	2.519	4.193		OCl	2.325	2.325	4.127	2.469	2.469	4.16		2.53	2.53	4.201
OF	0.949	0.949	1.856		0.182659		OF	0.951	0.951	1.854	1.123	1.123	2.072		OF	0.933	0.933	1.842	1.087	1.087	2.053		1.134	1.134	2.079
OF2	1.249	2.858	1.88		0.0868819		OF2	1.25	2.856	1.878	1.458	3.067	1.985		OF2	1.23	2.841	1.858	1.42	3.04	1.951		1.47	3.078	1.997
OH	0.932	0.932	1.147		0.182675		OH	0.93	0.93	1.146	1.08	1.08	1.249		OH	0.91	0.91	1.14	1.048	1.048	1.241		1.091	1.091	1.251
P	3.698	3.698	3.698		0.0270343		P	3.699	3.699	3.699	3.701	3.701	3.701		P	3.697	3.697	3.697	3.697	3.697	3.697		3.701	3.701	3.701
PH	3.884	3.884	4.308		0.0249244		PH	3.885	3.885	4.309	3.915	3.915	4.372		PH	3.879	3.879	4.295	3.907	3.907	4.357		3.915	3.915	4.372
PH2	4.041	4.368	4.413		0.0193678		PH2	4.042	4.368	4.414	4.096	4.428	4.506		PH2	4.037	4.362	4.399	4.091	4.421	4.49		4.095	4.429	4.506
S2	4.538	4.538	9.058		0.0907632		S2	4.543	4.543	9.056	4.667	4.667	8.656		S2	4.515	4.515	9.039	4.627	4.627	8.632		4.671	4.671	8.663
SCl	4.175	4.175	6.875		0.136926		SCl	4.182	4.182	6.874	4.399	4.399	7.229		SCl	4.145	4.145	6.839	4.347	4.347	7.182		4.403	4.403	7.239
SF	2.989	2.989	3.332		0.0744247		SF	2.988	2.988	3.336	3.185	3.185	3.65		SF	2.956	2.956	3.319	3.139	3.139	3.625		3.196	3.196	3.652
SH	3.315	3.315	3.388		0.148496		SH	3.321	3.321	3.389	3.43	3.43	3.459		SH	3.289	3.289	3.362	3.395	3.395	3.431		3.426	3.426	3.459
SO-trip	2.771	2.771	4.317		0.118788		SO-trip	2.767	2.767	4.318	2.936	2.936	4.385		SO-trip	2.743	2.743	4.312	2.895	2.895	4.366		2.952	2.952	4.393
CN	3.203	3.203	3.866		0.0590528		CN	3.205	3.205	3.868	2.151	2.151	3.887		CN	3.199	3.199	3.868	2.15	2.15	3.891		2.145	2.145	3.882
P2	6.067	6.067	10.229		0.0274929		P2	6.069	6.069	10.228	5.891	5.891	10.089		P2	6.037	6.037	10.225	5.878	5.878	10.088		5.875	5.875	10.089
PS	5.463	5.463	9.193		0.0749251		PS	5.468	5.468	9.192	5.654	5.654	9.326		PS	5.436	5.436	9.172	5.614	5.614	9.298		5.655	5.655	9.333
CH3	2.254	2.254	2.168		0.163412		CH3	2.253	2.253	2.174	2.339	2.339	2.331		CH3	2.246	2.246	2.17	2.328	2.327	2.322		2.343	2.344	2.329
NCO	2.169	2.169	4.441		0.798357		NCO	2.148	2.148	4.44	2.292	2.292	4.808		NCO	2.134	2.134	4.439	2.277	2.277	4.807		2.314	2.314	4.809
FCO	2.989	2.161	1.829		0.129335		FCO	2.989	2.16	1.825	3.371	2.405	2.02		FCO	2.982	2.148	1.806	3.363	2.391	1.998		3.372	2.407	2.026
SiH3	4.85	4.85	4.729		0.0208002		SiH3	4.849	4.849	4.728	4.966	4.966	4.896		SiH3	4.855	4.855	4.74	4.971	4.971	4.908		4.968	4.968	4.897
				RMSE	0.2
				MAX	1.16

## Sheet: PTPSS Extrapolate 
a5Z					a5Z/a4Z convergence		aQZ								aTZ
AlF	6.252	6.252	5.209		0.106933		AlF	6.244	6.244	5.211	6.111	6.111	5.307		AlF	6.22	6.22	5.197	6.093	6.093	5.3		6.115	6.115	5.3
Ar	1.646	1.646	1.646		0.242424		Ar	1.65	1.65	1.65	1.675	1.675	1.675		Ar	1.612	1.612	1.612	1.637	1.637	1.637		1.671	1.671	1.671
BeH2	2.939	2.939	3.006		0.0856132		BeH2	2.936	2.936	3.005	2.977	2.977	3.044		BeH2	2.934	2.934	3.015	2.977	2.977	3.056		2.979	2.979	3.044
BF	3.102	3.102	2.645		0.0341961		BF	3.101	3.101	2.646	3.102	3.102	2.757		BF	3.087	3.087	2.654	3.089	3.089	2.77		3.102	3.102	2.752
BH2Cl	3.555	4.066	5.42		0.0106542		BH2Cl	3.555	4.066	5.419	3.598	4.118	5.592		BH2Cl	3.539	4.051	5.418	3.586	4.107	5.597		3.595	4.115	5.589
BH2F	2.076	2.66	2.565		0.0418471		BH2F	2.075	2.661	2.566	2.125	2.717	2.688		BH2F	2.062	2.65	2.569	2.112	2.708	2.693		2.126	2.715	2.686
BH3	2.768	2.768	2.113		0		BH3	2.768	2.768	2.113	2.789	2.789	2.132		BH3	2.766	2.766	2.11	2.788	2.788	2.129		2.788	2.788	2.132
BHF2	2.018	2.514	2.458		0.0589652		BHF2	2.017	2.516	2.459	2.098	2.676	2.58		BHF2	2.001	2.517	2.452	2.081	2.679	2.574		2.1	2.673	2.578
C2H2	2.87	2.87	4.65		0.0863352		C2H2	2.867	2.867	4.649	2.826	2.826	4.581		C2H2	2.861	2.861	4.647	2.825	2.825	4.582		2.825	2.825	4.58
C2H4	3.375	3.743	5.348		0.0926974		C2H4	3.375	3.737	5.348	3.333	3.764	5.217		C2H4	3.376	3.723	5.351	3.34	3.754	5.221		3.329	3.767	5.216
CH2BH	4.311	3.643	5.892		0.0514641		CH2BH	4.311	3.64	5.89	4.261	3.666	5.854		CH2BH	4.31	3.627	5.885	4.268	3.658	5.853		4.255	3.665	5.853
CH3BH2	3.706	4.861	4.283		0.0134769		CH3BH2	3.706	4.861	4.284	3.75	4.979	4.328		CH3BH2	3.703	4.86	4.281	3.749	4.982	4.328		3.749	4.976	4.325
CH3Cl	3.942	3.942	5.425		0.042601		CH3Cl	3.942	3.942	5.421	4	4	5.465		CH3Cl	3.91	3.91	5.407	3.97	3.97	5.455		3.999	3.999	5.466
CH3F	2.373	2.373	2.532		0.0227931		CH3F	2.373	2.373	2.533	2.426	2.426	2.615		CH3F	2.361	2.361	2.532	2.414	2.414	2.615		2.426	2.426	2.613
CH3NH2	4.094	3.563	3.506		0.0231029		CH3NH2	4.094	3.562	3.507	4.197	3.69	3.571		CH3NH2	4.091	3.557	3.503	4.196	3.686	3.569		4.196	3.69	3.569
CH3OH	2.989	3.367	2.888		0.0393393		CH3OH	2.99	3.369	2.888	3.059	3.472	2.982		CH3OH	2.986	3.366	2.877	3.056	3.471	2.971		3.057	3.469	2.982
CH3SH	6.334	5.007	5.009		0.0617004		CH3SH	6.329	5.005	5.012	6.382	5.062	5.087		CH3SH	6.314	4.985	4.992	6.371	5.046	5.072		6.384	5.061	5.08
CH4	2.446	2.446	2.446		0.0408998		CH4	2.445	2.445	2.445	2.473	2.473	2.473		CH4	2.443	2.443	2.443	2.473	2.473	2.473		2.473	2.473	2.473
Cl2	3.657	3.657	6.215		0.179192		Cl2	3.665	3.665	6.213	3.735	3.735	6.21		Cl2	3.625	3.625	6.168	3.695	3.695	6.163		3.727	3.727	6.213
ClCN	3.385	3.385	6.674		0.0296817		ClCN	3.386	3.386	6.672	3.421	3.421	6.769		ClCN	3.372	3.372	6.671	3.411	3.411	6.773		3.417	3.417	6.767
ClF	2.348	2.348	3.324		0.0388816		ClF	2.347	2.347	3.325	2.409	2.409	3.352		ClF	2.306	2.306	3.301	2.364	2.364	3.324		2.413	2.413	3.354
CO	1.729	1.729	2.222		0		CO	1.729	1.729	2.222	1.775	1.775	2.296		CO	1.724	1.724	2.228	1.772	1.772	2.305		1.774	1.774	2.294
CO2	1.847	1.847	3.716		0.132836		CO2	1.844	1.844	3.716	1.907	1.907	3.948		CO2	1.827	1.827	3.723	1.89	1.89	3.957		1.91	1.91	3.947
CS	3.536	3.536	5.543		0.0461558		CS	3.538	3.538	5.543	3.528	3.528	5.614		CS	3.537	3.537	5.543	3.533	3.533	5.619		3.522	3.522	5.61
CSO	3.79	3.79	7.442		0.0864317		CSO	3.794	3.794	7.443	3.821	3.821	7.727		CSO	3.782	3.782	7.445	3.814	3.814	7.735		3.813	3.813	7.722
FCN	2.17	2.17	3.686		0.0753226		FCN	2.168	2.168	3.686	2.192	2.192	3.782		FCN	2.154	2.154	3.69	2.18	2.18	3.789		2.193	2.193	3.78
FNO	3.295	2.365	1.683		0.111603		FNO	3.293	2.364	1.68	3.425	2.457	1.754		FNO	3.282	2.351	1.656	3.413	2.443	1.726		3.428	2.459	1.76
H	0.722	0.722	0.722		0.277778		H	0.72	0.72	0.72	0.72	0.72	0.72		H	0.713	0.713	0.713	0.713	0.713	0.713		0.722	0.722	0.722
H2	0.706	0.706	0.983		0		H2	0.706	0.706	0.983	0.694	0.694	1.118		H2	0.707	0.707	0.982	0.704	0.704	1.017		0.687	0.687	1.191
H2O	1.304	1.436	1.367		0.245492		H2O	1.3	1.436	1.363	1.41	1.493	1.444		H2O	1.275	1.434	1.345	1.38	1.492	1.423		1.418	1.492	1.45
HBO	2.082	2.082	3.056		0.0435107		HBO	2.083	2.083	3.057	2.151	2.151	3.224		HBO	2.072	2.072	3.056	2.141	2.141	3.225		2.149	2.149	3.222
HBS	4.302	4.302	6.618		0.0515629		HBS	4.304	4.304	6.614	4.277	4.277	6.711		HBS	4.297	4.297	6.613	4.278	4.278	6.715		4.269	4.269	6.711
HCCCl	4.04	4.04	8.37		0.0622253		HCCCl	4.037	4.037	8.368	4.042	4.042	8.374		HCCCl	4.021	4.021	8.364	4.03	4.03	8.377		4.042	4.042	8.371
HCCF	2.832	2.832	4.831		0.116104		HCCF	2.828	2.828	4.832	2.816	2.816	4.884		HCCF	2.818	2.818	4.831	2.81	2.81	4.887		2.817	2.817	4.88
HCHO	1.908	2.613	3.265		0.0515208		HCHO	1.907	2.612	3.267	1.933	2.715	3.346		HCHO	1.89	2.598	3.267	1.917	2.702	3.348		1.933	2.715	3.343
HCl	2.478	2.478	2.717		0.176369		HCl	2.483	2.483	2.714	2.526	2.526	2.745		HCl	2.441	2.441	2.69	2.484	2.484	2.723		2.521	2.521	2.747
HCN	2.088	2.088	3.352		0.0521411		HCN	2.087	2.087	3.35	2.089	2.089	3.337		HCN	2.082	2.082	3.353	2.087	2.087	3.343		2.088	2.088	3.337
HCONH2	4.929	3.965	2.882		0.0815544		HCONH2	4.929	3.964	2.878	5.231	4.18	2.985		HCONH2	4.929	3.949	2.863	5.235	4.166	2.971		5.228	4.18	2.988
HCOOH	3.833	3.437	2.342		0.0755681		HCOOH	3.832	3.437	2.339	4.053	3.62	2.426		HCOOH	3.833	3.427	2.32	4.056	3.613	2.406		4.053	3.618	2.43
He	0.209	0.209	0.209		0		He	0.209	0.209	0.209	0.213	0.213	0.213		He	0.208	0.208	0.208	0.211	0.211	0.211		0.214	0.214	0.214
HF	0.735	0.735	0.914		0.785093		HF	0.728	0.728	0.914	0.78	0.78	0.959		HF	0.698	0.698	0.91	0.744	0.744	0.956		0.791	0.791	0.958
HNC	2.286	2.286	3.399		0.0395668		HNC	2.285	2.285	3.398	2.33	2.33	3.486		HNC	2.278	2.278	3.404	2.326	2.326	3.496		2.329	2.329	3.484
HOCl	2.913	2.76	4.231		0.0790213		HOCl	2.915	2.763	4.229	2.993	2.856	4.236		HOCl	2.88	2.724	4.203	2.958	2.815	4.206		2.991	2.854	4.241
HOOH	1.94	2.871	1.764		0.0919104		HOOH	1.939	2.867	1.763	2.042	2.812	1.891		HOOH	1.929	2.856	1.745	2.031	2.799	1.869		2.044	2.817	1.895
LiBH4	4.318	4.318	4.662		0.0226087		LiBH4	4.317	4.317	4.661	4.389	4.389	4.774		LiBH4	4.313	4.313	4.66	4.388	4.388	4.775		4.388	4.388	4.774
LiCl	3.778	3.778	3.947		0.0260899		LiCl	3.779	3.779	3.948	3.945	3.945	4.16		LiCl	3.741	3.741	3.95	3.916	3.916	4.174		3.937	3.937	4.15
LiCN	3.589	3.773	3.076		0.258923		LiCN	3.599	3.782	3.084	3.791	3.921	3.199		LiCN	3.603	3.79	3.082	3.801	3.935	3.202		3.777	3.908	3.187
LiH	4.16	4.16	3.585		0.178728		LiH	4.164	4.164	3.595	4.431	4.431	3.842		LiH	4.171	4.171	3.595	4.446	4.446	3.859		4.421	4.421	3.82
Mg	11.227	11.227	11.227		0.223174		Mg	11.202	11.202	11.202	10.743	10.743	10.743		Mg	11.194	11.194	11.194	10.749	10.749	10.749		10.758	10.758	10.758
Mg2	19.234	19.234	35.075		0.206433		Mg2	19.191	19.191	35.017	18.535	18.535	33.662		Mg2	19.174	19.174	34.975	18.532	18.532	33.653		18.568	18.568	33.696
N2	1.492	1.492	2.221		0		N2	1.492	1.492	2.221	1.516	1.516	2.2		N2	1.49	1.49	2.224	1.515	1.515	2.205		1.515	1.515	2.199
N2H4	3.066	3.704	3.07		0.0407386		N2H4	3.068	3.703	3.07	3.175	3.799	3.231		N2H4	3.067	3.696	3.068	3.175	3.793	3.23		3.172	3.799	3.23
NaCl	4.165	4.165	4.837		0.787053		NaCl	4.191	4.191	4.888	4.412	4.412	5.277		NaCl	4.123	4.123	4.871	4.351	4.351	5.283		4.381	4.381	5.209
NaCN	4.36	3.957	3.374		0.24522		NaCN	4.37	3.965	3.384	4.563	4.222	3.533		NaCN	4.366	3.954	3.372	4.565	4.218	3.527		4.549	4.209	3.519
NaH	5.258	5.258	6.592		0.187757		NaH	5.269	5.269	6.601	5.729	5.729	7.54		NaH	5.267	5.267	6.618	5.741	5.741	7.593		5.708	5.708	7.505
Ne	0.386	0.386	0.386		1.57895		Ne	0.38	0.38	0.38	0.398	0.398	0.398		Ne	0.354	0.354	0.354	0.369	0.369	0.369		0.406	0.406	0.406
NH2Cl	3.404	3.389	5.035		0.106451		NH2Cl	3.408	3.393	5.031	3.496	3.493	5.053		NH2Cl	3.373	3.357	5.008	3.461	3.457	5.03		3.492	3.489	5.057
NH2F	2.04	2.387	2.015		0.177009		NH2F	2.036	2.384	2.011	2.129	2.436	2.097		NH2F	2.016	2.373	1.992	2.106	2.424	2.075		2.135	2.44	2.103
NH2OH	2.572	3.232	2.407		0.043045		NH2OH	2.572	3.23	2.408	2.709	3.282	2.524		NH2OH	2.565	3.225	2.394	2.703	3.277	2.508		2.708	3.284	2.524
NH3	1.98	1.98	2.168		0.106719		NH3	1.98	1.98	2.164	2.04	2.04	2.322		NH3	1.974	1.974	2.144	2.034	2.034	2.3		2.04	2.04	2.327
NH3O	2.569	2.569	3.575		0.547719		NH3O	2.552	2.552	3.579	2.726	2.726	3.876		NH3O	2.484	2.484	3.567	2.642	2.642	3.863		2.755	2.755	3.873
OCl2	4.178	7.81	4.593		0.0557151		OCl2	4.182	7.809	4.593	4.288	7.853	4.681		OCl2	4.134	7.781	4.554	4.239	7.824	4.64		4.285	7.855	4.682
P2H4	7.42	10.747	7.446		0.0322512		P2H4	7.42	10.741	7.446	7.471	10.838	7.506		P2H4	7.417	10.747	7.446	7.472	10.854	7.511		7.468	10.837	7.502
PH2OH	4.889	4.888	4.87		0.011814		PH2OH	4.889	4.887	4.87	4.967	5.045	4.948		PH2OH	4.878	4.89	4.859	4.958	5.052	4.939		4.966	5.043	4.947
PH3	4.449	4.449	4.673		0.0221256		PH3	4.448	4.448	4.674	4.466	4.466	4.716		PH3	4.446	4.446	4.672	4.466	4.466	4.718		4.466	4.466	4.712
PH3O	4.04	4.04	4.735		0.0527584		PH3O	4.039	4.039	4.739	4.167	4.167	5.021		PH3O	4.026	4.026	4.746	4.155	4.155	5.031		4.167	4.167	5.015
S2H2	5.653	8.307	5.623		0.0859359		S2H2	5.658	8.299	5.627	5.742	8.381	5.711		S2H2	5.633	8.273	5.603	5.721	8.357	5.691		5.734	8.388	5.704
SCl2	5.547	9.975	7.014		0.104863		SCl2	5.557	9.973	7.015	5.673	10.169	7.106		SCl2	5.52	9.936	6.972	5.639	10.133	7.064		5.661	10.17	7.104
SF2	3.181	3.721	3.385		0.0649879		SF2	3.178	3.723	3.384	3.278	3.865	3.505		SF2	3.123	3.698	3.354	3.222	3.838	3.473		3.282	3.864	3.507
SH2	3.689	3.599	3.582		0.132964		SH2	3.697	3.597	3.58	3.76	3.623	3.618		SH2	3.671	3.571	3.552	3.739	3.598	3.592		3.748	3.624	3.619
SiH3Cl	5.665	5.665	7.105		0.0406585		SiH3Cl	5.665	5.665	7.1	5.75	5.75	7.271		SiH3Cl	5.651	5.651	7.109	5.738	5.738	7.285		5.749	5.749	7.272
SiH3F	4.232	4.232	3.819		0.019298		SiH3F	4.231	4.231	3.819	4.316	4.316	3.952		SiH3F	4.223	4.223	3.827	4.308	4.308	3.962		4.317	4.317	3.951
SiH4	4.602	4.602	4.602		0.0434783		SiH4	4.6	4.6	4.6	4.657	4.657	4.657		SiH4	4.605	4.605	4.605	4.662	4.662	4.662		4.659	4.659	4.659
SiO	4.041	4.041	4.819		0.08521		SiO	4.038	4.038	4.824	4.109	4.109	5.211		SiO	4.025	4.025	4.826	4.102	4.102	5.217		4.108	4.108	5.203
SO2	2.841	4.826	3.263		0.0833049		SO2	2.837	4.826	3.262	2.909	5.037	3.432		SO2	2.801	4.826	3.247	2.873	5.039	3.419		2.913	5.036	3.432
Be	6.527	6.527	6.527		0.138079		Be	6.518	6.518	6.518	6.227	6.227	6.227		Be	6.506	6.506	6.506	6.215	6.215	6.215		6.236	6.236	6.236
BeH	5.512	5.512	3.95		0.238795		BeH	5.523	5.523	3.962	5.521	5.521	4.02		BeH	5.498	5.498	3.944	5.494	5.494	4.006		5.511	5.511	4.005
BH2	2.866	3.06	2.938		0.0798904		BH2	2.864	3.057	2.936	2.891	3.106	2.968		BH2	2.859	3.054	2.933	2.885	3.106	2.967		2.894	3.107	2.969
BN	3.111	3.111	3.89		0.0786606		BN	3.114	3.114	3.89	3.233	3.233	4.304		BN	3.103	3.103	3.889	3.226	3.226	4.307		3.227	3.227	4.301
BO	2.262	2.262	2.714		0.0360803		BO	2.263	2.263	2.714	2.354	2.354	2.926		BO	2.251	2.251	2.714	2.344	2.344	2.929		2.352	2.352	2.924
BS	4.449	4.449	6.311		0.0586655		BS	4.451	4.451	6.306	4.454	4.454	6.474		BS	4.445	4.445	6.306	4.454	4.454	6.481		4.448	4.448	6.474
C2H	3.466	3.466	4.025		0.0492248		C2H	3.468	3.468	4.024	3.666	3.666	3.97		C2H	3.465	3.465	4.021	3.668	3.668	3.97		3.66	3.66	3.969
C2H3	3.438	5.162	3.238		0.103108		C2H3	3.432	5.161	3.237	3.494	5.112	3.207		C2H3	3.419	5.163	3.237	3.484	5.116	3.21		3.498	5.112	3.206
CH2F	2.197	2.481	2.306		0.200633		CH2F	2.19	2.48	2.303	2.294	2.602	2.37		CH2F	2.168	2.471	2.286	2.271	2.592	2.352		2.302	2.604	2.374
CH2NH	3.196	2.537	4.319		0.0361522		CH2NH	3.194	2.537	4.319	3.274	2.548	4.305		CH2NH	3.189	2.529	4.322	3.271	2.541	4.31		3.275	2.547	4.304
CH2PH	7.842	5.064	5.701		0.0299788		CH2PH	7.839	5.064	5.699	7.637	4.987	5.717		CH2PH	7.842	5.065	5.686	7.644	4.997	5.71		7.637	4.98	5.715
CH2-t	2.142	2.318	2.031		0.15384		CH2-t	2.143	2.314	2.027	2.19	2.342	2.067		CH2-t	2.135	2.304	2.018	2.18	2.333	2.056		2.19	2.345	2.072
CH3O	4.068	2.748	3.284		0.236583		CH3O	4.059	2.74	3.278	4.302	2.811	3.469		CH3O	4.037	2.727	3.279	4.28	2.797	3.471		4.311	2.82	3.474
F2	0.9	0.9	1.978		0.197754		F2	0.899	0.899	1.972	0.959	0.959	1.845		F2	0.867	0.867	1.953	0.92	0.92	1.823		0.965	0.965	1.853
FH-OH	1.839	1.553	2.21		0.371534		FH-OH	1.832	1.545	2.21	1.926	1.629	2.36		FH-OH	1.799	1.503	2.206	1.886	1.58	2.358		1.938	1.642	2.359
H2CN	2.262	2.747	3.675		0.0698806		H2CN	2.261	2.744	3.674	2.281	2.813	3.721		H2CN	2.253	2.736	3.679	2.275	2.806	3.726		2.281	2.815	3.722
H2O-Li	37.829	33.121	39.12		0.108014		H2O-Li	37.791	33.069	39.115	36.814	31.969	41.833		H2O-Li	37.581	32.923	39.107	36.65	31.864	41.81		36.818	31.991	41.849
HCHS	3.958	4.625	6.806		0.0945805		HCHS	3.964	4.624	6.802	3.92	4.673	6.666		HCHS	3.936	4.597	6.792	3.898	4.652	6.659		3.91	4.67	6.668
HCO	2.574	2.94	1.894		0.144961		HCO	2.571	2.938	1.89	2.695	2.961	1.946		HCO	2.558	2.932	1.875	2.682	2.958	1.931		2.698	2.961	1.95
HCP	4.564	4.564	7.049		0.00819169		HCP	4.564	4.564	7.048	4.495	4.495	6.936		HCP	4.555	4.555	7.056	4.494	4.494	6.948		4.489	4.489	6.934
HNO	1.574	2.237	2.787		0.214885		HNO	1.57	2.231	2.786	1.594	2.373	2.792		HNO	1.55	2.21	2.783	1.573	2.351	2.788		1.599	2.38	2.794
HNS	5.81	4.016	3.374		0.083325		HNS	5.805	4.02	3.376	5.674	4.117	3.363		HNS	5.792	3.988	3.343	5.662	4.088	3.332		5.678	4.111	3.36
HO2	1.662	2.606	1.409		0.130419		HO2	1.659	2.603	1.408	1.755	2.801	1.477		HO2	1.639	2.594	1.386	1.729	2.792	1.449		1.762	2.804	1.482
HOF	1.464	1.275	2.36		0.234315		HOF	1.46	1.273	2.354	1.541	1.37	2.287		HOF	1.439	1.247	2.338	1.517	1.338	2.268		1.547	1.376	2.295
Li	22.411	22.411	22.411		0.0401427		Li	22.42	22.42	22.42	22.253	22.253	22.253		Li	22.424	22.424	22.424	22.273	22.273	22.273		22.232	22.232	22.232
Li2	25.658	25.658	38.458		0.202945		Li2	25.601	25.601	38.398	25.168	25.168	40.389		Li2	25.52	25.52	38.26	25.082	25.082	40.342		25.229	25.229	40.383
N	1.129	1.129	1.129		0.0884956		N	1.13	1.13	1.13	1.121	1.121	1.121		N	1.118	1.118	1.118	1.11	1.11	1.11		1.119	1.119	1.119
N2H2	3.552	2.053	2.84		0.0520713		N2H2	3.551	2.052	2.838	3.548	2.076	2.939		N2H2	3.549	2.044	2.834	3.547	2.069	2.937		3.548	2.076	2.94
Na	24.539	24.539	24.539		0.27788		Na	24.471	24.471	24.471	23.84	23.84	23.84		Na	24.44	24.44	24.44	23.779	23.779	23.779		23.93	23.93	23.93
Na2	31.241	31.241	53.38		0.0682513		Na2	31.233	31.233	53.32	30.173	30.173	54.197		Na2	31.162	31.162	53.381	30.188	30.188	54.351		30.118	30.118	54.189
NaLi	28.41	28.41	46.035		0.123067		NaLi	28.398	28.398	45.941	27.675	27.675	47.57		NaLi	28.335	28.335	45.943	27.642	27.642	47.649		27.665	27.665	47.608
NH	1.338	1.338	1.678		0.14031		NH	1.336	1.336	1.676	1.358	1.358	1.718		NH	1.322	1.322	1.669	1.343	1.343	1.712		1.361	1.361	1.719
NH2	1.544	1.848	1.877		0.196637		NH2	1.54	1.849	1.873	1.593	1.894	1.96		NH2	1.521	1.846	1.857	1.571	1.893	1.943		1.599	1.892	1.965
NO	1.45	1.45	2.249		0.186019		NO	1.447	1.447	2.246	1.521	1.521	2.27		NO	1.431	1.431	2.241	1.502	1.502	2.264		1.526	1.526	2.274
NOCl	4.733	6.849	3.326		0.0719919		NOCl	4.736	6.845	3.329	4.847	6.894	3.411		NOCl	4.702	6.832	3.287	4.812	6.888	3.366		4.845	6.893	3.41
NP	3.572	3.572	5.383		0.0228646		NP	3.571	3.571	5.383	3.58	3.58	5.451		NP	3.56	3.56	5.383	3.575	3.575	5.454		3.577	3.577	5.449
O2	1.167	1.167	2.448		0.0944927		O2	1.167	1.167	2.444	1.223	1.223	2.287		O2	1.15	1.15	2.437	1.201	1.201	2.28		1.227	1.227	2.291
O3	1.71	4.928	1.996		0.121151		O3	1.71	4.925	1.992	1.738	4.344	2.115		O3	1.683	4.915	1.971	1.71	4.339	2.093		1.739	4.343	2.12
OCl	2.495	2.495	4.086		0		OCl	2.495	2.495	4.086	2.553	2.553	4.368		OCl	2.459	2.459	4.065	2.512	2.512	4.345		2.557	2.557	4.369
OF	1.072	1.072	1.97		0.192588		OF	1.07	1.07	1.966	1.144	1.144	2.041		OF	1.044	1.044	1.953	1.11	1.11	2.026		1.152	1.152	2.046
OF2	1.378	2.992	1.957		0.131684		OF2	1.378	2.989	1.953	1.471	2.953	1.984		OF2	1.351	2.972	1.929	1.437	2.932	1.954		1.476	2.959	1.992
OH	1.07	1.07	1.236		0.309924		OH	1.066	1.066	1.235	1.138	1.138	1.282		OH	1.036	1.036	1.228	1.104	1.104	1.276		1.145	1.145	1.282
P	3.846	3.846	3.846		0.0259943		P	3.847	3.847	3.847	3.809	3.809	3.809		P	3.845	3.845	3.845	3.809	3.809	3.809		3.807	3.807	3.807
PH	4.014	4.014	4.423		0.0427051		PH	4.016	4.016	4.424	4.007	4.007	4.438		PH	4.014	4.014	4.41	4.007	4.007	4.426		4.004	4.004	4.436
PH2	4.159	4.463	4.553		0.0189747		PH2	4.16	4.462	4.553	4.174	4.478	4.583		PH2	4.163	4.455	4.542	4.179	4.471	4.575		4.172	4.479	4.581
S2	4.645	4.645	9.067		0.140959		S2	4.653	4.653	9.065	4.717	4.717	8.689		S2	4.635	4.635	9.046	4.699	4.699	8.68		4.709	4.709	8.684
SCl	4.383	4.383	7.099		0.205855		SCl	4.394	4.394	7.096	4.487	4.487	7.296		SCl	4.36	4.36	7.063	4.456	4.456	7.264		4.474	4.474	7.298
SF	3.225	3.225	3.525		0.082724		SF	3.227	3.227	3.529	3.31	3.31	3.662		SF	3.182	3.182	3.511	3.265	3.265	3.644		3.308	3.308	3.658
SH	3.498	3.498	3.481		0.21215		SH	3.507	3.507	3.479	3.558	3.558	3.507		SH	3.479	3.479	3.451	3.534	3.534	3.481		3.546	3.546	3.508
SO-trip	2.912	2.912	4.379		0.115362		SO-trip	2.908	2.908	4.381	2.987	2.987	4.365		SO-trip	2.874	2.874	4.371	2.947	2.947	4.353		2.995	2.995	4.364
CN	2.737	2.737	3.5		0.0340815		CN	2.738	2.738	3.499	2.589	2.589	4.197		CN	2.734	2.734	3.504	2.592	2.592	4.202		2.583	2.583	4.198
P2	6.064	6.064	10.318		0.0606667		P2	6.068	6.068	10.313	5.959	5.959	10.19		P2	6.061	6.061	10.317	5.966	5.966	10.201		5.945	5.945	10.19
PS	5.645	5.645	9.326		0.118175		PS	5.653	5.653	9.322	5.73	5.73	9.385		PS	5.631	5.631	9.304	5.713	5.713	9.371		5.718	5.718	9.386
CH3	2.352	2.352	2.358		0.141233		CH3	2.348	2.348	2.359	2.382	2.382	2.428		CH3	2.335	2.335	2.348	2.368	2.368	2.417		2.387	2.387	2.427
NCO	2.23	2.23	4.596		0.109991		NCO	2.227	2.227	4.596	2.284	2.284	4.816		NCO	2.214	2.214	4.604	2.272	2.272	4.827		2.286	2.286	4.814
FCO	3.184	2.331	1.961		0.0936387		FCO	3.183	2.33	1.958	3.382	2.456	2.045		FCO	3.181	2.318	1.937	3.381	2.446	2.023		3.382	2.456	2.049
SiH3	5.021	5.021	4.962		0.0568176		SiH3	5.019	5.019	4.958	5.071	5.071	5.037		SiH3	5.022	5.022	4.971	5.075	5.075	5.052		5.072	5.072	5.04
				RMSE	0.22
				MAX	1.58

## Sheet: PWPB95 Extrapolate
a5Z					a5Z/a4Z convergence		aQZ								aTZ
AlF	6.209	6.209	5.226		0.0343509		AlF	6.207	6.207	5.228	6.109	6.109	5.295		AlF	6.167	6.167	5.206	6.074	6.074	5.279		6.107	6.107	5.289
Ar	1.648	1.648	1.648		0.242131		Ar	1.652	1.652	1.652	1.67	1.67	1.67		Ar	1.605	1.605	1.605	1.623	1.623	1.623		1.666	1.666	1.666
BeH2	2.951	2.951	3.038		0.0585468		BeH2	2.949	2.949	3.037	2.982	2.982	3.068		BeH2	2.945	2.945	3.044	2.978	2.978	3.077		2.984	2.984	3.068
BF	3.09	3.09	2.67		0.057129		BF	3.088	3.088	2.671	3.089	3.089	2.753		BF	3.075	3.075	2.673	3.078	3.078	2.759		3.09	3.09	2.749
BH2Cl	3.566	4.083	5.463		0.0214972		BH2Cl	3.565	4.084	5.463	3.597	4.123	5.594		BH2Cl	3.543	4.062	5.454	3.578	4.104	5.59		3.596	4.12	5.59
BH2F	2.087	2.676	2.582		0.0943635		BH2F	2.084	2.676	2.584	2.121	2.718	2.675		BH2F	2.073	2.666	2.586	2.11	2.71	2.679		2.124	2.717	2.672
BH3	2.787	2.787	2.126		0.0271439		BH3	2.787	2.787	2.127	2.803	2.803	2.142		BH3	2.786	2.786	2.126	2.803	2.803	2.141		2.802	2.802	2.141
BHF2	2.028	2.533	2.474		0.088516		BHF2	2.025	2.534	2.474	2.084	2.654	2.563		BHF2	2.01	2.534	2.467	2.069	2.655	2.558		2.087	2.652	2.562
C2H2	2.875	2.875	4.671		0.142247		C2H2	2.87	2.87	4.671	2.84	2.84	4.62		C2H2	2.851	2.851	4.669	2.825	2.825	4.621		2.842	2.842	4.618
C2H4	3.379	3.762	5.35		0.102889		C2H4	3.375	3.757	5.35	3.345	3.778	5.258		C2H4	3.367	3.739	5.353	3.341	3.763	5.262		3.346	3.781	5.257
CH2BH	4.314	3.666	5.911		0.0617452		CH2BH	4.312	3.663	5.908	4.276	3.683	5.887		CH2BH	4.306	3.648	5.901	4.275	3.671	5.884		4.274	3.684	5.887
CH3BH2	3.728	4.914	4.31		0		CH3BH2	3.728	4.914	4.31	3.762	5.005	4.344		CH3BH2	3.726	4.914	4.308	3.761	5.007	4.344		3.761	5.004	4.343
CH3Cl	3.955	3.955	5.452		0.0295857		CH3Cl	3.954	3.954	5.45	3.997	3.997	5.484		CH3Cl	3.912	3.912	5.429	3.956	3.956	5.465		3.997	3.997	5.485
CH3F	2.384	2.384	2.543		0.0453713		CH3F	2.384	2.384	2.545	2.423	2.423	2.606		CH3F	2.373	2.373	2.543	2.412	2.412	2.605		2.423	2.423	2.603
CH3NH2	4.125	3.583	3.523		0.0229828		CH3NH2	4.125	3.582	3.524	4.203	3.677	3.573		CH3NH2	4.12	3.575	3.52	4.199	3.672	3.57		4.202	3.677	3.571
CH3OH	3.003	3.387	2.903		0.0324898		CH3OH	3.004	3.388	2.902	3.055	3.466	2.972		CH3OH	3	3.384	2.891	3.052	3.463	2.961		3.053	3.464	2.973
CH3SH	6.369	5.022	5.021		0.0356281		CH3SH	6.366	5.02	5.021	6.406	5.063	5.077		CH3SH	6.343	4.99	4.986	6.385	5.035	5.046		6.408	5.064	5.074
CH4	2.459	2.459	2.459		0		CH4	2.459	2.459	2.459	2.48	2.48	2.48		CH4	2.457	2.457	2.457	2.479	2.479	2.479		2.479	2.479	2.479
Cl2	3.66	3.66	6.224		0.178321		Cl2	3.668	3.668	6.225	3.72	3.72	6.224		Cl2	3.608	3.608	6.16	3.659	3.659	6.158		3.713	3.713	6.224
ClCN	3.391	3.391	6.698		0.00862103		ClCN	3.391	3.391	6.697	3.418	3.418	6.77		ClCN	3.365	3.365	6.686	3.394	3.394	6.762		3.417	3.417	6.769
ClF	2.35	2.35	3.323		0.105804		ClF	2.347	2.347	3.322	2.393	2.393	3.343		ClF	2.296	2.296	3.29	2.34	2.34	3.309		2.397	2.397	3.345
CO	1.734	1.734	2.229		0.0471146		CO	1.733	1.733	2.229	1.767	1.767	2.284		CO	1.725	1.725	2.23	1.761	1.761	2.287		1.767	1.767	2.283
CO2	1.852	1.852	3.737		0.179415		CO2	1.848	1.848	3.735	1.894	1.894	3.906		CO2	1.827	1.827	3.736	1.873	1.873	3.908		1.898	1.898	3.907
CS	3.539	3.539	5.553		0.0253007		CS	3.54	3.54	5.552	3.535	3.535	5.609		CS	3.523	3.523	5.544	3.522	3.522	5.605		3.531	3.531	5.607
CSO	3.79	3.79	7.46		0.0215378		CSO	3.791	3.791	7.46	3.812	3.812	7.667		CSO	3.762	3.762	7.453	3.786	3.786	7.664		3.809	3.809	7.664
FCN	2.174	2.174	3.699		0.151314		FCN	2.17	2.17	3.698	2.188	2.188	3.77		FCN	2.153	2.153	3.697	2.172	2.172	3.771		2.191	2.191	3.77
FNO	3.303	2.373	1.69		0.229253		FNO	3.299	2.37	1.684	3.399	2.44	1.739		FNO	3.284	2.354	1.659	3.384	2.424	1.712		3.403	2.443	1.746
H	0.734	0.734	0.734		0.547945		H	0.73	0.73	0.73	0.73	0.73	0.73		H	0.718	0.718	0.718	0.718	0.718	0.718		0.734	0.734	0.734
H2	0.709	0.709	0.986		0		H2	0.709	0.709	0.986	0.709	0.709	0.986		H2	0.709	0.709	0.985	0.709	0.709	0.986		0.709	0.709	0.985
H2O	1.311	1.443	1.374		0.374859		H2O	1.304	1.443	1.369	1.385	1.486	1.429		H2O	1.28	1.44	1.351	1.358	1.483	1.409		1.394	1.486	1.435
HBO	2.086	2.086	3.075		0.0434263		HBO	2.085	2.085	3.076	2.135	2.135	3.198		HBO	2.078	2.078	3.074	2.13	2.13	3.198		2.135	2.135	3.196
HBS	4.302	4.302	6.641		0.0208724		HBS	4.303	4.303	6.64	4.283	4.283	6.71		HBS	4.283	4.283	6.631	4.269	4.269	6.706		4.278	4.278	6.707
HCCCl	4.047	4.047	8.408		0.060571		HCCCl	4.044	4.044	8.408	4.048	4.048	8.413		HCCCl	4.008	4.008	8.396	4.015	4.015	8.407		4.049	4.049	8.409
HCCF	2.834	2.834	4.852		0.116018		HCCF	2.83	2.83	4.851	2.822	2.822	4.891		HCCF	2.809	2.809	4.85	2.804	2.804	4.891		2.824	2.824	4.891
HCHO	1.915	2.627	3.275		0.041278		HCHO	1.914	2.626	3.276	1.934	2.703	3.336		HCHO	1.896	2.611	3.275	1.916	2.688	3.335		1.935	2.704	3.335
HCl	2.479	2.479	2.725		0.176239		HCl	2.484	2.484	2.722	2.516	2.516	2.746		HCl	2.428	2.428	2.691	2.46	2.46	2.716		2.511	2.511	2.748
HCN	2.094	2.094	3.364		0.0519756		HCN	2.093	2.093	3.362	2.095	2.095	3.354		HCN	2.083	2.083	3.363	2.087	2.087	3.356		2.095	2.095	3.355
HCONH2	4.968	3.994	2.895		0.121333		HCONH2	4.967	3.993	2.889	5.193	4.155	2.969		HCONH2	4.963	3.976	2.871	5.192	4.139	2.952		5.192	4.155	2.974
HCOOH	3.857	3.459	2.353		0.123853		HCOOH	3.856	3.459	2.348	4.021	3.596	2.412		HCOOH	3.853	3.448	2.327	4.02	3.588	2.392		4.021	3.594	2.416
He	0.211	0.211	0.211		0.47619		He	0.21	0.21	0.21	0.213	0.213	0.213		He	0.208	0.208	0.208	0.211	0.211	0.211		0.214	0.214	0.214
HF	0.737	0.737	0.918		1.01137		HF	0.728	0.728	0.917	0.766	0.766	0.95		HF	0.699	0.699	0.913	0.733	0.733	0.947		0.778	0.778	0.95
HNC	2.294	2.294	3.415		0.112143		HNC	2.291	2.291	3.413	2.326	2.326	3.481		HNC	2.278	2.278	3.414	2.314	2.314	3.485		2.328	2.328	3.481
HOCl	2.918	2.764	4.235		0.03964		HOCl	2.919	2.765	4.233	2.977	2.834	4.239		HOCl	2.873	2.715	4.197	2.931	2.783	4.201		2.976	2.834	4.242
HOOH	1.948	2.872	1.773		0.200795		HOOH	1.946	2.867	1.768	2.023	2.83	1.863		HOOH	1.934	2.853	1.749	2.011	2.815	1.842		2.025	2.836	1.869
LiBH4	4.343	4.343	4.722		0		LiBH4	4.343	4.343	4.722	4.398	4.398	4.81		LiBH4	4.34	4.34	4.723	4.398	4.398	4.813		4.396	4.396	4.809
LiCl	3.807	3.807	4.016		0.0870736		LiCl	3.803	3.803	4.017	3.929	3.929	4.182		LiCl	3.763	3.763	4.017	3.896	3.896	4.192		3.928	3.928	4.174
LiCN	3.657	3.808	3.106		0.0218829		LiCN	3.658	3.809	3.106	3.815	3.917	3.194		LiCN	3.66	3.812	3.101	3.821	3.924	3.193		3.811	3.913	3.191
LiH	4.217	4.217	3.828		0.0580448		LiH	4.22	4.22	3.828	4.431	4.431	4.059		LiH	4.224	4.224	3.832	4.404	4.404	4.038		4.451	4.451	4.077
Mg	11.124	11.124	11.124		0.107759		Mg	11.136	11.136	11.136	10.803	10.803	10.803		Mg	11.126	11.126	11.126	10.803	10.803	10.803		10.784	10.784	10.784
Mg2	19.047	19.047	34.507		0.148241		Mg2	19.081	19.081	34.524	18.606	18.606	33.573		Mg2	19.067	19.067	34.508	18.606	18.606	33.582		18.562	18.562	33.538
N2	1.499	1.499	2.226		0.0603672		N2	1.498	1.498	2.225	1.516	1.516	2.211		N2	1.49	1.49	2.225	1.51	1.51	2.211		1.516	1.516	2.212
N2H4	3.083	3.73	3.089		0.0485833		N2H4	3.085	3.728	3.089	3.165	3.801	3.21		N2H4	3.082	3.718	3.084	3.164	3.791	3.206		3.162	3.803	3.209
NaCl	4.208	4.208	5.06		0.8273		NaCl	4.23	4.23	5.123	4.4	4.4	5.455		NaCl	4.161	4.161	5.105	4.337	4.337	5.454		4.374	4.374	5.38
NaCN	4.433	4.081	3.42		0.0921785		NaCN	4.429	4.077	3.417	4.587	4.289	3.533		NaCN	4.423	4.065	3.403	4.586	4.281	3.523		4.587	4.29	3.533
NaH	5.293	5.293	7.154		0.116905		NaH	5.295	5.295	7.168	5.64	5.64	8.003		NaH	5.3	5.3	7.201	5.655	5.655	8.063		5.631	5.631	7.969
Ne	0.387	0.387	0.387		2.38095		Ne	0.378	0.378	0.378	0.392	0.392	0.392		Ne	0.353	0.353	0.353	0.364	0.364	0.364		0.403	0.403	0.403
NH2Cl	3.413	3.398	5.049		0.0796414		NH2Cl	3.416	3.401	5.046	3.481	3.475	5.064		NH2Cl	3.369	3.353	5.014	3.435	3.428	5.031		3.477	3.471	5.068
NH2F	2.05	2.392	2.024		0.233285		NH2F	2.044	2.389	2.019	2.113	2.428	2.083		NH2F	2.024	2.376	2	2.091	2.415	2.062		2.12	2.431	2.089
NH2OH	2.586	3.245	2.42		0.0483349		NH2OH	2.585	3.243	2.419	2.688	3.284	2.506		NH2OH	2.577	3.235	2.405	2.681	3.276	2.49		2.688	3.286	2.508
NH3	1.992	1.992	2.183		0.212359		NH3	1.992	1.992	2.175	2.037	2.037	2.293		NH3	1.985	1.985	2.155	2.029	2.029	2.272		2.038	2.038	2.302
NH3O	2.586	2.586	3.616		0.703481		NH3O	2.564	2.564	3.62	2.694	2.694	3.848		NH3O	2.498	2.498	3.607	2.617	2.617	3.833		2.724	2.724	3.845
OCl2	4.184	7.833	4.599		0.0200575		OCl2	4.185	7.834	4.598	4.264	7.875	4.665		OCl2	4.118	7.789	4.543	4.195	7.829	4.607		4.264	7.875	4.668
P2H4	7.434	10.792	7.459		0.0160539		P2H4	7.434	10.789	7.459	7.473	10.861	7.504		P2H4	7.416	10.774	7.44	7.458	10.852	7.489		7.471	10.86	7.501
PH2OH	4.9	4.9	4.882		0.0166974		PH2OH	4.9	4.899	4.881	4.959	5.018	4.939		PH2OH	4.882	4.892	4.863	4.943	5.012	4.923		4.958	5.018	4.939
PH3	4.459	4.459	4.678		0.0123392		PH3	4.459	4.459	4.679	4.473	4.473	4.71		PH3	4.449	4.449	4.658	4.464	4.464	4.692		4.472	4.472	4.707
PH3O	4.061	4.061	4.767		0.0629413		PH3O	4.059	4.059	4.771	4.154	4.154	4.981		PH3O	4.047	4.047	4.776	4.142	4.142	4.989		4.156	4.156	4.975
S2H2	5.664	8.335	5.633		0.0400457		S2H2	5.666	8.331	5.635	5.729	8.392	5.697		S2H2	5.62	8.284	5.589	5.685	8.347	5.654		5.726	8.395	5.693
SCl2	5.553	10.021	7.024		0.0848632		SCl2	5.561	10.022	7.026	5.647	10.171	7.094		SCl2	5.497	9.959	6.959	5.584	10.109	7.028		5.638	10.169	7.091
SF2	3.178	3.727	3.387		0.105531		SF2	3.173	3.728	3.384	3.247	3.834	3.474		SF2	3.111	3.697	3.348	3.184	3.801	3.436		3.253	3.834	3.478
SH2	3.688	3.608	3.59		0.0703448		SH2	3.692	3.608	3.588	3.739	3.627	3.617		SH2	3.646	3.571	3.548	3.696	3.592	3.578		3.733	3.626	3.618
SiH3Cl	5.69	5.69	7.155		0.00807031		SiH3Cl	5.69	5.69	7.154	5.754	5.754	7.284		SiH3Cl	5.667	5.667	7.153	5.733	5.733	7.287		5.753	5.753	7.282
SiH3F	4.257	4.257	3.842		0.041214		SiH3F	4.255	4.255	3.843	4.32	4.32	3.943		SiH3F	4.247	4.247	3.849	4.312	4.312	3.951		4.322	4.322	3.941
SiH4	4.63	4.63	4.63		0.0216029		SiH4	4.629	4.629	4.629	4.672	4.672	4.672		SiH4	4.631	4.631	4.631	4.675	4.675	4.675		4.672	4.672	4.672
SiO	4.024	4.024	4.828		0.0774286		SiO	4.021	4.021	4.832	4.074	4.074	5.116		SiO	4.002	4.002	4.826	4.059	4.059	5.112		4.074	4.074	5.111
SO2	2.844	4.844	3.272		0.127625		SO2	2.838	4.843	3.27	2.892	4.998	3.396		SO2	2.801	4.839	3.251	2.855	4.996	3.379		2.898	4.998	3.397
Be	6.364	6.364	6.364		0.047118		Be	6.367	6.367	6.367	6.16	6.16	6.16		Be	6.339	6.339	6.339	6.137	6.137	6.137		6.153	6.153	6.153
BeH	5.44	5.44	3.975		0.228186		BeH	5.447	5.447	3.989	5.447	5.447	4.034		BeH	5.417	5.417	3.957	5.416	5.416	4.004		5.441	5.441	4.019
BH2	2.914	3.159	2.987		0.101954		BH2	2.911	3.155	2.985	2.932	3.195	3.01		BH2	2.901	3.145	2.981	2.921	3.186	3.007		2.936	3.198	3.011
BN	3.14	3.14	3.982		0.0144954		BN	3.14	3.14	3.983	3.241	3.241	4.369		BN	3.133	3.133	3.98	3.236	3.236	4.368		3.24	3.24	4.367
BO	2.271	2.271	2.737		0.035969		BO	2.27	2.27	2.737	2.34	2.34	2.9		BO	2.26	2.26	2.736	2.332	2.332	2.9		2.34	2.34	2.899
BS	4.46	4.46	6.366		0.0408486		BS	4.462	4.462	6.364	4.468	4.468	6.498		BS	4.442	4.442	6.354	4.454	4.454	6.493		4.462	4.462	6.496
C2H	3.566	3.566	4.048		0.0479887		C2H	3.564	3.564	4.047	3.76	3.76	4.01		C2H	3.555	3.555	4.045	3.759	3.759	4.01		3.756	3.756	4.01
C2H3	3.476	5.192	3.248		0.123117		C2H3	3.47	5.191	3.244	3.52	5.164	3.223		C2H3	3.451	5.191	3.233	3.503	5.166	3.214		3.525	5.164	3.226
CH2F	2.241	2.509	2.328		0.224622		CH2F	2.233	2.507	2.325	2.314	2.599	2.376		CH2F	2.207	2.494	2.308	2.287	2.585	2.359		2.323	2.602	2.379
CH2NH	3.213	2.546	4.328		0.0506093		CH2NH	3.212	2.544	4.327	3.271	2.553	4.322		CH2NH	3.204	2.533	4.328	3.265	2.543	4.324		3.271	2.554	4.322
CH2PH	7.83	5.054	5.714		0.0404837		CH2PH	7.829	5.051	5.712	7.688	4.996	5.726		CH2PH	7.825	5.032	5.689	7.687	4.982	5.708		7.687	4.995	5.724
CH2-t	2.183	2.35	2.067		0.188686		CH2-t	2.18	2.346	2.062	2.215	2.368	2.092		CH2-t	2.162	2.33	2.043	2.197	2.353	2.072		2.218	2.371	2.098
CH3O	4.127	2.757	3.327		0.0428694		CH3O	4.126	2.756	3.329	4.321	2.81	3.481		CH3O	4.103	2.742	3.327	4.299	2.795	3.479		4.321	2.812	3.479
F2	0.903	0.903	1.971		0.583631		F2	0.897	0.897	1.964	0.941	0.941	1.874		F2	0.865	0.865	1.942	0.903	0.903	1.85		0.951	0.951	1.882
FH-OH	1.847	1.562	2.225		0.547032		FH-OH	1.837	1.55	2.224	1.906	1.612	2.338		FH-OH	1.804	1.507	2.218	1.87	1.565	2.334		1.918	1.627	2.338
H2CN	2.273	2.765	3.7		0.0658164		H2CN	2.271	2.763	3.7	2.287	2.817	3.739		H2CN	2.259	2.75	3.702	2.276	2.805	3.742		2.288	2.818	3.738
H2O-Li	35.439	31.122	39.213		0.0769087		H2O-Li	35.436	31.124	39.161	34.656	30.283	40.416		H2O-Li	35.25	31.014	39.135	34.497	30.196	40.377		34.639	30.264	40.477
HCHS	3.958	4.63	6.804		0.0506034		HCHS	3.961	4.63	6.801	3.93	4.667	6.706		HCHS	3.916	4.583	6.786	3.888	4.625	6.694		3.925	4.663	6.707
HCO	2.597	2.935	1.912		0.170068		HCO	2.594	2.933	1.907	2.687	2.944	1.948		HCO	2.579	2.923	1.889	2.673	2.935	1.93		2.689	2.945	1.953
HCP	4.558	4.558	7.056		0.0367645		HCP	4.556	4.556	7.057	4.505	4.505	6.975		HCP	4.527	4.527	7.058	4.483	4.483	6.979		4.502	4.502	6.972
HNO	1.581	2.248	2.792		0.316486		HNO	1.574	2.241	2.79	1.593	2.347	2.799		HNO	1.551	2.218	2.782	1.568	2.323	2.79		1.601	2.355	2.802
HNS	5.805	4.017	3.375		0.0524173		HNS	5.802	4.02	3.375	5.715	4.094	3.367		HNS	5.779	3.972	3.328	5.693	4.047	3.32		5.717	4.09	3.367
HO2	1.67	2.637	1.415		0.304873		HO2	1.664	2.633	1.41	1.736	2.759	1.46		HO2	1.641	2.62	1.384	1.709	2.745	1.432		1.745	2.764	1.466
HOF	1.469	1.28	2.356		0.389523		HOF	1.463	1.274	2.35	1.523	1.345	2.303		HOF	1.442	1.248	2.33	1.499	1.316	2.282		1.531	1.353	2.31
Li	20.716	20.716	20.716		0.0144837		Li	20.713	20.713	20.713	20.614	20.614	20.614		Li	20.752	20.752	20.752	20.666	20.666	20.666		20.608	20.608	20.608
Li2	24.698	24.698	39.284		0.365131		Li2	24.724	24.724	39.044	24.299	24.299	40.626		Li2	24.718	24.718	39.024	24.314	24.314	40.644		24.258	24.258	40.838
N	1.111	1.111	1.111		0.180343		N	1.109	1.109	1.109	1.106	1.106	1.106		N	1.093	1.093	1.093	1.09	1.09	1.09		1.108	1.108	1.108
N2H2	3.561	2.062	2.854		0.0678539		N2H2	3.559	2.06	2.853	3.563	2.079	2.929		N2H2	3.554	2.046	2.846	3.558	2.066	2.924		3.565	2.08	2.929
Na	24.042	24.042	24.042		0.103877		Na	24.067	24.067	24.067	23.57	23.57	23.57		Na	23.956	23.956	23.956	23.549	23.549	23.549		23.479	23.479	23.479
Na2	30.398	30.398	50.843		0.0590497		Na2	30.397	30.397	50.895	29.619	29.619	51.473		Na2	30.361	30.361	50.895	29.631	29.631	51.559		29.585	29.585	51.358
NaLi	27.429	27.429	45.092		0.157589		NaLi	27.442	27.442	44.973	26.836	26.836	46.087		NaLi	27.438	27.438	45.013	26.875	26.875	46.171		26.792	26.792	46.174
NH	1.335	1.335	1.696		0.25467		NH	1.331	1.331	1.694	1.349	1.349	1.725		NH	1.312	1.312	1.685	1.33	1.33	1.717		1.353	1.353	1.726
NH2	1.557	1.861	1.891		0.303931		NH2	1.55	1.862	1.886	1.59	1.896	1.952		NH2	1.528	1.858	1.869	1.566	1.892	1.934		1.598	1.895	1.958
NO	1.458	1.458	2.254		0.3089		NO	1.453	1.453	2.249	1.509	1.509	2.267		NO	1.432	1.432	2.239	1.486	1.486	2.256		1.515	1.515	2.273
NOCl	4.74	6.854	3.331		0.0351015		NOCl	4.742	6.851	3.331	4.826	6.893	3.391		NOCl	4.692	6.823	3.275	4.775	6.871	3.333		4.825	6.892	3.392
NP	3.568	3.568	5.385		0.0252759		NP	3.567	3.567	5.386	3.574	3.574	5.438		NP	3.547	3.547	5.383	3.558	3.558	5.437		3.572	3.572	5.436
O2	1.171	1.171	2.419		0.254147		O2	1.168	1.168	2.413	1.209	1.209	2.311		O2	1.146	1.146	2.401	1.183	1.183	2.3		1.215	1.215	2.316
O3	1.716	4.914	2.004		0.27277		O3	1.711	4.908	1.997	1.733	4.495	2.089		O3	1.68	4.893	1.972	1.701	4.483	2.063		1.739	4.499	2.097
OCl	2.495	2.495	4.123		0.0712445		OCl	2.493	2.493	4.121	2.538	2.538	4.287		OCl	2.446	2.446	4.089	2.487	2.487	4.254		2.543	2.543	4.29
OF	1.077	1.077	1.985		0.419131		OF	1.072	1.072	1.979	1.127	1.127	2.04		OF	1.043	1.043	1.962	1.093	1.093	2.022		1.136	1.136	2.047
OF2	1.384	2.992	1.96		0.31639		OF2	1.379	2.986	1.953	1.447	2.965	1.977		OF2	1.35	2.965	1.926	1.413	2.942	1.946		1.456	2.972	1.987
OH	1.075	1.075	1.243		0.543186		OH	1.068	1.068	1.241	1.121	1.121	1.277		OH	1.038	1.038	1.233	1.088	1.088	1.269		1.13	1.13	1.279
P	3.87	3.87	3.87		0.103252		P	3.874	3.874	3.874	3.847	3.847	3.847		P	3.847	3.847	3.847	3.823	3.823	3.823		3.841	3.841	3.841
PH	4.037	4.037	4.447		0.0424631		PH	4.039	4.039	4.448	4.034	4.034	4.458		PH	4.013	4.013	4.419	4.01	4.01	4.431		4.031	4.031	4.456
PH2	4.185	4.48	4.566		0.0180506		PH2	4.185	4.481	4.567	4.198	4.493	4.59		PH2	4.163	4.461	4.54	4.177	4.474	4.564		4.197	4.491	4.588
S2	4.648	4.648	8.956		0.122781		S2	4.655	4.655	8.956	4.704	4.704	8.724		S2	4.611	4.611	8.92	4.659	4.659	8.693		4.698	4.698	8.72
SCl	4.389	4.389	7.148		0.167087		SCl	4.398	4.398	7.148	4.469	4.469	7.295		SCl	4.34	4.34	7.094	4.411	4.411	7.241		4.46	4.46	7.295
SF	3.225	3.225	3.534		0.0551235		SF	3.226	3.226	3.537	3.287	3.287	3.638		SF	3.167	3.167	3.508	3.229	3.229	3.609		3.285	3.285	3.635
SH	3.498	3.498	3.492		0.163903		SH	3.505	3.505	3.491	3.543	3.543	3.512		SH	3.456	3.456	3.451	3.496	3.496	3.473		3.535	3.535	3.512
SO-trip	2.921	2.921	4.375		0.140003		SO-trip	2.916	2.916	4.375	2.975	2.975	4.361		SO-trip	2.873	2.873	4.359	2.926	2.926	4.342		2.984	2.984	4.363
CN	2.786	2.786	3.701		0		CN	2.786	2.786	3.701	2.594	2.594	4.207		CN	2.78	2.78	3.698	2.59	2.59	4.205		2.593	2.593	4.206
P2	6.052	6.052	10.306		0.0419775		P2	6.055	6.055	10.304	5.976	5.976	10.216		P2	6.018	6.018	10.296	5.949	5.949	10.212		5.966	5.966	10.215
PS	5.658	5.658	9.333		0.0867143		PS	5.664	5.664	9.332	5.723	5.723	9.374		PS	5.612	5.612	9.295	5.675	5.675	9.339		5.714	5.714	9.374
CH3	2.378	2.378	2.413		0.155215		CH3	2.374	2.374	2.41	2.4	2.4	2.463		CH3	2.355	2.355	2.39	2.381	2.381	2.443		2.404	2.404	2.466
NCO	2.236	2.236	4.633		0.148435		NCO	2.232	2.232	4.631	2.274	2.274	4.792		NCO	2.214	2.214	4.632	2.257	2.257	4.795		2.277	2.277	4.793
FCO	3.213	2.351	1.982		0.155114		FCO	3.212	2.349	1.977	3.355	2.435	2.043		FCO	3.206	2.334	1.955	3.35	2.422	2.022		3.355	2.436	2.047
SiH3	5.056	5.056	5.044		0.0379665		SiH3	5.055	5.055	5.041	5.094	5.094	5.101		SiH3	5.049	5.049	5.036	5.089	5.089	5.096		5.094	5.094	5.104
				RMSE	0.31
				MAX	2.38

[truncated: 5 more sheets: XYGJOS Extrapolate , wB97X-2 Extrapolate, DSD-PBE-Extrapolate, B2PLYP Extrapolation , B2GPPLYP Extrapolation]
